# Supplementary material
Source: publisher figshare collection journal article supplement (https://gsajournals.figshare.com/articles/dataset/_/13409696)
Supplement: Supplementary file 1 [file 1]

## Sheet: Description
Spreadsheet Name	Description
SigGWASresults	Markers with significant associations with factor scores (p < 2.57 x10^-7).
MarksForKernel	Markers that were used to construct the biologically-informed kernel. These are markers that are in LD with markers associated with any factor.
MarksForLipidKernel	Markers that were used to construct the biologically-informed kernel for lipid enriched factors. These are markers that are in LD with markers associated with lipid-enriched factors.
MarkerMap	Physical positions of markers used for genome-wide association mapping.

## Sheet: SigGWASresults
Physical positions are based off the OT3098 Pepsi Genome Assembly V1 (https://wheat.pw.usda.gov/GG3/graingenes_downloads/oat-ot3098-pepsico). Linkage groups are named according to Carlson et al (2019; https://doi.org/10.1534/g3.119.400228)
Marker	Linkage Group	Chromosome	Base Pairs	-log10(P)	Factor
avgbs_100036.1.49	Unk	6C	529072464	13.5659	Fact 100
avgbs_100987.1.9	Mrg04	6D	283888028	8.28485	Fact 68
avgbs_101350.1.38	Unk	6C	560816086	7.07636	Fact 40
avgbs_101383.1.46	Mrg08	2D	339141914	12.4415	Fact 39
avgbs_102310.1.45	Unk	7D	209273298	7.10635	Fact 81
avgbs_102458.1.58	Unk	7D	329407842	7.72787	Fact 81
avgbs_10408.1.61	Mrg17	5C	573899811	7.87584	Fact 100
avgbs_10408.1.61	Mrg17	5C	573899811	13.9881	Fact 40
avgbs_104675.1.24	Unk	6D	274327914	7.80529	Fact 68
avgbs_104838.1.41	Unk	7D	142918578	11.5203	Fact 81
avgbs_105944.1.39	Unk	1D	368116492	6.87157	Fact 54
avgbs_10627.1.18	Mrg04	6D	281571294	16.8888	Fact 68
avgbs_106282.1.31	Unk	7D	252689896	10.0855	Fact 81
avgbs_107431.1.8	Unk	6D	274797043	8.22476	Fact 68
avgbs_107555.1.56	Unk	7D	210362645	10.7814	Fact 81
avgbs_108809.1.55	Mrg21	Unk	54	7.31252	Fact 51
avgbs_108935.1.57	Unk	6C	540119000	27.7833	Fact 40
avgbs_10904.1.12	Mrg17	6C	543243738	15.0732	Fact 40
avgbs_109107.1.18	Unk	6C	527755242	10.7089	Fact 100
avgbs_109610.1.24	Unk	6C	548452709	10.2733	Fact 40
avgbs_109660.1.54	Unk	2D	337646347	8.60292	Fact 39
avgbs_109913.1.36	Unk	5A	37175213	10.6253	Fact 13
avgbs_110948.1.60	Unk	7A	394887930	6.65074	Fact 94
avgbs_111018.1.28	Unk	7D	297028309	7.06605	Fact 81
avgbs_111743.1.21	Mrg17	6C	549089790	6.92652	Fact 40
avgbs_112897.1.17	Unk	7D	74660945	7.73591	Fact 81
avgbs_11502.1.49	Mrg08	2D	338506893	13.2665	Fact 39
avgbs_115604.1.44	Mrg21	4A	461062829	6.92998	Fact 51
avgbs_11587.1.64	Unk	1D	366348406	7.49779	Fact 91
avgbs_116058.1.34	Unk	2C	549528909	7.07075	Fact 65
avgbs_116334.1.46	Unk	7A	427829727	9.45783	Fact 17
avgbs_11742.1.55	Unk	7D	54940188	7.58068	Fact 81
avgbs_117551.1.58	Mrg13	2C	555630705	21.1494	Fact 65
avgbs_118549.1.28	Unk	6D	259354640	7.94161	Fact 94
avgbs_119840.1.37	Mrg13	2C	551151487	8.43257	Fact 65
avgbs_120496.1.38	Mrg04	6D	284467812	10.5664	Fact 68
avgbs_122437.1.44	Mrg01	1A	351821092	10.473	Fact 34
avgbs_123693.1.12	Unk	7D	253924380	7.32136	Fact 81
avgbs_124987.1.54	Unk	6D	280388677	12.7211	Fact 79
avgbs_125050.1.36	Mrg13	2C	555590778	20.8044	Fact 65
avgbs_125554.1.37	Unk	6D	279179895	14.6611	Fact 79
avgbs_12681.1.23	Mrg24	Unk	147	10.2069	Fact 13
avgbs_13629.1.42	Unk	5D	493922479	17.4844	Fact 51
avgbs_13936.1.26	Unk	2C	10478096	7.78632	Fact 83
avgbs_1410.1.39	Mrg17	6C	533365851	6.92246	Fact 83
avgbs_1443.1.28	Mrg01	1D	375482379	7.41332	Fact 54
avgbs_151.1.56	Mrg04	Unk	165	8.07604	Fact 68
avgbs_161.1.18	Mrg17	6C	560680569	7.15906	Fact 40
avgbs_16451.1.64	Unk	6C	551649662	6.73419	Fact 40
avgbs_16946.1.36	Mrg05	6A	311075208	9.00406	Fact 86
avgbs_17181.1.9	Unk	7D	320825793	10.6436	Fact 81
avgbs_18192.1.49	Unk	7D	303817512	13.3185	Fact 81
avgbs_18313.1.41	Unk	6D	276145971	11.7044	Fact 79
avgbs_18592.1.6	Mrg13	2C	555000613	15.891	Fact 65
avgbs_18811.1.59	Mrg17	6C	543103967	15.5969	Fact 40
avgbs_19022.1.45	Mrg04	6D	264011378	6.93396	Fact 68
avgbs_19097.1.39	Mrg02	7D	318459276	7.01263	Fact 81
avgbs_202725.1.51	Mrg17	6C	543830042	7.23556	Fact 40
avgbs_203075.1.15	Mrg01	Unk	245	7.01852	Fact 82
avgbs_203075.1.15	Mrg01	Unk	245	10.9546	Fact 91
avgbs_203303.1.36	Mrg01	1D	373076430	6.594	Fact 54
avgbs_204450.1.23	Mrg13	Unk	256	26.2025	Fact 65
avgbs_204749.1.6	Unk	7D	313795786	12.582	Fact 81
avgbs_206077.1.13	Unk	5A	428581630	8.03198	Fact 30
avgbs_207674.1.19	Mrg04	Unk	301	7.49464	Fact 68
avgbs_210628.1.39	Unk	6C	538827847	20.4866	Fact 100
avgbs_210628.1.39	Unk	6C	538827847	9.53986	Fact 40
avgbs_212116.1.41	Unk	6C	540049209	12.8253	Fact 40
avgbs_212116.1.41	Unk	6C	540049209	22.8513	Fact 100
avgbs_213320.1.34	Mrg13	Unk	313	30.3563	Fact 65
avgbs_213342.1.24	Mrg17	Unk	315	11.032	Fact 40
avgbs_213342.1.24	Mrg17	Unk	315	22.6262	Fact 100
avgbs_213346.1.27	Unk	7D	121675260	8.10715	Fact 81
avgbs_213543.1.30	Unk	Unk	7545	23.5882	Fact 86
avgbs_213632.1.42	Mrg17	Unk	319	17.3821	Fact 40
avgbs_213632.1.42	Mrg17	Unk	319	6.703	Fact 100
avgbs_213768.1.55	Mrg08	2D	337832675	8.38714	Fact 39
avgbs_214038.1.28	Mrg17	6C	543141561	16.5384	Fact 40
avgbs_214967.1.60	Mrg02	7D	65788863	7.23198	Fact 81
avgbs_215596.1.19	Mrg17	Unk	355	7.01815	Fact 40
avgbs_215612.1.11	Mrg17	6C	553257604	7.6143	Fact 40
avgbs_215859.1.22	Unk	7D	340428681	8.0833	Fact 81
avgbs_215968.1.26	Mrg17	Unk	362	10.997	Fact 40
avgbs_215968.1.26	Mrg17	Unk	362	20.816	Fact 100
avgbs_216102.1.62	Mrg04	6D	283318071	11.0775	Fact 68
avgbs_216822.1.31	Mrg12	Unk	373	8.88254	Fact 94
avgbs_21919.1.6	Mrg17	6C	557002713	8.06996	Fact 40
avgbs_221928.1.27	Mrg13	2C	555480137	21.69	Fact 65
avgbs_222876.1.56	Mrg06	5D	493843387	20.7914	Fact 51
avgbs_223431.1.27	Mrg04	6D	261734712	8.17937	Fact 68
avgbs_224639.1.45	Mrg18	1A	352202288	10.0639	Fact 34
avgbs_228829.1.63	Unk	6D	277016490	14.87	Fact 68
avgbs_228854.1.49	Mrg05	Unk	489	7.52817	Fact 98
avgbs_231817.1.29	Unk	5A	41172103	9.71462	Fact 13
avgbs_233912.1.44	Mrg17	Unk	509	22.2895	Fact 100
avgbs_233912.1.44	Mrg17	Unk	509	15.1074	Fact 40
avgbs_243454.1.50	Unk	6C	566838215	6.67829	Fact 40
avgbs_245659.1.26	Mrg01	1A	349139566	8.46023	Fact 34
avgbs_246732.1.49	Unk	6C	544860236	11.2057	Fact 40
avgbs_246961.1.61	Unk	7C	717955097	11.8292	Fact 98
avgbs_247246.1.46	Unk	6C	542565406	6.91327	Fact 40
avgbs_247246.1.46	Unk	6C	542565406	11.6676	Fact 100
avgbs_2500.1.49	Unk	7D	328443189	8.36221	Fact 81
avgbs_26906.1.10	Unk	2D	338876464	13.1467	Fact 39
avgbs_26907.1.10	Mrg08	Unk	585	10.0636	Fact 39
avgbs_27055.1.29	Unk	6D	262527926	6.78578	Fact 68
avgbs_28893.1.48	Unk	2C	555483280	23.3564	Fact 65
avgbs_29347.1.43	Unk	7D	48599488	6.92414	Fact 81
avgbs_29928.1.7	Mrg17	6C	537318294	12.1748	Fact 100
avgbs_30409.1.19	Unk	6D	280203800	13.9341	Fact 79
avgbs_30676.1.23	Unk	7D	133327178	8.83418	Fact 81
avgbs_3071.1.24	Unk	6A	313098428	23.977	Fact 86
avgbs_307880.1.62	Mrg13	2C	554694955	15.8037	Fact 65
avgbs_31072.1.38	Unk	5A	40747184	8.89317	Fact 13
avgbs_31236.1.54	Mrg13	2C	554571154	19.6345	Fact 65
avgbs_31262.1.45	Unk	7D	315495778	6.97485	Fact 81
avgbs_31461.1.23	Unk	5A	36947891	9.63782	Fact 13
avgbs_31907.1.34	Unk	6A	315700309	10.2943	Fact 79
avgbs_321059.1.8	Mrg04	6D	281639583	13.1585	Fact 79
avgbs_32188.1.24	Unk	Unk	7680	7.33179	Fact 68
avgbs_32390.1.37	Mrg04	6D	271655526	6.8866	Fact 68
avgbs_32745.1.20	Mrg12	7A	393962456	8.07985	Fact 94
avgbs_330960.1.63	Unk	7D	299145835	7.10762	Fact 81
avgbs_33410.1.56	Unk	6A	315068073	7.35613	Fact 79
avgbs_33697.1.39	Unk	5D	382699668	7.35973	Fact 81
avgbs_33994.1.7	Unk	6C	545590064	6.82523	Fact 40
avgbs_34251.1.62	Mrg17	6C	540833639	12.1514	Fact 40
avgbs_34338.1.36	Unk	Chr00	48438569	6.69645	Fact 98
avgbs_347778.1.37	Unk	7D	243425348	6.61854	Fact 81
avgbs_35108.1.22	Unk	Unk	7714	12.5915	Fact 40
avgbs_35109.1.22	Mrg17	Unk	660	14.1303	Fact 40
avgbs_353946.1.54	Unk	7D	170734294	10.3544	Fact 81
avgbs_360176.1.62	Unk	7D	318093037	6.86361	Fact 81
avgbs_37754.1.50	Unk	7D	209313711	7.00445	Fact 81
avgbs_385020.1.20	Unk	5A	37414460	9.01804	Fact 13
avgbs_38734.1.43	Mrg05	Unk	697	7.74679	Fact 79
avgbs_390182.1.7	Unk	7D	323585815	6.82979	Fact 81
avgbs_393360.1.34	Unk	7D	55741679	7.05497	Fact 81
avgbs_39605.1.8	Unk	7D	59081814	7.17425	Fact 81
avgbs_400546.1.39	Unk	7D	299507354	6.9411	Fact 81
avgbs_402689.1.61	Unk	7D	253382651	10.2477	Fact 81
avgbs_405303.1.57	Unk	7D	373033547	6.83606	Fact 81
avgbs_41718.1.32	Unk	6D	276810936	13.19	Fact 79
avgbs_419.1.53	Unk	6A	413425953	6.75141	Fact 4
avgbs_4381.1.11	Unk	7A	394615122	7.71035	Fact 94
avgbs_44099.1.18	Unk	7D	324127304	9.66799	Fact 81
avgbs_450607.1.8	Unk	6C	529053802	11.9291	Fact 100
avgbs_458102.1.27	Unk	6C	539850277	13.2782	Fact 40
avgbs_458102.1.27	Unk	6C	539850277	13.7084	Fact 100
avgbs_46068.1.55	Unk	7D	320250794	6.60134	Fact 81
avgbs_4743.1.52	Unk	1D	371283187	7.68833	Fact 54
avgbs_48102.1.36	Unk	7A	429052171	7.76686	Fact 17
avgbs_48279.1.48	Mrg04	6D	284198492	13.8679	Fact 79
avgbs_48666.1.46	Unk	6A	315179692	7.27502	Fact 79
avgbs_49522.1.31	Mrg17	6C	535780532	7.10974	Fact 40
avgbs_495993.1.50	Unk	7D	302788250	6.85481	Fact 81
avgbs_49751.1.61	Unk	7A	389734134	7.18188	Fact 94
avgbs_505.1.10	Mrg17	6C	579851557	6.7481	Fact 100
avgbs_521466.1.16	Unk	6C	539253620	9.18092	Fact 40
avgbs_52272.1.23	Unk	7D	55613502	7.29746	Fact 81
avgbs_5232.1.43	Unk	1D	368250147	7.17022	Fact 54
avgbs_533107.1.21	Unk	5A	43078116	9.50179	Fact 13
avgbs_54809.1.23	Unk	7D	119059665	11.2746	Fact 81
avgbs_55595.1.32	Unk	7D	364998142	7.99718	Fact 81
avgbs_57434.1.8	Unk	2C	554610086	23.0873	Fact 65
avgbs_589634.1.39	Unk	7D	318140839	6.69125	Fact 81
avgbs_59660.1.24	Mrg06	5D	493922735	13.6595	Fact 51
avgbs_60089.1.24	Unk	1A	350849633	10.4836	Fact 34
avgbs_60106.1.12	Unk	6C	575484497	7.30119	Fact 100
avgbs_60165.1.59	Unk	2C	555759359	11.1037	Fact 65
avgbs_60350.1.10	Mrg04	6D	278161983	14.1063	Fact 68
avgbs_604759.1.34	Unk	2C	555707319	21.7939	Fact 65
avgbs_61145.1.64	Unk	5A	42439802	7.93821	Fact 13
avgbs_61426.1.58	Mrg12	7A	389600460	7.8514	Fact 94
avgbs_623056.1.24	Unk	6C	540073872	13.3739	Fact 40
avgbs_623056.1.24	Unk	6C	540073872	22.7799	Fact 100
avgbs_627529.1.12	Unk	2C	555586585	21.8223	Fact 65
avgbs_63488.1.16	Mrg17	Unk	880	12.7368	Fact 40
avgbs_64189.1.57	Unk	7A	388209663	8.13094	Fact 94
avgbs_6424.1.7	Mrg04	6D	274250616	7.10777	Fact 68
avgbs_64476.1.52	Unk	2C	556000075	20.4001	Fact 65
avgbs_6500.1.39	Mrg06	5D	494525511	8.37714	Fact 51
avgbs_661488.1.37	Unk	7D	117308588	6.71155	Fact 81
avgbs_66627.1.36	Unk	1A	354302628	7.80207	Fact 34
avgbs_67218.1.17	Unk	7D	304482772	8.27617	Fact 81
avgbs_6760.1.6	Unk	7D	53707724	7.20693	Fact 81
avgbs_68818.1.41	Unk	7D	304303527	7.32504	Fact 81
avgbs_69197.1.17	Unk	6D	285427169	9.09506	Fact 68
avgbs_6K_116641.1.57	Mrg04	6D	286086494	6.78088	Fact 79
avgbs_6K_18199.1.6	Unk	1D	372922938	8.21571	Fact 91
avgbs_70122.1.63	Unk	7A	93414257	8.95552	Fact 81
avgbs_70711.1.11	Unk	6D	286204032	7.26122	Fact 68
avgbs_72269.1.35	Unk	5A	43060045	7.81301	Fact 13
avgbs_72609.1.29	Mrg04	6D	281270035	15.4296	Fact 68
avgbs_72838.1.40	Mrg17	6C	544203719	7.50747	Fact 40
avgbs_73172.1.32	Unk	6C	540041079	11.1395	Fact 40
avgbs_73172.1.32	Unk	6C	540041079	21.3331	Fact 100
avgbs_73188.1.37	Unk	2C	554914148	17.456	Fact 65
avgbs_7388.1.43	Mrg17	6C	540524554	13.8998	Fact 40
avgbs_7388.1.43	Mrg17	6C	540524554	11.4816	Fact 100
avgbs_75263.1.14	Unk	7D	313929501	8.54777	Fact 81
avgbs_75609.1.10	Unk	Unk	8140	9.03151	Fact 39
avgbs_76631.1.40	Mrg24	5A	40523136	10.014	Fact 13
avgbs_78055.1.22	Unk	7D	298303891	12.5715	Fact 81
avgbs_78465.1.30	Unk	Unk	8165	13.3775	Fact 81
avgbs_79054.1.37	Unk	7D	311258453	7.28548	Fact 81
avgbs_79407.1.32	Unk	7A	394891326	6.84821	Fact 94
avgbs_79911.1.55	Unk	7D	65185494	7.16628	Fact 81
avgbs_81533.1.39	Unk	6A	378183064	7.99128	Fact 81
avgbs_82765.1.34	Unk	6C	540527964	17.441	Fact 40
avgbs_82765.1.34	Unk	6C	540527964	9.79138	Fact 100
avgbs_84212.1.58	Unk	2C	555767783	20.563	Fact 65
avgbs_84738.1.64	Mrg18	1A	354322084	9.10076	Fact 34
avgbs_84941.1.32	Unk	7D	327743885	7.67318	Fact 81
avgbs_85600.1.38	Unk	2D	338277640	9.94511	Fact 39
avgbs_85822.1.18	Mrg13	Unk	1013	18.3724	Fact 65
avgbs_86754.1.56	Mrg18	1A	353273208	10.1548	Fact 34
avgbs_87837.1.10	Mrg04	6D	281720792	16.1644	Fact 68
avgbs_88271.1.31	Unk	7D	79253989	13.1744	Fact 81
avgbs_88481.1.34	Mrg17	6C	538212303	13.9668	Fact 40
avgbs_88481.1.34	Mrg17	6C	538212303	24.8779	Fact 100
avgbs_89225.1.56	Unk	6C	545944478	8.6425	Fact 40
avgbs_89444.1.41	Unk	6D	281416473	13.2143	Fact 79
avgbs_8987.1.29	Unk	7A	427829797	8.20151	Fact 17
avgbs_90368.1.15	Unk	7D	255670221	11.1143	Fact 81
avgbs_90630.1.63	Mrg06	5A	428527655	6.62245	Fact 30
avgbs_91164.1.62	Unk	6C	546069243	11.6039	Fact 40
avgbs_91192.1.7	Mrg02	7D	81653531	11.6616	Fact 81
avgbs_9145.1.19	Mrg17	6C	538898768	16.4251	Fact 40
avgbs_92322.1.30	Unk	7D	341791200	6.66455	Fact 81
avgbs_92503.1.44	Unk	1A	347481741	7.41388	Fact 34
avgbs_92819.1.33	Unk	6D	261621828	8.1496	Fact 68
avgbs_94099.1.49	Unk	6C	557714685	7.90757	Fact 40
avgbs_94282.1.39	Mrg01	1A	353111702	10.517	Fact 34
avgbs_94399.1.15	Unk	Unk	8271	15.2575	Fact 40
avgbs_94889.1.34	Unk	2D	337520940	6.74877	Fact 39
avgbs_95342.1.8	Mrg04	Unk	1079	16.6092	Fact 68
avgbs_96208.1.22	Mrg04	6D	290993940	6.78288	Fact 79
avgbs_970.1.7	Unk	6D	290995777	7.86216	Fact 79
avgbs_97744.1.15	Unk	6A	312834058	25.4352	Fact 86
avgbs_97955.1.64	Mrg17	6C	538060518	14.7696	Fact 40
avgbs_99127.1.30	Mrg24	5A	41321361	9.55969	Fact 13
avgbs_99677.1.15	Mrg17	6C	542916760	15.7026	Fact 40
avgbs_99988.1.8	Mrg04	6D	284407081	8.58423	Fact 68
avgbs_cluster_10071.1.63	Unk	Unk	8316	8.62985	Fact 81
avgbs_cluster_10149.1.13	Mrg17	6C	554038812	7.20129	Fact 40
avgbs_cluster_10223.1.24	Unk	7D	316302766	9.38074	Fact 81
avgbs_cluster_10308.1.12	Mrg12	7A	393151481	7.68756	Fact 94
avgbs_cluster_10308.1.29	Mrg12	7A	393151498	8.33871	Fact 94
avgbs_cluster_10370.1.38	Mrg12	Unk	1137	6.80678	Fact 60
avgbs_cluster_104.1.35	Unk	7D	291363524	6.69051	Fact 81
avgbs_cluster_10522.1.44	Unk	7D	360953967	10.7223	Fact 81
avgbs_cluster_1060.1.29	Unk	7D	284634647	7.0175	Fact 81
avgbs_cluster_10687.1.43	Mrg02	7D	61491698	7.57853	Fact 81
avgbs_cluster_10879.1.41	Mrg04	Unk	1202	12.0758	Fact 79
avgbs_cluster_10984.1.27	Unk	6C	579825425	6.68035	Fact 100
avgbs_cluster_11105.1.7	Unk	7D	65524730	6.83055	Fact 81
avgbs_cluster_11167.1.30	Unk	7C	713670239	11.6853	Fact 98
avgbs_cluster_11177.1.60	Unk	Unk	8466	12.0451	Fact 81
avgbs_cluster_11224.1.54	Mrg17	Unk	1239	6.82648	Fact 40
avgbs_cluster_11423.1.33	Unk	6C	558020657	7.34982	Fact 40
avgbs_cluster_11456.1.7	Unk	7D	43125418	7.65208	Fact 81
avgbs_cluster_1151.1.36	Unk	Unk	8504	13.0125	Fact 79
avgbs_cluster_11840.1.23	Mrg18	Unk	1311	8.87595	Fact 34
avgbs_cluster_11988.1.21	Unk	6C	539525625	7.10148	Fact 40
avgbs_cluster_11988.1.21	Unk	6C	539525625	17.2076	Fact 100
avgbs_cluster_1227.1.11	Unk	7D	134632135	9.66941	Fact 81
avgbs_cluster_12341.1.7	Unk	Chr00	45452026	11.3784	Fact 98
avgbs_cluster_12347.1.22	Unk	2C	555175328	15.7375	Fact 65
avgbs_cluster_12563.1.46	Unk	6A	427576226	6.98993	Fact 98
avgbs_cluster_12564.1.10	Mrg06	Unk	1412	6.60048	Fact 30
avgbs_cluster_1267.1.45	Unk	7D	335951576	7.44349	Fact 81
avgbs_cluster_12823.1.19	Unk	7D	271677519	11.1498	Fact 81
avgbs_cluster_12995.1.18	Mrg04	Unk	1452	8.3302	Fact 68
avgbs_cluster_12995.1.53	Mrg04	Unk	1453	7.62099	Fact 68
avgbs_cluster_13030.2.45	Unk	6C	540296558	20.6232	Fact 100
avgbs_cluster_13030.2.45	Unk	6C	540296558	12.5194	Fact 40
avgbs_cluster_13422.1.47	Mrg04	6D	285090984	9.30042	Fact 68
avgbs_cluster_13465.1.40	Unk	Unk	8772	8.04553	Fact 81
avgbs_cluster_13543.1.24	Unk	7D	74567412	6.76196	Fact 81
avgbs_cluster_13732.1.12	Mrg02	7D	309542674	7.27713	Fact 81
avgbs_cluster_13858.1.40	Mrg04	Unk	1544	15.6575	Fact 79
avgbs_cluster_13859.1.40	Unk	Unk	8811	13.0842	Fact 79
avgbs_cluster_13892.2.22	Mrg05	Unk	1552	6.83745	Fact 98
avgbs_cluster_14076.2.37	Unk	7D	208396658	7.48856	Fact 81
avgbs_cluster_14376.1.46	Mrg17	6C	537473814	10.2135	Fact 40
avgbs_cluster_14376.1.49	Mrg17	6C	537473817	7.25514	Fact 40
avgbs_cluster_14376.1.49	Mrg17	6C	537473817	14.9959	Fact 100
avgbs_cluster_14489.1.26	Mrg13	Unk	1600	16.503	Fact 65
avgbs_cluster_14495.1.52	Mrg18	Unk	1602	9.50011	Fact 34
avgbs_cluster_1498.1.50	Mrg04	6D	284726841	16.0874	Fact 68
avgbs_cluster_15622.1.10	Unk	Unk	9050	25.8329	Fact 86
avgbs_cluster_15622.1.23	Mrg05	Unk	1685	15.204	Fact 86
avgbs_cluster_15635.1.11	Mrg17	6C	550697833	7.6981	Fact 40
avgbs_cluster_15670.1.14	Unk	Unk	9062	7.32611	Fact 81
avgbs_cluster_15701.1.17	Mrg02	Unk	1699	13.4102	Fact 81
avgbs_cluster_15816.1.12	Mrg13	Unk	1711	20.7858	Fact 65
avgbs_cluster_16007.1.15	Unk	7D	67674408	8.34433	Fact 81
avgbs_cluster_16376.1.47	Mrg05	6A	313051254	12.3498	Fact 86
avgbs_cluster_16656.1.12	Mrg04	6D	261782891	7.82082	Fact 68
avgbs_cluster_16795.1.32	Mrg04	Unk	1793	11.8855	Fact 68
avgbs_cluster_17125.1.16	Unk	Unk	9228	12.2911	Fact 40
avgbs_cluster_17125.1.16	Unk	Unk	9228	16.5752	Fact 100
avgbs_cluster_17198.1.27	Unk	Unk	9243	8.89217	Fact 81
avgbs_cluster_17555.1.21	Unk	7D	304889930	8.16536	Fact 81
avgbs_cluster_1770.1.7	Mrg01	1D	363850053	7.59077	Fact 91
avgbs_cluster_17927.1.17	Mrg04	Unk	1929	10.2798	Fact 79
avgbs_cluster_17965.1.6	Unk	Unk	9337	7.84019	Fact 81
avgbs_cluster_18226.1.25	Unk	Unk	9374	9.86985	Fact 91
avgbs_cluster_18226.1.25	Unk	Unk	9374	6.68932	Fact 82
avgbs_cluster_1830.1.24	Mrg13	Unk	1958	10.5222	Fact 65
avgbs_cluster_18335.1.26	Mrg12	7A	391404285	7.84877	Fact 94
avgbs_cluster_18454.1.40	Unk	7D	126713790	11.4149	Fact 81
avgbs_cluster_18600.1.60	Unk	Chr00	44457142	11.348	Fact 98
avgbs_cluster_1865.1.34	Unk	1A	353086453	10.8152	Fact 34
avgbs_cluster_18766.1.59	Unk	7D	381011101	10.2207	Fact 81
avgbs_cluster_18888.1.12	Mrg17	Unk	2010	11.1233	Fact 40
avgbs_cluster_18888.1.12	Mrg17	Unk	2010	14.6454	Fact 100
avgbs_cluster_19079.1.26	Unk	7D	143263373	11.0892	Fact 81
avgbs_cluster_19136.2.63	Unk	7D	368493630	13.6718	Fact 81
avgbs_cluster_19604.1.21	Mrg04	6D	278966800	10.9896	Fact 68
avgbs_cluster_2010.1.53	Mrg01	Unk	2112	6.96796	Fact 91
avgbs_cluster_20138.1.63	Unk	2D	11466136	9.46839	Fact 72
avgbs_cluster_20147.1.10	Unk	6C	552589489	9.12917	Fact 40
avgbs_cluster_20164.1.28	Unk	Unk	9604	8.19393	Fact 40
avgbs_cluster_20556.1.6	Unk	7D	299314391	8.82121	Fact 81
avgbs_cluster_21030.1.11	Mrg24	5A	41303095	8.80491	Fact 13
avgbs_cluster_21232.1.37	Mrg04	6D	279264317	8.36011	Fact 68
avgbs_cluster_21489.1.14	Mrg17	Unk	2241	7.04125	Fact 40
avgbs_cluster_21550.1.54	Mrg12	7A	392531983	7.33812	Fact 94
avgbs_cluster_21659.1.20	Unk	Chr00	44075253	8.38382	Fact 98
avgbs_cluster_21843.1.22	Mrg04	6D	284196418	8.4845	Fact 68
avgbs_cluster_22005.1.18	Mrg13	Unk	2281	20.6283	Fact 65
avgbs_cluster_22132.1.31	Unk	7A	421126819	13.3975	Fact 94
avgbs_cluster_2220.1.42	Mrg13	2C	555999673	19.7585	Fact 65
avgbs_cluster_22260.1.58	Unk	6A	312101105	12.9961	Fact 86
avgbs_cluster_22439.1.10	Unk	6C	556020520	9.67956	Fact 40
avgbs_cluster_22443.1.35	Unk	Unk	9897	6.93537	Fact 68
avgbs_cluster_22594.1.42	Mrg08	2D	337850502	8.20969	Fact 39
avgbs_cluster_22695.1.59	Unk	7D	327714427	9.85228	Fact 81
avgbs_cluster_22962.1.54	Unk	Unk	9965	7.79024	Fact 94
avgbs_cluster_23211.1.20	Mrg04	Unk	2385	11.5059	Fact 79
avgbs_cluster_23248.1.24	Mrg13	Unk	2389	25.5172	Fact 65
avgbs_cluster_23390.1.62	Mrg01	1A	351788772	6.9591	Fact 34
avgbs_cluster_23451.1.39	Unk	7D	338982109	10.9551	Fact 81
avgbs_cluster_23751.1.25	Unk	2C	555907050	10.7708	Fact 65
avgbs_cluster_2376.1.10	Mrg08	Unk	2439	7.39957	Fact 39
avgbs_cluster_23984.1.53	Unk	7D	284660083	8.57299	Fact 81
avgbs_cluster_24178.1.24	Mrg04	6D	280227638	13.9729	Fact 79
avgbs_cluster_24625.1.58	Unk	6A	426957207	7.83309	Fact 98
avgbs_cluster_24684.1.10	Mrg08	Unk	2520	8.92738	Fact 39
avgbs_cluster_24869.1.33	Unk	7D	155116443	11.3708	Fact 81
avgbs_cluster_24871.1.9	Unk	Unk	10174	12.975	Fact 81
avgbs_cluster_24900.1.61	Mrg17	6C	541184849	10.1881	Fact 40
avgbs_cluster_24900.1.61	Mrg17	6C	541184849	7.30211	Fact 100
avgbs_cluster_24965.1.23	Unk	6D	280095066	27.4178	Fact 68
avgbs_cluster_24982.1.13	Mrg04	Unk	2552	13.2554	Fact 79
avgbs_cluster_25403.1.27	Unk	7D	313124111	6.70511	Fact 81
avgbs_cluster_25422.1.45	Unk	6C	539644108	10.5288	Fact 40
avgbs_cluster_25477.1.18	Unk	6D	278087814	15.5147	Fact 68
avgbs_cluster_25507.1.60	Mrg06	Unk	2607	7.02692	Fact 30
avgbs_cluster_2576.1.34	Mrg18	Unk	2620	10.672	Fact 34
avgbs_cluster_25787.1.10	Unk	Unk	10271	8.76434	Fact 79
avgbs_cluster_2616.1.6	Mrg13	2C	551279804	7.96605	Fact 65
avgbs_cluster_2629.1.37	Mrg17	6C	538209459	7.51126	Fact 40
avgbs_cluster_26450.1.21	Unk	Unk	10354	7.02546	Fact 81
avgbs_cluster_26510.2.52	Mrg17	6C	527812001	11.807	Fact 100
avgbs_cluster_26586.2.29	Mrg04	6D	259415198	8.11249	Fact 68
avgbs_cluster_26879.1.25	Unk	1A	349895509	7.43627	Fact 34
avgbs_cluster_27024.1.14	Mrg17	6C	538074199	10.4014	Fact 40
avgbs_cluster_27088.1.36	Mrg17	6C	551362759	7.31341	Fact 40
avgbs_cluster_27133.1.36	Mrg01	1D	375133423	6.98205	Fact 91
avgbs_cluster_27137.1.23	Mrg12	7A	485023136	7.38919	Fact 60
avgbs_cluster_27211.1.46	Unk	7D	318368372	8.13064	Fact 81
avgbs_cluster_27389.1.30	Unk	7D	281565418	6.60163	Fact 81
avgbs_cluster_27483.1.20	Mrg04	Unk	2768	10.0461	Fact 68
avgbs_cluster_27622.1.46	Unk	6D	279499066	17.1246	Fact 68
avgbs_cluster_27709.1.39	Mrg13	2C	555590584	24.6139	Fact 65
avgbs_cluster_27897.1.25	Mrg17	Unk	2799	8.22684	Fact 40
avgbs_cluster_28056.1.46	Unk	6A	314474533	8.26635	Fact 79
avgbs_cluster_28070.1.51	Mrg13	2C	556423112	10.2485	Fact 65
avgbs_cluster_28241.1.23	Unk	6A	427644365	7.20432	Fact 98
avgbs_cluster_28318.1.24	Mrg11	7C	712336771	7.37049	Fact 98
avgbs_cluster_28375.1.13	Mrg12	7A	429556779	7.30716	Fact 17
avgbs_cluster_28453.1.33	Mrg04	Unk	2842	8.21817	Fact 68
avgbs_cluster_28556.1.14	Mrg12	Unk	2857	7.10932	Fact 60
avgbs_cluster_28685.1.7	Mrg05	Unk	2879	14.5792	Fact 86
avgbs_cluster_28740.1.24	Unk	7D	141084082	12.0543	Fact 81
avgbs_cluster_28969.1.61	Unk	6A	313209340	10.1301	Fact 86
avgbs_cluster_28982.1.24	Unk	Unk	10656	6.7805	Fact 40
avgbs_cluster_2907.1.63	Mrg28	Unk	2911	6.78121	Fact 34
avgbs_cluster_29513.1.64	Unk	7D	289241085	6.81594	Fact 81
avgbs_cluster_29694.1.64	Unk	7D	65531541	6.88115	Fact 81
avgbs_cluster_29722.1.14	Mrg08	2D	338506835	11.9824	Fact 39
avgbs_cluster_29762.1.13	Unk	Unk	10734	16.0274	Fact 68
avgbs_cluster_29921.1.12	Mrg12	Unk	2976	14.7242	Fact 17
avgbs_cluster_30190.1.62	Unk	6C	549368099	7.16105	Fact 40
avgbs_cluster_30838.1.42	Mrg02	7D	44766288	7.43947	Fact 81
avgbs_cluster_31037.1.11	Mrg01	1D	363588529	7.27512	Fact 91
avgbs_cluster_31261.1.16	Mrg17	Unk	3109	9.38953	Fact 40
avgbs_cluster_31318.1.52	Unk	6C	566448459	7.36794	Fact 40
avgbs_cluster_31496.1.35	Mrg04	6D	283903979	7.68415	Fact 68
avgbs_cluster_32046.1.56	Mrg04	6D	285090487	13.3632	Fact 68
avgbs_cluster_32363.1.28	Unk	7D	312449491	13.3608	Fact 81
avgbs_cluster_32540.1.58	Unk	2C	554914058	16.0808	Fact 65
avgbs_cluster_32542.1.54	Unk	6C	539229629	8.78007	Fact 40
avgbs_cluster_32695.1.18	Mrg04	6D	274374690	8.96153	Fact 68
avgbs_cluster_32739.1.15	Mrg04	Unk	3231	7.03204	Fact 68
avgbs_cluster_32923.1.11	Unk	7D	65258858	7.14311	Fact 81
avgbs_cluster_3309.1.51	Unk	2C	555301381	22.3278	Fact 65
avgbs_cluster_3309.1.64	Unk	2C	555301394	16.9078	Fact 65
avgbs_cluster_33283.1.32	Mrg17	6C	546250358	7.54856	Fact 40
avgbs_cluster_33525.1.48	Mrg04	6D	278474396	14.2719	Fact 68
avgbs_cluster_33534.1.20	Unk	7D	294077030	10.1489	Fact 81
avgbs_cluster_34009.1.23	Unk	7D	143369899	12.1792	Fact 81
avgbs_cluster_3417.1.59	Unk	7D	311255609	9.50863	Fact 81
avgbs_cluster_34682.1.19	Unk	Unk	11243	11.2179	Fact 81
avgbs_cluster_34989.1.28	Mrg17	6C	540736868	26.2707	Fact 40
avgbs_cluster_35225.1.42	Unk	7D	317305160	11.2041	Fact 81
avgbs_cluster_35633.1.39	Unk	6C	557731066	8.33439	Fact 40
avgbs_cluster_35745.1.18	Unk	7D	324422802	7.48715	Fact 81
avgbs_cluster_35832.1.11	Unk	Unk	11323	6.97183	Fact 68
avgbs_cluster_35866.2.46	Mrg04	6D	282921090	6.79552	Fact 68
avgbs_cluster_35889.1.28	Mrg13	Unk	3523	14.8313	Fact 65
avgbs_cluster_36118.1.26	Unk	1A	350420336	8.38017	Fact 34
avgbs_cluster_36279.1.21	Unk	6D	271300036	7.72522	Fact 68
avgbs_cluster_36438.1.39	Mrg24	5A	428235830	7.3776	Fact 30
avgbs_cluster_36552.1.45	Mrg04	Unk	3583	13.5392	Fact 79
avgbs_cluster_36552.1.52	Mrg04	Unk	3584	8.12582	Fact 79
avgbs_cluster_36667.1.30	Unk	6A	317066926	6.81627	Fact 79
avgbs_cluster_36722.1.18	Mrg12	Unk	3599	7.31111	Fact 60
avgbs_cluster_36872.1.37	Unk	3D	383374938	7.76045	Fact 40
avgbs_cluster_36879.1.21	Unk	Unk	11392	11.1178	Fact 81
avgbs_cluster_36900.1.20	Mrg08	Unk	3625	7.34587	Fact 39
avgbs_cluster_36931.1.24	Unk	Unk	11399	7.11416	Fact 81
avgbs_cluster_37662.1.34	Mrg08	Unk	3714	10.4932	Fact 39
avgbs_cluster_37895.1.15	Unk	7D	255658640	8.55068	Fact 81
avgbs_cluster_37901.1.52	Unk	6C	538197635	21.7354	Fact 100
avgbs_cluster_37901.1.52	Unk	6C	538197635	10.8209	Fact 40
avgbs_cluster_37928.1.63	Unk	2D	339045432	12.3654	Fact 39
avgbs_cluster_38015.1.36	Mrg13	2C	556779807	7.63337	Fact 65
avgbs_cluster_38254.1.19	Unk	Unk	11541	10.3082	Fact 81
avgbs_cluster_38394.1.38	Mrg13	2C	555382641	26.076	Fact 65
avgbs_cluster_38417.1.19	Unk	2C	548716764	7.95437	Fact 65
avgbs_cluster_38595.1.16	Unk	2C	555176577	14.8561	Fact 65
avgbs_cluster_38629.1.32	Mrg17	6C	560545413	6.5938	Fact 40
avgbs_cluster_38642.1.21	Mrg13	2C	555511613	19.8575	Fact 65
avgbs_cluster_3875.1.39	Mrg12	Unk	3832	8.45957	Fact 94
avgbs_cluster_39040.1.26	Unk	Unk	11606	12.4399	Fact 79
avgbs_cluster_39110.1.20	Mrg08	2D	12404244	9.30812	Fact 72
avgbs_cluster_39447.1.32	Mrg02	7D	250427875	7.20286	Fact 81
avgbs_cluster_39663.1.14	Unk	Chr00	44835097	13.4179	Fact 98
avgbs_cluster_40797.1.21	Unk	7D	249972714	10.7347	Fact 81
avgbs_cluster_40967.1.59	Mrg01	1D	369593867	6.80177	Fact 82
avgbs_cluster_41149.1.62	Mrg04	6D	256035915	6.60366	Fact 68
avgbs_cluster_41480.1.55	Mrg01	1D	374251936	7.0372	Fact 91
avgbs_cluster_41555.2.24	Mrg13	Unk	4083	26.9104	Fact 65
avgbs_cluster_42099.1.64	Unk	7D	68599413	7.51413	Fact 81
avgbs_cluster_4210.1.38	Unk	7D	306028670	13.9192	Fact 81
avgbs_cluster_42147.1.28	Unk	Unk	11781	22.9441	Fact 86
avgbs_cluster_42148.1.21	Mrg17	Unk	4111	13.037	Fact 40
avgbs_cluster_42148.1.21	Mrg17	Unk	4111	14.7507	Fact 100
avgbs_cluster_42148.2.45	Mrg17	Unk	4112	9.44575	Fact 40
avgbs_cluster_42149.1.27	Mrg17	Unk	4113	20.6411	Fact 100
avgbs_cluster_42149.1.27	Mrg17	Unk	4113	11.3509	Fact 40
avgbs_cluster_42256.1.61	Unk	7D	59113844	7.70335	Fact 81
avgbs_cluster_42338.1.26	Mrg17	Unk	4136	16.4001	Fact 40
avgbs_cluster_42432.1.43	Mrg12	Unk	4140	8.52959	Fact 94
avgbs_cluster_4300.1.26	Mrg04	6D	279182537	7.01059	Fact 79
avgbs_cluster_4405.1.62	Unk	6C	556470647	6.85674	Fact 40
avgbs_cluster_4440.1.18	Mrg04	6D	282078400	12.7961	Fact 68
avgbs_cluster_45073.1.15	Mrg08	Unk	4273	12.5452	Fact 39
avgbs_cluster_453.1.20	Mrg17	6C	554038784	7.90698	Fact 40
avgbs_cluster_4561.1.21	Mrg18	Unk	4288	10.0198	Fact 34
avgbs_cluster_45942.1.32	Unk	7D	59564647	7.58031	Fact 81
avgbs_cluster_4631.1.11	Unk	Unk	11850	6.79952	Fact 98
avgbs_cluster_4664.1.25	Mrg13	Unk	4321	10.7696	Fact 65
avgbs_cluster_4695.1.7	Mrg13	2C	556621610	7.49161	Fact 65
avgbs_cluster_47019.1.36	Mrg12	7A	488922756	7.84352	Fact 60
avgbs_cluster_47137.1.37	Unk	Unk	11867	7.3533	Fact 98
avgbs_cluster_4797.2.45	Unk	Unk	11884	7.00267	Fact 81
avgbs_cluster_48092.1.22	Mrg04	6A	318687178	19.1279	Fact 68
avgbs_cluster_483.1.35	Unk	Unk	11888	9.75263	Fact 81
avgbs_cluster_48375.1.8	Mrg17	6C	553258776	7.10149	Fact 40
avgbs_cluster_4840.1.55	Unk	Unk	11892	6.616	Fact 40
avgbs_cluster_48730.1.11	Mrg04	Unk	4383	10.0989	Fact 79
avgbs_cluster_4994.1.30	Unk	Unk	11907	14.8546	Fact 65
avgbs_cluster_51068.1.30	Mrg12	7A	393685595	7.52717	Fact 94
avgbs_cluster_51186.1.51	Unk	6A	312393231	20.4427	Fact 86
avgbs_cluster_5163.1.54	Mrg13	2C	555586761	21.6957	Fact 65
avgbs_cluster_53192.1.55	Mrg04	6A	324712018	9.25562	Fact 68
avgbs_cluster_53932.1.22	Unk	Unk	11958	9.84744	Fact 79
avgbs_cluster_53989.1.9	Unk	Chr00	50183984	7.32578	Fact 98
avgbs_cluster_5615.1.56	Unk	Unk	11994	8.42245	Fact 81
avgbs_cluster_5823.1.20	Mrg08	2D	337187796	7.35934	Fact 39
avgbs_cluster_6015.1.27	Mrg05	6A	313264385	21.578	Fact 86
avgbs_cluster_6182.1.39	Unk	7D	288955090	10.4741	Fact 81
avgbs_cluster_61914.1.6	Unk	Unk	12075	6.93255	Fact 81
avgbs_cluster_6238.1.12	Mrg04	Unk	4607	6.83641	Fact 68
avgbs_cluster_63170.1.25	Mrg13	2C	556549636	8.17845	Fact 65
avgbs_cluster_640.1.32	Unk	Unk	12103	7.06417	Fact 39
avgbs_cluster_6418.1.14	Unk	6D	285332797	9.42767	Fact 79
avgbs_cluster_67968.1.41	Unk	Unk	12154	10.231	Fact 68
avgbs_cluster_7257.1.38	Mrg02	7D	58738966	6.63441	Fact 81
avgbs_cluster_730.1.27	Mrg04	Unk	4775	12.1804	Fact 79
avgbs_cluster_730.1.27	Mrg04	Unk	4775	7.58711	Fact 68
avgbs_cluster_7425.1.31	Mrg17	Unk	4788	6.79473	Fact 40
avgbs_cluster_7612.1.63	Unk	Unk	12264	9.00463	Fact 81
avgbs_cluster_7678.1.14	Mrg17	6C	584530079	7.23189	Fact 100
avgbs_cluster_8125.1.10	Unk	Unk	12341	20.9172	Fact 100
avgbs_cluster_8125.1.10	Unk	Unk	12341	13.1633	Fact 40
avgbs_cluster_8281.1.25	Unk	7D	238963582	10.3438	Fact 81
avgbs_cluster_8331.1.42	Unk	Unk	12365	9.12577	Fact 40
avgbs_cluster_8331.1.42	Unk	Unk	12365	13.1135	Fact 100
avgbs_cluster_8369.1.22	Unk	7D	130634113	9.41128	Fact 81
avgbs_cluster_8392.1.7	Unk	7D	248524387	12.5368	Fact 81
avgbs_cluster_8499.1.18	Mrg12	Unk	4870	9.32161	Fact 94
avgbs_cluster_8515.1.35	Unk	7D	307896890	7.81125	Fact 81
avgbs_cluster_8526.1.44	Mrg17	6C	545872312	7.61306	Fact 40
avgbs_cluster_8529.1.57	Unk	7D	315832075	10.0432	Fact 81
avgbs_cluster_8889.1.8	Unk	6C	540287588	20.4261	Fact 100
avgbs_cluster_8889.1.8	Unk	6C	540287588	10.888	Fact 40
avgbs_cluster_9010.1.26	Mrg01	Unk	4914	6.82593	Fact 82
avgbs_cluster_9053.1.10	Mrg05	Unk	4920	12.5134	Fact 86
avgbs_cluster_9053.1.46	Mrg05	Unk	4921	6.68118	Fact 25
avgbs_cluster_9270.1.56	Mrg04	6D	278133807	14.3674	Fact 68
avgbs_cluster_9608.1.17	Unk	6C	540102438	14.4002	Fact 40
avgbs_cluster_9608.1.17	Unk	6C	540102438	23.8996	Fact 100
avgbs_cluster_9755.1.31	Mrg13	2C	555144196	25.7187	Fact 65
avgbs_cluster_9802.1.56	Unk	6D	279245308	7.06697	Fact 68
avgbs2_101184.1.14	Unk	Unk	12599	6.65006	Fact 40
avgbs2_101283.1.35	Unk	Unk	12602	7.69059	Fact 98
avgbs2_102685.1.22	Mrg04	Unk	5026	8.25169	Fact 68
avgbs2_105306.1.49	Unk	Unk	12710	9.95805	Fact 79
avgbs2_106122.1.27	Unk	Chr00	48229375	11.7309	Fact 98
avgbs2_106658.2.12	Mrg01	Unk	5079	8.35747	Fact 91
avgbs2_107870.1.14	Unk	Unk	12766	11.1324	Fact 86
avgbs2_107924.1.21	Mrg12	7A	393076437	7.10749	Fact 94
avgbs2_108178.1.32	Mrg04	Unk	5106	8.42744	Fact 68
avgbs2_110070.1.22	Mrg13	2C	555268805	15.1081	Fact 65
avgbs2_111634.1.15	Mrg17	6C	553529214	7.80529	Fact 40
avgbs2_113246.1.22	Mrg04	Unk	5172	12.4301	Fact 79
avgbs2_114274.2.42	Mrg01	1A	352539598	10.8196	Fact 34
avgbs2_115017.2.59	Unk	7D	305278397	7.56467	Fact 81
avgbs2_12155.1.14	Unk	Chr00	51700024	11.6141	Fact 98
avgbs2_122574.1.38	Unk	Unk	13019	11.8753	Fact 79
avgbs2_122574.2.39	Unk	Unk	13020	9.87951	Fact 86
avgbs2_124232.1.21	Unk	Unk	13070	8.21543	Fact 81
avgbs2_12713.1.47	Mrg12	Unk	5382	7.45582	Fact 94
avgbs2_127641.1.24	Unk	Unk	13131	7.40174	Fact 79
avgbs2_127642.1.24	Mrg04	Unk	5386	10.1892	Fact 79
avgbs2_133328.1.21	Mrg04	Unk	5451	7.45991	Fact 68
avgbs2_13501.1.27	Mrg12	Unk	5472	7.7776	Fact 94
avgbs2_135750.1.27	Mrg01	Unk	5482	10.39	Fact 34
avgbs2_136758.3.49	Unk	5A	37168464	9.26727	Fact 13
avgbs2_137277.1.16	Unk	Unk	13262	14.3312	Fact 68
avgbs2_137331.1.19	Unk	Unk	13265	7.46065	Fact 94
avgbs2_138078.1.61	Unk	6A	313209340	9.99094	Fact 86
avgbs2_139077.1.53	Unk	Unk	13295	13.8892	Fact 40
avgbs2_139591.1.27	Mrg12	Unk	5530	8.95345	Fact 94
avgbs2_14356.1.23	Unk	Unk	13391	8.05494	Fact 17
avgbs2_148956.1.12	Unk	Unk	13481	8.0495	Fact 68
avgbs2_151360.1.54	Unk	4D	390840963	15.7758	Fact 40
avgbs2_151360.1.54	Unk	4D	390840963	22.4922	Fact 100
avgbs2_152103.1.24	Unk	Unk	13538	6.80806	Fact 40
avgbs2_152877.1.23	Unk	Unk	13548	10.4341	Fact 79
avgbs2_152978.1.55	Mrg17	6C	584064002	9.46147	Fact 100
avgbs2_154463.1.17	Mrg13	Unk	5688	18.5318	Fact 65
avgbs2_155065.1.58	Mrg28	1A	352140866	9.78884	Fact 34
avgbs2_155696.1.10	Unk	Unk	13582	7.90374	Fact 94
avgbs2_155714.1.56	Mrg04	6D	285090487	11.8977	Fact 68
avgbs2_15823.1.44	Mrg02	7D	73138154	7.9714	Fact 81
avgbs2_162362.1.12	Mrg04	6D	279622090	8.18828	Fact 68
avgbs2_162362.1.12	Mrg04	6D	279622090	13.7269	Fact 79
avgbs2_163021.1.10	Mrg04	Unk	5796	6.95614	Fact 68
avgbs2_166355.1.29	Unk	Unk	13754	10.4513	Fact 79
avgbs2_166355.1.29	Unk	Unk	13754	6.70692	Fact 68
avgbs2_166355.1.58	Unk	Unk	13755	7.24724	Fact 79
avgbs2_166910.1.13	Mrg17	Unk	5852	8.43855	Fact 40
avgbs2_169205.1.16	Mrg04	Unk	5876	17.7104	Fact 68
avgbs2_170024.1.30	Unk	7D	335474226	10.527	Fact 81
avgbs2_170651.1.54	Unk	7D	297101070	10.5905	Fact 81
avgbs2_171220.1.15	Mrg17	Unk	5910	7.82308	Fact 40
avgbs2_172801.1.13	Mrg04	Unk	5925	9.65444	Fact 68
avgbs2_172807.2.28	Unk	Chr00	47701489	12.0049	Fact 98
avgbs2_173777.1.26	Mrg04	Unk	5936	12.5457	Fact 79
avgbs2_173777.1.38	Mrg04	Unk	5937	16.8434	Fact 68
avgbs2_173936.1.27	Unk	Unk	13867	6.74395	Fact 98
avgbs2_175849.1.10	Mrg04	Unk	5970	10.8792	Fact 68
avgbs2_175904.2.46	Mrg04	6D	282921090	6.76752	Fact 68
avgbs2_175953.1.15	Mrg17	6C	553205301	7.11028	Fact 40
avgbs2_177186.1.24	Unk	Unk	13908	14.2329	Fact 79
avgbs2_179418.1.16	Mrg12	Unk	6008	7.84103	Fact 94
avgbs2_187123.1.30	Mrg05	6A	428699513	6.89617	Fact 98
avgbs2_187123.1.41	Mrg05	6A	428699502	8.05611	Fact 98
avgbs2_188891.1.38	Mrg12	7A	394607223	7.92982	Fact 94
avgbs2_19127.1.16	Unk	6A	428592853	8.65383	Fact 98
avgbs2_191851.1.24	Mrg05	Unk	6172	8.26033	Fact 98
avgbs2_196705.1.32	Unk	Chr00	45603609	9.52835	Fact 98
avgbs2_197431.1.27	Mrg12	Unk	6238	6.93486	Fact 94
avgbs2_200150.1.24	Unk	Unk	14204	15.2345	Fact 51
avgbs2_22653.1.14	Unk	6A	296495496	9.60835	Fact 68
avgbs2_22661.2.60	Unk	6D	279622491	13.1466	Fact 79
avgbs2_23230.1.22	Unk	Unk	14259	9.94173	Fact 91
avgbs2_24319.1.22	Unk	Unk	14266	7.98549	Fact 98
avgbs2_26134.1.6	Unk	Chr00	44835112	13.0634	Fact 98
avgbs2_26901.1.42	Unk	Unk	14287	21.8554	Fact 51
avgbs2_2708.1.24	Mrg12	7A	393151844	7.94579	Fact 94
avgbs2_27927.1.55	Mrg17	6C	554168794	7.00948	Fact 40
avgbs2_31277.1.10	Unk	Unk	14349	7.36038	Fact 81
avgbs2_37995.1.38	Mrg08	Unk	6506	6.98931	Fact 39
avgbs2_41696.1.23	Unk	Unk	14538	10.6845	Fact 81
avgbs2_44747.1.11	Mrg17	Unk	6618	21.9874	Fact 100
avgbs2_44747.1.11	Mrg17	Unk	6618	10.5561	Fact 40
avgbs2_45599.1.18	Mrg12	Unk	6635	9.23338	Fact 94
avgbs2_47220.1.34	Unk	Unk	14723	11.9685	Fact 79
avgbs2_51171.1.18	Mrg08	2D	11634521	9.49226	Fact 72
avgbs2_51647.1.37	Mrg17	Unk	6727	9.57139	Fact 40
avgbs2_51647.1.37	Mrg17	Unk	6727	13.0308	Fact 100
avgbs2_51940.1.24	Unk	6A	311584049	18.0641	Fact 86
avgbs2_52206.1.23	Unk	6A	313052630	23.5498	Fact 86
avgbs2_52459.1.11	Unk	Unk	14863	16.7097	Fact 86
avgbs2_52459.1.31	Unk	Unk	14864	14.0905	Fact 86
avgbs2_52644.1.56	Unk	Unk	14875	6.97515	Fact 81
avgbs2_54698.1.26	Mrg04	6D	285196565	11.5606	Fact 68
avgbs2_57754.1.60	Unk	7D	173336798	10.2278	Fact 81
avgbs2_57965.1.54	Mrg17	Unk	6804	6.73972	Fact 40
avgbs2_59299.1.13	Unk	Unk	15027	13.219	Fact 100
avgbs2_59299.1.13	Unk	Unk	15027	12.1258	Fact 40
avgbs2_60644.1.41	Unk	6D	265890290	7.73404	Fact 68
avgbs2_61247.1.45	Mrg17	Unk	6844	10.5815	Fact 100
avgbs2_61247.1.45	Mrg17	Unk	6844	14.3272	Fact 40
avgbs2_61352.1.58	Unk	Unk	15065	8.97598	Fact 81
avgbs2_62499.1.11	Unk	6D	280387891	11.3979	Fact 68
avgbs2_62500.1.11	Mrg04	Unk	6865	14.5254	Fact 68
avgbs2_62769.1.27	Mrg11	Unk	6869	10.1143	Fact 98
avgbs2_63189.1.46	Unk	Unk	15099	11.2618	Fact 98
avgbs2_66247.1.16	Unk	5D	493775430	8.00629	Fact 51
avgbs2_66248.1.16	Mrg06	Unk	6926	7.01111	Fact 51
avgbs2_66439.1.41	Unk	Unk	15176	6.79519	Fact 40
avgbs2_70277.1.61	Unk	6C	542023432	11.6964	Fact 40
avgbs2_70277.1.61	Unk	6C	542023432	10.5208	Fact 100
avgbs2_70640.1.34	Unk	Unk	15288	6.60503	Fact 81
avgbs2_7186.1.23	Mrg05	Unk	6990	7.16922	Fact 4
avgbs2_72875.1.22	Unk	Unk	15347	6.75214	Fact 91
avgbs2_75619.1.60	Unk	7A	389655555	7.28504	Fact 94
avgbs2_80414.1.21	Mrg02	7D	284837160	7.64455	Fact 81
avgbs2_82105.1.19	Unk	Unk	15524	10.2852	Fact 81
avgbs2_83065.1.26	Mrg04	Unk	7130	8.7947	Fact 68
avgbs2_8354.1.9	Unk	7D	280766500	6.86404	Fact 81
avgbs2_83622.2.15	Unk	1D	365397694	10.2044	Fact 91
avgbs2_83622.2.15	Unk	1D	365397694	7.25341	Fact 82
avgbs2_84054.2.57	Unk	7D	144507788	11.2212	Fact 81
avgbs2_84381.1.63	Unk	Unk	15602	6.85705	Fact 40
avgbs2_84964.1.15	Mrg17	Unk	7155	8.31827	Fact 40
avgbs2_87273.1.20	Mrg02	7D	81692114	12.0268	Fact 81
avgbs2_87574.1.24	Unk	7D	288871914	9.20528	Fact 81
avgbs2_89325.1.29	Unk	Unk	15768	12.8999	Fact 91
avgbs2_89325.1.29	Unk	Unk	15768	7.88042	Fact 82
avgbs2_92005.1.47	Unk	Unk	15853	7.53615	Fact 81
avgbs2_92037.1.28	Unk	6D	278412044	14.1501	Fact 68
avgbs2_92407.1.15	Unk	7D	177983666	10.5829	Fact 81
avgbs2_93860.1.15	Mrg04	6D	281639590	18.5578	Fact 68
avgbs2_94881.1.27	Mrg18	Unk	7273	9.35088	Fact 34
avgbs2_96057.1.10	Unk	7A	387199656	6.97149	Fact 94
avgbs2_98803.1.11	Unk	Unk	16003	13.5179	Fact 79

## Sheet: MarksForKernel
Markers used to construct the biologically-informed kernel. These are markers that are in LD with markers associated with any factor.
Marker	Chromosome	Base Pairs
avgbs_100036.1.49	6C	529072464
avgbs_100058.1.15	6D	258084172
avgbs_100068.1.56	1C	130136137
avgbs_100186.1.8	7D	217981282
avgbs_100385.1.23	Unk	NA
avgbs_100388.1.9	5A	128826023
avgbs_100406.1.29	1C	211510554
avgbs_100410.1.56	7D	272636058
avgbs_100451.1.32	1D	384854462
avgbs_100474.1.34	6D	265908887
avgbs_100486.1.9	5A	269617596
avgbs_100503.1.22	Unk	NA
avgbs_100504.1.38	Unk	NA
avgbs_100573.1.40	5D	495431976
avgbs_100622.1.9	6D	256183085
avgbs_100666.1.18	1A	326609845
avgbs_100701.1.46	5A	273198132
avgbs_100753.1.12	2D	82936314
avgbs_100759.1.58	5C	534602652
avgbs_100824.1.31	7D	38318263
avgbs_100862.1.31	Unk	NA
avgbs_100884.1.15	1C	99522301
avgbs_10090.1.7	1C	240542677
avgbs_10091.1.55	6C	570356655
avgbs_100971.1.27	7D	197770864
avgbs_100974.1.45	5C	500100088
avgbs_100987.1.9	6D	283888028
avgbs_101.1.14	6A	321753728
avgbs_101025.1.52	1C	221973314
avgbs_101057.1.56	1A	343995391
avgbs_101101.1.9	7D	35044737
avgbs_101112.1.61	5A	151657368
avgbs_101114.1.41	Unk	NA
avgbs_101134.1.33	7D	502737047
avgbs_101201.1.31	6D	274424592
avgbs_101220.1.18	1C	372522069
avgbs_101311.1.61	1A	323789269
avgbs_101350.1.38	6C	560816086
avgbs_101357.1.28	1A	345979023
avgbs_101371.1.52	7D	217980667
avgbs_101383.1.46	2D	339141914
avgbs_101433.1.38	4D	361053011
avgbs_101458.1.22	2C	514923117
avgbs_101506.1.12	5A	299294809
avgbs_101586.1.12	7D	17172744
avgbs_101590.1.42	7D	206188143
avgbs_101620.1.48	7D	64554293
avgbs_101736.1.12	7D	432098193
avgbs_101741.1.28	1D	360347194
avgbs_10183.1.54	7D	30868554
avgbs_101854.1.49	5A	307510911
avgbs_101934.1.62	7D	264039214
avgbs_102073.1.24	6D	264318439
avgbs_1021.1.16	1C	189484208
avgbs_102100.1.17	Unk	NA
avgbs_102270.1.34	7D	54077259
avgbs_102310.1.45	7D	209273298
avgbs_10232.1.44	7D	76473688
avgbs_102358.1.39	7D	216858205
avgbs_102445.1.19	Unk	NA
avgbs_102458.1.58	7D	329407842
avgbs_102460.1.21	1A	216868908
avgbs_102509.1.28	5A	304087903
avgbs_102519.1.42	5A	124869106
avgbs_102557.1.64	7D	173777896
avgbs_102612.1.40	1C	400228278
avgbs_10262.1.20	1A	321723548
avgbs_102628.1.29	1C	307933858
avgbs_102667.1.21	7D	362920160
avgbs_102760.1.25	7D	87861797
avgbs_102811.1.28	7D	397804642
avgbs_102864.1.55	5A	187407845
avgbs_102912.1.31	7D	83189494
avgbs_102913.1.53	6D	229265008
avgbs_102929.1.40	7D	100579225
avgbs_102954.1.51	5A	208396972
avgbs_103058.1.47	7D	434138172
avgbs_103111.1.55	6D	242139557
avgbs_103207.1.23	7D	160204057
avgbs_103265.1.24	1D	341460821
avgbs_103283.1.43	1C	104951483
avgbs_103357.1.37	1C	322270585
avgbs_103366.1.11	1D	444954396
avgbs_103380.1.42	7D	198866897
avgbs_103414.1.35	1C	81141649
avgbs_103420.1.27	6C	559849770
avgbs_103426.1.48	7D	162491265
avgbs_103428.1.50	5A	31859553
avgbs_103431.1.21	1C	353593622
avgbs_103467.1.44	5A	293213004
avgbs_103643.1.27	7D	192871589
avgbs_103678.1.19	Unk	NA
avgbs_103688.1.20	1C	342428214
avgbs_10369.1.7	6D	259170267
avgbs_103696.1.29	6C	594131240
avgbs_103699.1.60	7A	469831683
avgbs_10388.1.35	1A	455804214
avgbs_103888.1.17	6A	333072120
avgbs_103934.1.51	1C	116451528
avgbs_103994.1.61	1C	16169761
avgbs_10400.1.43	1C	313998370
avgbs_10408.1.61	5C	573899811
avgbs_104082.1.57	5A	36770546
avgbs_104107.1.14	2D	77940079
avgbs_104136.1.41	7D	89036849
avgbs_104150.1.36	1C	128229187
avgbs_104393.1.54	Unk	NA
avgbs_104396.1.24	Unk	NA
avgbs_104402.1.16	5A	300222720
avgbs_104440.1.16	7D	249173997
avgbs_1045.1.39	7D	432551409
avgbs_104500.1.12	7D	356437729
avgbs_104579.1.10	7A	441975472
avgbs_104593.1.14	1C	200519934
avgbs_104655.1.64	1C	132904165
avgbs_104675.1.24	6D	274327914
avgbs_104737.1.60	1C	77287316
avgbs_104776.1.25	5A	340089873
avgbs_104818.1.16	1A	343961287
avgbs_104825.1.25	5A	133529578
avgbs_10485.1.55	1A	326426872
avgbs_104850.1.29	7D	126848612
avgbs_104855.1.12	5A	167698719
avgbs_104867.1.41	5A	158600840
avgbs_104870.1.41	7D	388777423
avgbs_104922.1.17	5A	271154552
avgbs_104978.1.53	5A	152543878
avgbs_104999.1.59	5A	242134386
avgbs_105014.1.29	7D	168562730
avgbs_105036.1.63	7D	163231353
avgbs_105087.1.26	Unk	NA
avgbs_105116.1.22	5D	455986000
avgbs_105121.1.48	3D	160810234
avgbs_105161.1.13	7D	74434871
avgbs_105177.1.53	7D	148562336
avgbs_105200.1.15	6D	225953691
avgbs_105255.1.21	1C	408046865
avgbs_105348.1.14	1C	176944294
avgbs_105377.1.56	1C	342205156
avgbs_105378.1.51	1C	348978778
avgbs_105387.1.18	Unk	NA
avgbs_105508.1.63	7D	363619402
avgbs_105545.1.14	2C	556625169
avgbs_105557.1.26	7D	257380586
avgbs_10556.1.25	6A	322484688
avgbs_105598.1.22	2C	556196688
avgbs_10567.1.64	5D	414911638
avgbs_10568.1.10	6D	123736198
avgbs_10569.1.14	6A	409955674
avgbs_10571.1.51	7C	689745268
avgbs_105757.1.57	2D	99959443
avgbs_105765.1.50	3D	434811685
avgbs_105768.1.20	1A	463388977
avgbs_105799.1.60	7D	433037285
avgbs_10582.1.41	1A	361302662
avgbs_105944.1.39	1D	368116492
avgbs_106036.1.56	6D	242202677
avgbs_106062.1.25	7D	289260472
avgbs_106063.1.52	7D	262965918
avgbs_106064.1.46	5A	122313339
avgbs_106149.1.46	1C	64700328
avgbs_10627.1.18	6D	281571294
avgbs_106370.1.19	1C	75628990
avgbs_106376.1.44	6A	316134459
avgbs_106389.1.58	5A	226962533
avgbs_106442.1.15	7D	232977889
avgbs_106476.1.61	7D	301434147
avgbs_106477.1.64	7D	329083168
avgbs_106590.1.49	5A	193808302
avgbs_106690.1.23	2D	348883365
avgbs_106781.1.54	7D	74566406
avgbs_106786.1.7	5A	221155682
avgbs_10687.1.17	5A	446592655
avgbs_106923.1.22	Unk	NA
avgbs_107044.1.24	4D	241483653
avgbs_107198.1.20	1C	112280399
avgbs_107268.1.13	6C	100344195
avgbs_107285.1.37	1C	43694745
avgbs_107346.1.59	1C	136515408
avgbs_10738.1.44	1C	117890208
avgbs_1074.1.45	1A	451481587
avgbs_107431.1.8	6D	274797043
avgbs_107516.1.48	7D	275293443
avgbs_107561.1.38	7D	243705383
avgbs_107604.1.15	4D	371006128
avgbs_107680.1.8	1A	264287612
avgbs_107700.1.8	6C	595261850
avgbs_107766.1.8	7D	68501810
avgbs_107767.1.27	7D	87418125
avgbs_107845.1.43	Unk	NA
avgbs_107873.1.15	5A	449142102
avgbs_10790.1.24	1C	152098568
avgbs_107954.1.52	5A	304199336
avgbs_107990.1.34	1A	328810232
avgbs_108120.1.54	6A	403029420
avgbs_10814.1.8	Unk	NA
avgbs_108171.1.21	5A	446811211
avgbs_108208.1.44	6C	576629672
avgbs_108286.1.46	7D	244937466
avgbs_108374.1.10	6C	559699647
avgbs_108532.1.26	5A	302996388
avgbs_108610.1.39	1A	430091919
avgbs_108617.1.28	Unk	NA
avgbs_108678.1.45	2D	348633056
avgbs_10888.1.53	7D	301072461
avgbs_108935.1.57	6C	540119000
avgbs_108936.1.10	1A	321973928
avgbs_108975.1.35	7D	39334191
avgbs_10899.1.54	7D	475063691
avgbs_10904.1.12	6C	543243738
avgbs_109056.1.32	6D	271615818
avgbs_109085.1.21	6C	551552217
avgbs_109107.1.18	6C	527755242
avgbs_109181.1.33	5A	437340256
avgbs_109188.1.38	Unk	NA
avgbs_109190.1.45	5A	248938643
avgbs_10920.1.21	6C	600831094
avgbs_109207.1.60	6D	288775803
avgbs_109241.1.20	5A	160619880
avgbs_109260.1.32	7D	4172556
avgbs_109293.1.57	7D	35030168
avgbs_109320.1.61	7A	455990746
avgbs_109366.1.60	1A	326107791
avgbs_109423.1.62	5A	261915271
avgbs_109439.1.17	6C	580263406
avgbs_109610.1.24	6C	548452709
avgbs_109660.1.54	2D	337646347
avgbs_109677.1.32	1D	427142590
avgbs_109685.1.60	1A	439198566
avgbs_109687.1.48	6C	571555294
avgbs_109707.1.13	7D	51930560
avgbs_109708.1.14	2C	557285608
avgbs_109735.1.26	6C	542215045
avgbs_10986.1.63	1D	357223250
avgbs_109872.1.31	1A	312548622
avgbs_109876.1.25	Unk	NA
avgbs_109911.1.30	5A	168067118
avgbs_109912.1.38	6C	532833452
avgbs_109913.1.36	5A	37175213
avgbs_109934.1.15	1D	374776851
avgbs_10997.1.57	3A	109313742
avgbs_109996.1.23	5A	234875810
avgbs_1101.1.16	5A	138926447
avgbs_110126.1.18	1C	203351012
avgbs_110127.1.18	Unk	NA
avgbs_110128.1.13	7D	384043116
avgbs_110172.1.13	1C	81594280
avgbs_110173.1.13	Unk	NA
avgbs_110246.1.37	7D	240711651
avgbs_110262.1.14	7D	174963940
avgbs_110267.1.39	7D	195207201
avgbs_110291.1.23	1C	395326615
avgbs_110306.1.10	7D	408094012
avgbs_110365.1.27	4D	360540867
avgbs_110383.1.11	1C	109086446
avgbs_110447.1.59	5A	33970600
avgbs_110454.1.10	5A	429988939
avgbs_110549.1.63	1A	321419798
avgbs_110601.1.60	6C	590781085
avgbs_110672.1.47	7D	275292180
avgbs_110789.1.13	4D	328657113
avgbs_110849.1.57	1C	123081132
avgbs_110854.1.61	1D	367843120
avgbs_110881.1.47	1D	357625468
avgbs_110925.1.36	6C	597777958
avgbs_110942.1.25	7D	341392719
avgbs_110948.1.60	7A	394887930
avgbs_110952.1.17	Unk	NA
avgbs_111018.1.28	7D	297028309
avgbs_111150.1.22	1C	382629176
avgbs_11117.1.18	7D	55071697
avgbs_111199.1.14	7D	403142751
avgbs_111286.1.36	1A	326602943
avgbs_111306.1.9	7D	331226159
avgbs_111543.1.40	1C	143872134
avgbs_111605.1.39	5A	423770199
avgbs_11168.1.18	1A	439196474
avgbs_111700.1.8	7D	109730789
avgbs_111743.1.21	6C	549089790
avgbs_111777.1.32	1A	405697652
avgbs_111873.1.20	1A	408765120
avgbs_112158.1.62	5A	121629993
avgbs_112257.1.57	1C	67755352
avgbs_112262.1.20	7A	477168256
avgbs_112310.1.32	7D	57127817
avgbs_112313.1.45	5A	116041300
avgbs_112323.1.34	1C	309602039
avgbs_112377.1.50	1D	380338279
avgbs_112445.1.8	5A	342783115
avgbs_112489.1.49	3C	553738090
avgbs_112632.1.57	6C	529819533
avgbs_112649.1.45	1C	302448810
avgbs_11269.1.13	6C	577067155
avgbs_112759.1.52	1C	259857953
avgbs_112780.1.14	3A	322318866
avgbs_112823.1.26	5A	46325798
avgbs_112898.1.18	1A	335121794
avgbs_112948.1.64	1C	387053385
avgbs_112958.1.58	5A	316022825
avgbs_112963.1.54	1C	60574679
avgbs_113110.1.15	1C	235404326
avgbs_113128.1.14	Unk	NA
avgbs_113165.1.11	2D	9919504
avgbs_113171.1.37	Unk	NA
avgbs_113325.1.8	1A	432912833
avgbs_113419.1.18	7D	483156396
avgbs_113459.1.24	Unk	NA
avgbs_113460.1.14	Unk	NA
avgbs_113548.1.52	7D	362813995
avgbs_113669.1.17	7A	459930464
avgbs_113824.1.61	7D	371931898
avgbs_113928.1.45	5A	438781845
avgbs_113963.1.8	1C	69779500
avgbs_114050.1.9	7D	3882552
avgbs_114059.1.44	5A	443282755
avgbs_114195.1.19	Unk	NA
avgbs_114204.1.20	5A	242863256
avgbs_114293.1.56	5A	382863565
avgbs_114329.1.29	Unk	NA
avgbs_114377.1.55	5A	136672088
avgbs_114489.1.33	1C	364559147
avgbs_114541.1.39	6D	257674456
avgbs_114864.1.62	7D	147434128
avgbs_114884.1.38	Unk	NA
avgbs_114918.1.33	7D	334401067
avgbs_114976.1.16	7D	138382229
avgbs_115010.1.20	1D	394114941
avgbs_11502.1.49	2D	338506893
avgbs_11503.1.40	7D	414164356
avgbs_115046.1.23	1A	440431285
avgbs_115081.1.9	1C	218375127
avgbs_115178.1.38	Unk	NA
avgbs_115244.1.38	1A	328156655
avgbs_115272.1.42	1A	330208285
avgbs_115302.1.12	6C	564184393
avgbs_115309.1.43	7A	286210711
avgbs_115453.1.20	1D	415456969
avgbs_115490.1.43	7A	408066785
avgbs_115605.1.64	1C	111160306
avgbs_115620.1.56	1A	463453462
avgbs_115691.1.24	7D	202823011
avgbs_115704.1.19	5A	236223460
avgbs_115818.1.18	6A	305442767
avgbs_11587.1.64	1D	366348406
avgbs_115964.1.16	5A	139484831
avgbs_116005.1.45	6C	133791501
avgbs_116047.1.50	Unk	NA
avgbs_116058.1.34	2C	549528909
avgbs_116103.1.25	7D	110039686
avgbs_116141.1.36	Unk	NA
avgbs_116164.1.52	6C	550209448
avgbs_116290.1.26	7D	433378445
avgbs_116334.1.46	7A	427829727
avgbs_116364.1.48	4D	217969912
avgbs_116365.1.10	6D	288490168
avgbs_116380.1.32	4D	241190627
avgbs_116384.1.55	1C	75672920
avgbs_116434.1.61	6C	594480915
avgbs_116543.1.25	7D	297803261
avgbs_11655.1.50	7D	417914804
avgbs_116595.1.15	5A	257036768
avgbs_116725.1.26	5A	300353660
avgbs_11674.1.36	6D	270433990
avgbs_116759.1.38	7D	168290285
avgbs_116939.1.17	Unk	NA
avgbs_116951.1.14	5A	291646554
avgbs_117057.1.50	1C	281013273
avgbs_11710.1.38	6C	574287888
avgbs_117103.1.37	1C	307936110
avgbs_117177.1.53	1A	414265078
avgbs_117232.1.46	7A	412820781
avgbs_1174.1.37	Unk	NA
avgbs_11742.1.55	7D	54940188
avgbs_117439.1.29	6D	288403227
avgbs_117508.1.26	7D	104559252
avgbs_117551.1.58	2C	555630705
avgbs_117784.1.43	5A	322089233
avgbs_117820.1.62	Unk	NA
avgbs_117853.1.12	5A	455330010
avgbs_117865.1.36	6A	402602568
avgbs_117985.1.58	1C	174003747
avgbs_118009.1.54	6A	409638350
avgbs_118078.1.60	6C	555378196
avgbs_118168.1.38	2D	10685092
avgbs_118202.1.52	6C	577099451
avgbs_118247.1.26	5A	137089328
avgbs_118248.1.26	5A	137089328
avgbs_118266.1.14	Unk	NA
avgbs_118278.1.38	5A	139864234
avgbs_118331.1.25	6C	527312970
avgbs_118363.1.64	1C	334778623
avgbs_118384.1.25	7D	386861422
avgbs_118527.1.55	2D	350005691
avgbs_118547.1.30	7D	182976958
avgbs_118549.1.28	6D	259354640
avgbs_118623.1.56	7D	238968494
avgbs_118634.1.12	1A	342323882
avgbs_118728.1.54	7D	414231024
avgbs_118819.1.59	1A	406441212
avgbs_118858.1.38	7A	394599377
avgbs_118903.1.39	5A	323835451
avgbs_119008.1.17	1C	238665407
avgbs_119019.1.62	1C	124163249
avgbs_119036.1.11	1A	414631207
avgbs_119046.1.23	1A	462728169
avgbs_119113.1.51	6D	225636771
avgbs_119137.1.43	5A	148398391
avgbs_119168.1.40	6C	558324829
avgbs_119181.1.56	Unk	NA
avgbs_119246.1.14	1D	363015834
avgbs_119277.1.31	7D	504039238
avgbs_119296.1.57	1C	141751247
avgbs_119323.1.43	1D	360092638
avgbs_119351.1.47	6C	535532992
avgbs_119392.1.50	5A	409253127
avgbs_119457.1.60	7D	315444035
avgbs_119584.1.16	1C	135638933
avgbs_119671.1.37	1C	57815908
avgbs_119774.1.39	6A	324945386
avgbs_119837.1.13	5A	139873879
avgbs_119840.1.37	2C	551151487
avgbs_119861.1.25	2D	8925609
avgbs_11993.1.21	5D	495269865
avgbs_119941.1.12	7D	175816237
avgbs_12010.1.17	1C	191689374
avgbs_120147.1.34	1C	175182435
avgbs_120170.1.11	3A	55742782
avgbs_120222.1.64	5A	127326311
avgbs_120256.1.52	7A	454723860
avgbs_120270.1.50	5A	292942036
avgbs_12031.1.60	1C	37934573
avgbs_120342.1.13	5A	114080193
avgbs_120378.1.14	6D	279180330
avgbs_120387.1.29	5A	448344801
avgbs_120436.1.16	7D	28910630
avgbs_120496.1.38	6D	284467812
avgbs_120587.1.35	7A	398438429
avgbs_120609.1.30	1C	328526162
avgbs_120648.1.62	5A	462130221
avgbs_120706.1.24	6A	328442958
avgbs_120721.1.8	7D	107935740
avgbs_120723.1.30	6C	594476387
avgbs_120835.1.54	7D	403815362
avgbs_120890.1.39	1A	428868908
avgbs_12091.1.49	2C	557679346
avgbs_120926.1.15	6C	541470158
avgbs_121000.1.29	7D	88138858
avgbs_121060.1.33	1C	347035111
avgbs_121098.1.34	7D	268393544
avgbs_121108.1.31	5A	344780094
avgbs_121198.1.64	7D	100478301
avgbs_121210.1.43	7D	168308089
avgbs_121228.1.42	5A	168348023
avgbs_12123.1.47	1C	152680134
avgbs_121444.1.11	Chr00	148507846
avgbs_121552.1.41	1D	389194332
avgbs_12159.1.52	5A	340899673
avgbs_121649.1.43	Unk	NA
avgbs_121982.1.20	6C	588267968
avgbs_122125.1.23	5A	33746262
avgbs_122204.1.38	5A	229668557
avgbs_122269.1.41	1C	121403905
avgbs_122346.1.16	Unk	NA
avgbs_122367.1.28	Unk	NA
avgbs_122437.1.44	1A	351821092
avgbs_122443.1.38	1C	7494593
avgbs_122643.1.35	6A	309039443
avgbs_122694.1.13	6C	558450245
avgbs_122814.1.30	7A	253796220
avgbs_122833.1.50	1C	300885972
avgbs_123234.1.11	1C	377029869
avgbs_123238.1.57	7D	418764305
avgbs_123299.1.24	6D	280426519
avgbs_123426.1.39	2C	547342421
avgbs_123429.1.47	5A	242442309
avgbs_123469.1.22	6C	558021867
avgbs_123698.1.22	7D	166796786
avgbs_123759.1.41	7A	446803821
avgbs_12383.1.19	7D	65194241
avgbs_123854.1.14	7D	320661695
avgbs_123918.1.14	Unk	NA
avgbs_124095.1.55	2D	110644257
avgbs_124115.1.16	1A	364234751
avgbs_124275.1.23	5A	303110990
avgbs_124292.1.27	1A	441548287
avgbs_124406.1.37	1C	46025340
avgbs_124461.1.24	1C	202771308
avgbs_124539.1.10	2C	12400210
avgbs_124611.1.34	5A	123180045
avgbs_12472.1.44	6D	236698416
avgbs_124905.1.54	7D	398987910
avgbs_124966.1.16	Unk	NA
avgbs_124979.1.36	5A	66016252
avgbs_124987.1.54	6D	280388677
avgbs_125050.1.36	2C	555590778
avgbs_125219.1.39	6C	544865594
avgbs_125332.1.13	6C	545299129
avgbs_125418.1.39	1C	37717921
avgbs_125450.1.29	7D	355829849
avgbs_125467.1.25	7A	444199732
avgbs_125524.1.18	7D	112537752
avgbs_125531.1.48	5A	258334400
avgbs_125532.1.57	7D	162874786
avgbs_125535.1.39	7D	10950614
avgbs_125536.1.63	7D	84190579
avgbs_125554.1.37	6D	279179895
avgbs_125571.1.16	3A	151400245
avgbs_125575.1.37	5A	235574173
avgbs_125682.1.54	1C	301356342
avgbs_125695.1.21	7D	341837716
avgbs_125748.1.60	1C	33557710
avgbs_125787.1.19	7D	307848501
avgbs_125800.1.38	6D	65790630
avgbs_125911.1.20	1C	64604375
avgbs_125983.1.20	7D	309954195
avgbs_126001.1.60	1C	151953955
avgbs_126033.1.13	1A	433438330
avgbs_126061.1.64	1D	357247761
avgbs_12607.1.28	7D	428766954
avgbs_126101.1.38	Unk	NA
avgbs_126112.1.50	5A	307416903
avgbs_126285.1.14	2C	550454141
avgbs_126329.1.49	5A	437959055
avgbs_12681.1.23	Unk	NA
avgbs_12694.1.59	Unk	NA
avgbs_12701.1.7	Unk	NA
avgbs_12751.1.53	5A	307407835
avgbs_12792.1.31	7D	51868260
avgbs_12865.1.26	7D	41261759
avgbs_13036.1.21	6C	552717564
avgbs_13142.1.54	6A	415993723
avgbs_13252.1.34	1A	408128326
avgbs_13383.1.29	Unk	NA
avgbs_13394.1.17	5A	164871963
avgbs_1344.1.21	5A	366048684
avgbs_13457.1.47	1C	382241263
avgbs_13458.1.17	1C	382239285
avgbs_13556.1.15	6A	328439427
avgbs_13609.1.48	6C	575585843
avgbs_13623.1.41	1D	300696058
avgbs_13629.1.42	5D	493922479
avgbs_13636.1.22	3C	554689127
avgbs_13640.1.10	1A	328889454
avgbs_13692.1.59	7D	16710426
avgbs_13757.1.41	1D	355085239
avgbs_13897.1.7	7A	487414304
avgbs_13917.1.6	5A	427658369
avgbs_14079.1.11	6D	264430510
avgbs_14102.1.21	5A	161378945
avgbs_14108.1.50	7A	471507742
avgbs_14124.1.61	1A	433727437
avgbs_1420.1.18	7D	397805756
avgbs_14389.1.64	7A	477953285
avgbs_14408.1.20	1D	432189727
avgbs_14420.1.44	6C	578179479
avgbs_14424.1.39	6C	560403794
avgbs_1443.1.28	1D	375482379
avgbs_14544.1.38	1C	170532253
avgbs_14608.1.32	1C	117945340
avgbs_14672.1.30	7D	207958677
avgbs_14872.1.57	1C	144461612
avgbs_14874.1.48	1C	280374607
avgbs_14969.1.14	5A	437018077
avgbs_151.1.56	Unk	NA
avgbs_15100.1.6	1C	290953151
avgbs_15110.1.33	7D	305976340
avgbs_15307.1.15	6D	271278205
avgbs_15348.1.10	Unk	NA
avgbs_15362.1.34	Unk	NA
avgbs_15369.1.35	4D	360438506
avgbs_15380.1.64	6A	409912499
avgbs_1539.1.20	7D	308832068
avgbs_15464.1.35	6A	316495645
avgbs_1547.1.6	6D	272997076
avgbs_15494.1.63	1A	364015934
avgbs_15546.1.25	1C	80636860
avgbs_15582.1.12	2C	549181703
avgbs_15630.1.19	5A	62925610
avgbs_15722.1.53	1C	134885124
avgbs_15752.1.8	6C	557731775
avgbs_15768.1.39	6C	597158545
avgbs_15832.1.12	1C	136982162
avgbs_15862.1.18	2C	558088930
avgbs_15892.1.41	1C	342423525
avgbs_15899.1.23	5A	116740337
avgbs_16004.1.59	5A	105823099
avgbs_16037.1.27	7D	413761645
avgbs_161.1.18	6C	560680569
avgbs_16236.1.16	1C	26001022
avgbs_16306.1.47	6C	551170341
avgbs_16325.1.17	1C	310674972
avgbs_16348.1.19	6C	584551591
avgbs_16451.1.64	6C	551649662
avgbs_16550.1.41	1C	85238331
avgbs_16590.1.63	5A	312130829
avgbs_16594.1.29	7D	242937974
avgbs_16595.1.20	5A	264482693
avgbs_1664.1.32	6C	572586232
avgbs_16698.1.33	7D	55881484
avgbs_16715.1.9	1C	354756795
avgbs_1673.1.11	3D	369570422
avgbs_1676.1.8	7D	37582358
avgbs_168.1.19	6C	557175767
avgbs_16800.1.55	Unk	NA
avgbs_16827.1.57	2C	11346829
avgbs_16946.1.36	6A	311075208
avgbs_16959.1.18	5A	262913200
avgbs_16990.1.6	6C	601214871
avgbs_170.1.25	1C	157896443
avgbs_17028.1.13	7D	327026381
avgbs_17037.1.22	2D	39184728
avgbs_17064.1.10	6C	543625605
avgbs_17066.1.31	1A	449698845
avgbs_17102.1.6	6C	74288287
avgbs_17132.1.42	5A	233349386
avgbs_17181.1.9	7D	320825793
avgbs_17348.1.34	6A	321557272
avgbs_17369.1.16	5A	161325560
avgbs_17490.1.61	7D	240367403
avgbs_17495.1.46	7D	53645680
avgbs_17540.1.14	7D	309589247
avgbs_17674.1.15	1C	20439896
avgbs_17691.1.10	5A	456470870
avgbs_17733.1.45	5A	249170330
avgbs_17848.1.59	5A	140286306
avgbs_17850.1.33	3A	282701349
avgbs_17929.1.58	5A	257173457
avgbs_17941.1.57	7D	143772821
avgbs_17950.1.57	7D	57900908
avgbs_17997.1.61	7D	484874954
avgbs_18008.1.42	2C	549750437
avgbs_18019.1.22	2C	547880712
avgbs_18111.1.28	7D	116482234
avgbs_18117.1.34	5A	316292202
avgbs_18125.1.29	5A	128871350
avgbs_18184.1.61	5A	300973622
avgbs_18221.1.12	5A	295377248
avgbs_18270.1.11	1A	453976662
avgbs_18271.1.40	1C	304159377
avgbs_18305.1.13	6D	209265408
avgbs_18313.1.41	6D	276145971
avgbs_18314.1.47	7D	253285345
avgbs_18322.1.32	5A	243469200
avgbs_18341.1.13	Unk	NA
avgbs_18345.1.26	5A	189035956
avgbs_18371.1.23	7D	288944653
avgbs_18375.1.57	7D	361334887
avgbs_18408.1.47	5A	196662025
avgbs_1850.1.28	7A	467798046
avgbs_18503.1.37	6C	536603775
avgbs_18565.1.63	7D	28910556
avgbs_18586.1.6	7D	307103021
avgbs_18592.1.6	2C	555000613
avgbs_18601.1.26	2C	540154344
avgbs_18681.1.50	5A	160269949
avgbs_18732.1.26	1D	380904869
avgbs_18738.1.28	7A	458197735
avgbs_18807.1.64	1C	208768593
avgbs_18811.1.59	6C	543103967
avgbs_18960.1.17	Chr00	122813063
avgbs_19022.1.45	6D	264011378
avgbs_19044.1.55	1C	51509436
avgbs_19045.1.12	1D	400076767
avgbs_19066.1.58	3C	554266774
avgbs_19081.1.18	5A	117343284
avgbs_19097.1.39	7D	318459276
avgbs_19209.1.30	1C	207097169
avgbs_19291.1.20	5A	142211009
avgbs_19360.1.6	2C	557612628
avgbs_19492.1.37	Chr00	73578807
avgbs_19532.1.59	3A	211513910
avgbs_19632.1.25	6D	287629462
avgbs_19664.1.34	7D	474426707
avgbs_1968.1.61	7A	127605313
avgbs_19684.1.60	5A	43051252
avgbs_19690.1.55	1C	12537290
avgbs_19742.1.14	2C	9265186
avgbs_19789.1.32	1C	256793545
avgbs_19826.1.32	5A	164376368
avgbs_19846.1.13	2C	542138385
avgbs_19850.1.16	6C	594058301
avgbs_19863.1.48	Unk	NA
avgbs_200009.1.47	7D	408200555
avgbs_200099.1.60	7D	483534749
avgbs_200102.1.61	5A	261240276
avgbs_200103.1.61	7D	223010593
avgbs_200124.1.52	7D	433353223
avgbs_200203.1.49	5A	174367967
avgbs_200309.1.16	6D	286841205
avgbs_200399.1.62	5A	175824346
avgbs_200406.1.33	Unk	NA
avgbs_200486.1.64	5A	158647576
avgbs_200537.1.21	6A	321781612
avgbs_200586.1.55	6C	593799854
avgbs_200634.1.13	Unk	NA
avgbs_20064.1.55	1A	307820948
avgbs_200644.1.62	7D	149880089
avgbs_200650.1.41	7D	408252179
avgbs_20074.1.30	7D	383385593
avgbs_200788.1.46	7D	372766172
avgbs_200816.1.27	5A	201803910
avgbs_201020.1.26	6C	595038072
avgbs_20103.1.51	3C	550081991
avgbs_201066.1.25	7D	253793282
avgbs_201116.1.9	6A	412650893
avgbs_201642.1.47	Unk	NA
avgbs_201648.1.13	7D	484860395
avgbs_201667.1.32	Unk	NA
avgbs_201697.1.17	5A	167345498
avgbs_201762.1.27	1D	391573777
avgbs_201770.1.42	7D	280992561
avgbs_201782.1.34	7D	414091505
avgbs_202011.1.9	7D	35336769
avgbs_202042.1.64	7D	192870594
avgbs_202114.1.22	7D	396629044
avgbs_202148.1.59	7D	203647794
avgbs_202348.1.29	7A	462598858
avgbs_202363.1.32	Unk	NA
avgbs_202497.1.62	6C	524433202
avgbs_202531.1.61	6D	274633086
avgbs_202617.1.58	6C	565850770
avgbs_202622.1.31	Unk	NA
avgbs_202657.1.23	2C	541872315
avgbs_202663.1.60	1C	274939047
avgbs_202711.1.38	1C	139577391
avgbs_202725.1.51	6C	543830042
avgbs_202833.1.9	1C	318609803
avgbs_202924.1.57	7D	255427966
avgbs_202999.1.40	7D	182964050
avgbs_203037.1.37	6A	330579032
avgbs_203075.1.15	Unk	NA
avgbs_203131.1.27	Unk	NA
avgbs_203303.1.36	1D	373076430
avgbs_20333.1.36	1C	347133880
avgbs_203330.1.40	5A	313211456
avgbs_203396.1.48	7A	408648156
avgbs_203435.1.63	1C	132355635
avgbs_203561.1.37	6C	584327770
avgbs_203640.1.37	4A	390657144
avgbs_20371.1.42	7D	165048134
avgbs_203790.1.58	7D	59114497
avgbs_203832.1.54	7D	234106208
avgbs_203907.1.36	6D	261593834
avgbs_203980.1.58	1A	305444893
avgbs_204130.1.63	3D	363609607
avgbs_204165.1.45	7D	222070681
avgbs_204261.1.63	5A	426293831
avgbs_204291.1.53	1C	345848532
avgbs_204450.1.23	Unk	NA
avgbs_204489.1.25	7D	227281462
avgbs_204498.1.37	1C	114766779
avgbs_20456.1.14	5A	241993272
avgbs_204602.1.30	7D	324366436
avgbs_204608.1.32	7A	483989605
avgbs_204699.1.46	Unk	NA
avgbs_204743.1.24	1D	383657548
avgbs_204749.1.59	7D	313795733
avgbs_204771.1.42	Unk	NA
avgbs_204774.1.48	7A	443437984
avgbs_204844.1.50	3A	68397249
avgbs_204930.1.27	Unk	NA
avgbs_205060.1.62	6C	581393040
avgbs_20510.1.30	7D	241596306
avgbs_205123.1.22	1C	290228285
avgbs_205330.1.48	5A	131346557
avgbs_205331.1.29	Unk	NA
avgbs_205337.1.17	5A	431328511
avgbs_205624.1.44	Unk	NA
avgbs_205702.1.11	Unk	NA
avgbs_205723.1.37	7D	109808659
avgbs_205824.1.61	Unk	NA
avgbs_205869.1.53	5D	495253007
avgbs_205936.1.23	Unk	NA
avgbs_205937.1.31	2C	556777946
avgbs_20597.1.58	1A	447641753
avgbs_205995.1.52	7D	353318208
avgbs_20600.1.57	5A	198697489
avgbs_206077.1.13	5A	428581630
avgbs_2061.1.14	1C	205169120
avgbs_206170.1.30	7D	119055046
avgbs_206267.1.18	7D	181685734
avgbs_206286.1.29	7D	22964225
avgbs_206361.1.30	2C	541475709
avgbs_206523.1.32	6C	538353695
avgbs_206674.1.43	7D	376412308
avgbs_206718.1.14	7D	159949470
avgbs_206748.1.23	7D	163291294
avgbs_206909.1.53	7D	406415866
avgbs_206981.1.44	6C	529647031
avgbs_207277.1.18	6D	258183404
avgbs_207500.1.60	5A	294774317
avgbs_207640.1.33	Unk	NA
avgbs_207674.1.19	Unk	NA
avgbs_207678.1.33	7D	486678827
avgbs_207711.1.22	7A	450324667
avgbs_20787.1.56	6C	94356556
avgbs_207966.1.25	6D	252623102
avgbs_208084.1.64	7D	499872253
avgbs_208213.1.48	7D	179060690
avgbs_208234.1.56	2A	447327701
avgbs_208276.1.36	7D	303446014
avgbs_208304.1.25	6C	562875491
avgbs_208321.1.24	7D	291967924
avgbs_208325.1.46	7D	256393493
avgbs_2085.1.20	5A	237782676
avgbs_20875.1.48	1D	361285870
avgbs_20905.1.58	2C	557215371
avgbs_209063.1.64	5A	276636896
avgbs_209193.1.43	5A	240671514
avgbs_20952.1.53	1A	347217385
avgbs_209714.1.48	5A	264395847
avgbs_209726.1.43	5A	302508637
avgbs_210048.1.29	7D	117126428
avgbs_210076.1.21	5A	198079051
avgbs_210078.1.33	1D	96608579
avgbs_210137.1.24	5A	289341787
avgbs_210175.1.41	5A	112270040
avgbs_210215.1.41	7D	420910959
avgbs_210456.1.54	6A	408969904
avgbs_210512.1.40	5A	156911684
avgbs_21054.1.17	Unk	NA
avgbs_210582.1.60	5A	202702599
avgbs_21067.1.17	5D	150085652
avgbs_2108.1.35	Unk	NA
avgbs_210997.1.39	5A	192441938
avgbs_21100.1.51	2C	558063868
avgbs_211196.1.19	6D	287581707
avgbs_211612.1.32	4D	374946130
avgbs_211620.1.24	4D	360693727
avgbs_211629.1.50	5A	136781935
avgbs_211656.1.50	7D	410875998
avgbs_211780.1.62	5A	236174300
avgbs_21205.1.33	5D	496092411
avgbs_21207.1.23	Unk	NA
avgbs_212102.1.56	7D	257046033
avgbs_212146.1.45	7D	140731897
avgbs_212219.1.64	7D	375143337
avgbs_212332.1.50	2D	349581056
avgbs_212359.1.40	6C	70681842
avgbs_21250.1.30	7D	153126167
avgbs_213004.1.38	5A	201718432
avgbs_21308.1.15	1C	298616661
avgbs_213088.1.54	2D	335847323
avgbs_213138.1.61	5D	457725022
avgbs_213146.1.62	2C	10395888
avgbs_213320.1.34	Unk	NA
avgbs_213342.1.24	Unk	NA
avgbs_213346.1.27	7D	121675260
avgbs_21338.1.19	2D	55050334
avgbs_213393.1.48	6D	250155661
avgbs_213401.1.47	7A	407990108
avgbs_213448.1.50	2C	550204589
avgbs_213482.1.63	2A	410212756
avgbs_213543.1.30	Unk	NA
avgbs_21357.1.10	2C	9458304
avgbs_213632.1.42	Unk	NA
avgbs_213768.1.55	2D	337832675
avgbs_213771.1.34	5A	196909327
avgbs_213777.1.24	Unk	NA
avgbs_21388.1.51	5A	188490795
avgbs_213929.1.44	2C	556207002
avgbs_213965.1.21	1C	174599929
avgbs_214038.1.28	6C	543141561
avgbs_21414.1.36	1A	460883875
avgbs_214156.1.56	7D	141562366
avgbs_214158.1.18	Unk	NA
avgbs_21418.1.58	2C	556660349
avgbs_214236.1.49	7D	364488124
avgbs_214265.1.20	7C	473196254
avgbs_214316.1.10	Unk	NA
avgbs_21434.1.6	7D	201306767
avgbs_214395.1.26	7D	404819847
avgbs_214408.1.41	6A	329956428
avgbs_214508.1.52	2D	216084168
avgbs_214531.1.47	7D	222359453
avgbs_214577.1.9	5A	260021643
avgbs_214627.1.16	2D	78031736
avgbs_214676.1.57	2C	540379696
avgbs_214752.1.21	Unk	NA
avgbs_214794.1.40	2D	225733203
avgbs_214827.1.44	7A	490150198
avgbs_214831.1.41	5D	457006994
avgbs_214838.1.56	1C	118786928
avgbs_214868.1.15	Unk	NA
avgbs_21496.1.36	1C	210767316
avgbs_21501.1.33	6C	573511209
avgbs_215105.1.18	7D	246430031
avgbs_215160.1.44	Unk	NA
avgbs_215254.1.53	5A	190874646
avgbs_215457.1.56	7D	263713218
avgbs_215462.1.51	7D	470771154
avgbs_215484.1.34	Unk	NA
avgbs_215574.1.28	7D	150063431
avgbs_215596.1.19	Unk	NA
avgbs_215612.1.11	6C	553257604
avgbs_215652.1.41	1C	14304619
avgbs_215802.1.28	5A	302227563
avgbs_215812.1.59	2A	409625253
avgbs_215828.1.59	1C	57779417
avgbs_215859.1.22	7D	340428681
avgbs_215893.1.60	7A	492273226
avgbs_215913.1.31	5A	65990093
avgbs_215968.1.26	Unk	NA
avgbs_216100.1.16	Unk	NA
avgbs_216102.1.62	6D	283318071
avgbs_216132.1.60	5A	172807258
avgbs_216182.1.64	2C	540792419
avgbs_216255.1.49	2C	7034872
avgbs_216314.1.20	7D	368941504
avgbs_216583.1.62	5C	534591189
avgbs_21659.1.36	1C	55735530
avgbs_21666.1.42	1A	512948195
avgbs_21671.1.42	1A	463511824
avgbs_216822.1.31	Unk	NA
avgbs_21690.1.29	Unk	NA
avgbs_216923.1.33	1A	360798571
avgbs_21697.1.9	Unk	NA
avgbs_217027.1.62	5A	199670875
avgbs_217135.1.38	Unk	NA
avgbs_21744.1.25	Unk	NA
avgbs_217513.1.12	7C	697690660
avgbs_217627.1.32	7D	494294921
avgbs_2177.1.48	1D	375132088
avgbs_21793.1.42	7D	174373755
avgbs_21827.1.23	1A	442000592
avgbs_218447.1.36	7D	69664350
avgbs_218503.1.56	1A	331963312
avgbs_21851.1.38	1C	415033821
avgbs_218854.1.53	6C	546976870
avgbs_21898.1.28	Unk	NA
avgbs_219021.1.57	2C	539659644
avgbs_219154.1.13	1C	53328053
avgbs_21917.1.62	1C	266976816
avgbs_21919.1.6	6C	557002713
avgbs_21959.1.19	1A	438688178
avgbs_219991.1.17	Unk	NA
avgbs_220161.1.20	6C	554806987
avgbs_22041.1.19	1C	142288018
avgbs_22042.1.50	1C	107166083
avgbs_220423.1.53	5D	495595177
avgbs_220461.1.17	6C	595262079
avgbs_22054.1.46	6C	574930648
avgbs_22070.1.13	Unk	NA
avgbs_221243.1.35	Unk	NA
avgbs_22182.1.8	1D	361313702
avgbs_221928.1.27	2C	555480137
avgbs_221983.1.41	Unk	NA
avgbs_222057.1.38	7D	499380232
avgbs_222876.1.56	5D	493843387
avgbs_222903.1.53	Unk	NA
avgbs_222944.1.36	6C	558204773
avgbs_223182.1.39	Unk	NA
avgbs_223186.1.44	Unk	NA
avgbs_223236.1.15	Unk	NA
avgbs_223247.1.41	7D	418270991
avgbs_223253.1.8	Unk	NA
avgbs_223268.1.46	1C	116176492
avgbs_223278.1.54	1C	92472631
avgbs_22329.1.14	7D	360505098
avgbs_223316.1.55	1C	349656054
avgbs_223324.1.58	1C	99237867
avgbs_223395.1.14	Unk	NA
avgbs_223431.1.27	6D	261734712
avgbs_223448.1.31	Unk	NA
avgbs_223451.1.39	1D	428302614
avgbs_223459.1.41	1C	38191526
avgbs_223508.1.44	1A	450637050
avgbs_223527.1.49	1A	457136585
avgbs_223540.1.61	1A	432500539
avgbs_223551.1.46	1A	462084716
avgbs_223576.1.22	1C	124032489
avgbs_223600.1.56	1C	393874420
avgbs_223602.1.49	1C	64032570
avgbs_223652.1.61	1C	107850131
avgbs_223661.1.23	1A	426866490
avgbs_223672.1.51	1C	390492184
avgbs_223688.1.54	1C	100167440
avgbs_22370.1.52	7C	722467412
avgbs_223706.1.12	Unk	NA
avgbs_223719.1.29	1C	51314121
avgbs_223763.1.15	7D	199401947
avgbs_22380.1.39	5A	310437169
avgbs_223838.1.57	7D	342216826
avgbs_223880.1.58	1C	215955597
avgbs_223908.1.44	1D	394132723
avgbs_22392.1.64	6A	409312103
avgbs_223985.1.51	1C	272397552
avgbs_224022.1.39	Unk	NA
avgbs_224050.1.22	Unk	NA
avgbs_224065.1.50	1C	154095378
avgbs_224095.1.18	Unk	NA
avgbs_224123.1.19	7D	205940958
avgbs_224126.1.64	1C	149498448
avgbs_224130.1.63	1C	217155473
avgbs_224151.1.61	1C	151575465
avgbs_224165.1.40	Unk	NA
avgbs_224177.1.37	1C	310381655
avgbs_224182.1.48	1C	263398442
avgbs_224186.1.51	Unk	NA
avgbs_224192.1.49	1C	213317460
avgbs_224221.1.61	1A	434064229
avgbs_224222.1.55	Unk	NA
avgbs_224236.1.31	Unk	NA
avgbs_224269.1.54	1C	368400202
avgbs_224293.1.35	1C	369808860
avgbs_224373.1.52	7D	435451973
avgbs_22438.1.17	1D	341912528
avgbs_224429.1.54	1C	65115549
avgbs_224456.1.49	1C	245119522
avgbs_224510.1.28	1A	395638459
avgbs_224511.1.22	Unk	NA
avgbs_224513.1.57	5A	132544530
avgbs_224532.1.54	1C	107851337
avgbs_224561.1.9	Unk	NA
avgbs_224562.1.48	1C	310120921
avgbs_224595.1.39	Chr00	113515907
avgbs_224596.1.26	1C	354123879
avgbs_224617.1.36	1C	376252164
avgbs_224622.1.58	1C	185528336
avgbs_224639.1.45	1A	352202288
avgbs_224650.1.18	1C	133202671
avgbs_22466.1.35	5A	137820249
avgbs_224718.1.18	1A	451389671
avgbs_224736.1.63	1C	396546078
avgbs_224754.1.47	Unk	NA
avgbs_224765.1.14	1C	13745705
avgbs_224766.1.54	7D	486426493
avgbs_224774.1.42	1C	115600245
avgbs_224778.1.60	1C	102717355
avgbs_224792.1.49	1C	60518723
avgbs_224796.1.59	1A	434004834
avgbs_224801.1.54	1C	387631676
avgbs_224823.1.10	Unk	NA
avgbs_224865.1.20	7D	126898537
avgbs_224870.1.31	Unk	NA
avgbs_224900.1.56	1C	354776901
avgbs_224912.1.29	1C	200904569
avgbs_224959.1.48	1C	235831629
avgbs_224970.1.21	1A	416290073
avgbs_22499.1.43	7D	382887444
avgbs_224996.1.31	5A	144269801
avgbs_22500.1.21	5A	303144331
avgbs_225024.1.29	Unk	NA
avgbs_225027.1.53	1D	359166704
avgbs_225031.1.41	Unk	NA
avgbs_22504.1.21	2D	201295431
avgbs_225052.1.27	1C	46446981
avgbs_225072.1.43	1C	235438571
avgbs_225119.1.7	1C	408685750
avgbs_225151.1.45	1A	439124214
avgbs_225249.1.20	1C	103886316
avgbs_22525.1.38	7D	89303353
avgbs_225253.1.41	Unk	NA
avgbs_225263.1.60	1C	76287679
avgbs_225282.1.45	1C	86033967
avgbs_225311.1.32	1C	366354344
avgbs_225312.1.27	Unk	NA
avgbs_225324.1.59	7D	486440492
avgbs_225334.1.54	1A	432733495
avgbs_225366.1.37	1C	115675347
avgbs_225428.1.34	1C	212756315
avgbs_225444.1.63	1C	369161523
avgbs_225541.1.7	7D	355155340
avgbs_225542.1.62	1C	107222105
avgbs_22561.1.64	1A	450454003
avgbs_225618.1.49	1C	17213007
avgbs_225655.1.46	1D	356984527
avgbs_225664.1.32	5D	494074407
avgbs_225670.1.44	1C	306921241
avgbs_225677.1.63	1C	334702327
avgbs_225716.1.63	1D	277356046
avgbs_22572.1.8	5A	245368453
avgbs_225732.1.24	1C	393626672
avgbs_225756.1.46	Unk	NA
avgbs_22580.1.6	1C	99521951
avgbs_225834.1.61	5A	341187047
avgbs_225853.1.42	1C	84603924
avgbs_22632.1.21	7D	154123617
avgbs_226656.1.40	5A	43081027
avgbs_226864.1.64	6D	276719066
avgbs_22760.1.10	Unk	NA
avgbs_228666.1.55	7D	355829928
avgbs_228829.1.63	6D	277016490
avgbs_228854.1.49	Unk	NA
avgbs_22916.1.18	1C	302707706
avgbs_229227.1.33	Unk	NA
avgbs_22959.1.10	1C	168527393
avgbs_22960.1.10	Unk	NA
avgbs_22997.1.15	7D	152916672
avgbs_22999.1.57	5A	137185346
avgbs_230028.1.60	6C	527006534
avgbs_230353.1.62	1D	361394794
avgbs_230365.1.27	Unk	NA
avgbs_230474.1.17	5A	27922300
avgbs_230737.1.45	Unk	NA
avgbs_23089.1.61	1C	408484777
avgbs_23128.1.25	1A	324104016
avgbs_231817.1.29	5A	41172103
avgbs_23185.1.30	7A	476978192
avgbs_231918.1.40	7A	470825591
avgbs_232.1.42	1C	72218590
avgbs_232838.1.49	1C	54436886
avgbs_233008.1.8	5A	264004212
avgbs_23338.1.31	1A	443057462
avgbs_23360.1.20	7D	288252148
avgbs_233658.1.40	7D	165515904
avgbs_233852.1.37	Unk	NA
avgbs_23430.1.25	5A	269390050
avgbs_2348.1.14	1D	428390531
avgbs_234995.1.27	1C	147690491
avgbs_235354.1.47	7A	19913954
avgbs_235485.1.51	7D	309642623
avgbs_235534.1.8	2C	547810083
avgbs_235587.1.53	7D	156669638
avgbs_235629.1.62	7D	162561504
avgbs_235885.1.41	5A	458975578
avgbs_235979.1.30	2C	558362511
avgbs_236136.1.23	1C	295556736
avgbs_236781.1.10	7D	163744208
avgbs_237162.1.29	2D	114465610
avgbs_237203.1.12	6A	330004777
avgbs_237307.1.34	7D	38527727
avgbs_23739.1.51	4D	226287237
avgbs_237653.1.21	5A	436591369
avgbs_237693.1.58	6C	593632583
avgbs_237731.1.45	4D	122383087
avgbs_23819.1.19	1C	242094738
avgbs_23821.1.33	1C	55280574
avgbs_238480.1.54	7D	248356468
avgbs_238484.1.45	7D	305180728
avgbs_238688.1.42	7D	151510497
avgbs_238717.1.56	7D	214337179
avgbs_238733.1.39	7D	191538176
avgbs_238749.1.18	7D	31405126
avgbs_238841.1.41	Unk	NA
avgbs_238954.1.46	1C	263109587
avgbs_239148.1.12	Unk	NA
avgbs_239310.1.23	7D	255670103
avgbs_239406.1.36	7D	117430283
avgbs_23951.1.24	Unk	NA
avgbs_239667.1.20	7A	432234861
avgbs_23968.1.42	5D	495885707
avgbs_23992.1.58	7A	439813854
avgbs_240217.1.61	7D	37074528
avgbs_240440.1.53	7D	387945679
avgbs_24050.1.30	7D	174636983
avgbs_240828.1.45	4D	226300294
avgbs_240988.1.48	Unk	NA
avgbs_2412.1.53	7D	410878839
avgbs_24126.1.8	5A	237864565
avgbs_241406.1.63	7D	50892246
avgbs_24146.1.32	1C	216742196
avgbs_241503.1.35	2C	541153333
avgbs_241634.1.56	2C	547798758
avgbs_241635.1.15	7D	142933123
avgbs_24175.1.32	1C	221136908
avgbs_242053.1.24	5A	232446759
avgbs_242114.1.20	5A	279653723
avgbs_24223.1.32	6D	227434042
avgbs_242468.1.58	7D	42220709
avgbs_2426.1.46	6D	272270425
avgbs_24267.1.44	5A	251563819
avgbs_242851.1.33	5D	493518462
avgbs_24305.1.54	6A	315251703
avgbs_243341.1.39	Unk	NA
avgbs_243454.1.50	6C	566838215
avgbs_243586.1.9	7D	212477416
avgbs_24461.1.6	7A	432044495
avgbs_244773.1.17	6C	571232990
avgbs_24496.1.16	5A	171300676
avgbs_245200.1.51	5A	185293836
avgbs_245240.1.58	7D	405171180
avgbs_245265.1.6	6C	585179546
avgbs_245351.1.17	5A	242729017
avgbs_245387.1.25	1A	388904955
avgbs_24547.1.20	7C	700518010
avgbs_245489.1.52	1D	388186171
avgbs_245572.1.9	5A	240665842
avgbs_245651.1.63	6C	573074785
avgbs_245659.1.26	1A	349139566
avgbs_245710.1.15	6C	595383967
avgbs_24592.1.52	1C	277709639
avgbs_245967.1.9	1A	392062990
avgbs_24598.1.26	5A	277447265
avgbs_246042.1.15	5A	242519100
avgbs_246075.1.54	2A	322422556
avgbs_246121.1.22	Chr00	43244260
avgbs_24619.1.61	6C	587552590
avgbs_246339.1.53	6D	257839890
avgbs_246387.1.39	7A	462204918
avgbs_246398.1.38	6D	154379925
avgbs_246430.1.33	5A	153192335
avgbs_246462.1.35	1D	386360242
avgbs_246584.1.41	1A	372442831
avgbs_246732.1.49	6C	544860236
avgbs_246762.1.21	5A	87156131
avgbs_246765.1.49	5A	133371952
avgbs_246961.1.61	7C	717955097
avgbs_247024.1.18	6D	250676683
avgbs_247044.1.50	1D	359490073
avgbs_247068.1.18	2D	525263017
avgbs_247246.1.46	6C	542565406
avgbs_247310.1.22	1D	356798638
avgbs_24737.1.45	7D	341530847
avgbs_24738.1.8	Unk	NA
avgbs_247380.1.41	6D	255294487
avgbs_247428.1.27	6D	254667920
avgbs_247709.1.31	1A	354597303
avgbs_247767.1.6	7C	695331245
avgbs_24804.1.18	6C	565027833
avgbs_248053.1.22	6C	574930711
avgbs_248501.1.11	6C	603314344
avgbs_24920.1.56	7D	39291112
avgbs_25011.1.20	1A	104016564
avgbs_25034.1.39	Unk	NA
avgbs_25128.1.40	1A	345637233
avgbs_25155.1.48	3A	350338218
avgbs_2516.1.8	2D	349643742
avgbs_25213.1.16	7D	359736840
avgbs_25244.1.12	1C	73774205
avgbs_25247.1.64	1C	377945641
avgbs_25317.1.26	1C	381855872
avgbs_25356.1.33	1A	314287324
avgbs_25357.1.57	Chr00	61170030
avgbs_2544.1.54	7D	283999269
avgbs_25533.1.60	7D	126362906
avgbs_25565.1.16	7D	299275160
avgbs_25796.1.41	1C	382522823
avgbs_25897.1.9	6A	423020476
avgbs_25902.1.59	1C	75076719
avgbs_25939.1.53	7D	25549715
avgbs_25959.1.31	5A	166960020
avgbs_25999.1.51	7D	176568832
avgbs_26049.1.14	6D	273494318
avgbs_26103.1.40	1C	140153867
avgbs_26152.1.57	Unk	NA
avgbs_262211.1.22	6C	584037986
avgbs_26226.1.34	6D	273933991
avgbs_26308.1.12	6D	277071594
avgbs_26366.1.21	1A	448145745
avgbs_26554.1.33	2D	55185402
avgbs_26617.1.53	6C	558724327
avgbs_267315.1.28	Unk	NA
avgbs_26738.1.47	Unk	NA
avgbs_26755.1.9	7D	24136430
avgbs_26756.1.52	6D	287231271
avgbs_26809.1.48	6C	562237210
avgbs_2685.1.55	1C	11848236
avgbs_2686.1.48	1C	291134711
avgbs_26878.1.16	1A	457834573
avgbs_26906.1.10	2D	338876464
avgbs_26907.1.10	Unk	NA
avgbs_26918.1.60	6D	281200406
avgbs_2692.1.62	7D	101391151
avgbs_26923.1.8	Unk	NA
avgbs_27055.1.29	6D	262527926
avgbs_27107.1.17	7D	207678352
avgbs_271316.1.61	5D	395377810
avgbs_27196.1.13	1A	372130699
avgbs_272963.1.55	7D	241757147
avgbs_27368.1.7	7D	166720496
avgbs_27421.1.49	5A	272719879
avgbs_27449.1.46	1C	277853488
avgbs_27461.1.9	6A	404715380
avgbs_2749.1.63	5A	266557439
avgbs_27591.1.36	Unk	NA
avgbs_27694.1.58	7D	25040573
avgbs_27732.1.53	1C	58800910
avgbs_27761.1.63	2D	329400233
avgbs_2784.1.21	6C	549015171
avgbs_27853.1.59	2D	380628226
avgbs_27868.1.47	5A	172807431
avgbs_2791.1.10	6D	264441236
avgbs_279289.1.33	7D	397694791
avgbs_27959.1.26	1A	324255207
avgbs_279620.1.46	2D	335996678
avgbs_280364.1.12	Unk	NA
avgbs_28066.1.28	7C	705219970
avgbs_28067.1.17	6A	416919313
avgbs_28110.1.14	7D	173214913
avgbs_28114.1.34	Unk	NA
avgbs_28216.1.12	5D	456025559
avgbs_28217.1.33	6A	412190013
avgbs_28245.1.7	5A	140738073
avgbs_28255.1.7	5A	251076258
avgbs_28256.1.11	1A	335377149
avgbs_2826.1.31	7D	353299496
avgbs_28286.1.23	7D	370169152
avgbs_28289.1.20	1A	323335691
avgbs_283060.1.51	7C	685180061
avgbs_28312.1.55	7D	233667036
avgbs_28346.1.28	5A	204113330
avgbs_28372.1.19	5A	165710895
avgbs_28378.1.22	7D	425463432
avgbs_28412.1.52	Unk	NA
avgbs_284585.1.25	Unk	NA
avgbs_28482.1.47	1D	385371781
avgbs_2849.1.49	1D	342163070
avgbs_28497.1.39	1C	251702332
avgbs_28593.1.33	2C	548471151
avgbs_28609.1.7	6C	594899655
avgbs_28629.1.30	2C	558556050
avgbs_28630.1.30	Unk	NA
avgbs_287.1.6	Unk	NA
avgbs_287068.1.35	7A	483412445
avgbs_28715.1.32	7D	30243121
avgbs_287461.1.50	1D	380141872
avgbs_28748.1.8	6D	288496472
avgbs_2875.1.12	Unk	NA
avgbs_28753.1.31	5A	447659899
avgbs_28776.1.30	5A	103990483
avgbs_287998.1.43	6A	302677023
avgbs_288035.1.21	Unk	NA
avgbs_28835.1.64	1A	325462834
avgbs_28880.1.38	1C	299358940
avgbs_28893.1.48	2C	555483280
avgbs_28946.1.26	7D	231410323
avgbs_2899.1.13	7D	31175331
avgbs_290002.1.21	7D	150042649
avgbs_29013.1.18	1C	29292793
avgbs_29209.1.25	1C	385271401
avgbs_29270.1.35	6C	553814306
avgbs_29271.1.46	1C	117378876
avgbs_293.1.6	1C	302740473
avgbs_29338.1.21	1C	48776801
avgbs_29340.1.11	1C	109888654
avgbs_29347.1.43	7D	48599488
avgbs_29348.1.24	6C	597090800
avgbs_29405.1.7	6C	573987189
avgbs_29639.1.49	5A	438449242
avgbs_296854.1.6	1A	441154243
avgbs_29775.1.18	6C	572880973
avgbs_2985.1.27	1C	407080726
avgbs_29854.1.14	6C	539059383
avgbs_2990.1.63	6D	275085881
avgbs_29912.1.11	1A	461951257
avgbs_29928.1.7	6C	537318294
avgbs_30019.1.52	7D	211292809
avgbs_30041.1.7	7D	214189493
avgbs_30042.1.7	Unk	NA
avgbs_301008.1.12	5A	285349900
avgbs_30107.1.7	7D	25615940
avgbs_30275.1.15	1D	348500940
avgbs_30303.1.57	7D	148056809
avgbs_3033.1.30	1A	364388746
avgbs_30338.1.58	6C	43822564
avgbs_30409.1.19	6D	280203800
avgbs_30441.1.15	5D	416407037
avgbs_30521.1.32	6C	588838541
avgbs_30541.1.49	3C	540414220
avgbs_305773.1.35	7D	324185337
avgbs_30582.1.40	7D	200217419
avgbs_30619.1.57	7D	355480839
avgbs_3063.1.57	1C	142429942
avgbs_30636.1.61	7D	121710303
avgbs_30637.1.56	7D	311970713
avgbs_30656.1.29	5A	246295128
avgbs_30665.1.54	7D	168684427
avgbs_3069.1.24	Chr00	120014906
avgbs_30691.1.56	7D	70861076
avgbs_30696.1.57	5A	167138028
avgbs_30700.1.30	6C	579140454
avgbs_3071.1.24	6A	313098428
avgbs_30772.1.34	6D	274922092
avgbs_307880.1.62	2C	554694955
avgbs_308054.1.44	6C	599850256
avgbs_30821.1.14	6A	330571578
avgbs_30827.1.52	1C	20636070
avgbs_3089.1.29	1D	405302828
avgbs_3091.1.54	1A	424921486
avgbs_309128.1.35	Unk	NA
avgbs_309143.1.49	1C	396611117
avgbs_30978.1.44	2C	550241783
avgbs_310002.1.44	Unk	NA
avgbs_31025.1.29	2D	35347323
avgbs_31069.1.12	Unk	NA
avgbs_31072.1.38	5A	40747184
avgbs_310896.1.30	1A	323050190
avgbs_311380.1.60	1D	318100993
avgbs_31236.1.54	2C	554571154
avgbs_31262.1.45	7D	315495778
avgbs_31268.1.24	5A	195623434
avgbs_31272.1.49	5A	197479243
avgbs_313274.1.35	Unk	NA
avgbs_31349.1.36	7D	244167834
avgbs_31350.1.57	5A	182081019
avgbs_31353.1.48	7D	221703953
avgbs_31359.1.59	7D	238142440
avgbs_31362.1.44	6A	330331939
avgbs_31389.1.29	7D	410643837
avgbs_31397.1.24	6C	581586648
avgbs_31406.1.59	7D	305907613
avgbs_31428.1.56	6A	415002484
avgbs_31434.1.52	5A	181475218
avgbs_31443.1.43	4D	372736726
avgbs_31461.1.23	5A	36947891
avgbs_315345.1.20	1C	382583896
avgbs_316569.1.63	1C	253573957
avgbs_31699.1.46	6C	602311273
avgbs_31704.1.13	5A	150183384
avgbs_31783.1.9	Unk	NA
avgbs_31854.1.60	Unk	NA
avgbs_31855.1.15	1D	395227280
avgbs_31942.1.12	1D	361758832
avgbs_31951.1.11	1C	117944999
avgbs_31984.1.21	6C	559564347
avgbs_32032.1.37	1A	372799064
avgbs_32101.1.46	7C	706867081
avgbs_321059.1.8	6D	281639583
avgbs_3211.1.63	1D	436135425
avgbs_32164.1.42	1A	322599744
avgbs_32172.1.24	2D	291647456
avgbs_32188.1.24	Unk	NA
avgbs_32225.1.11	5A	233684043
avgbs_32247.1.38	7D	41354993
avgbs_322642.1.53	2D	8836995
avgbs_32318.1.38	6C	581583717
avgbs_32390.1.37	6D	271655526
avgbs_32414.1.43	7A	433484244
avgbs_324229.1.39	1D	297941671
avgbs_32431.1.14	5A	456500997
avgbs_32432.1.14	Unk	NA
avgbs_32447.1.7	2D	253650378
avgbs_32465.1.44	6D	274628318
avgbs_32516.1.63	1D	344629499
avgbs_325237.1.43	1C	300495192
avgbs_32534.1.51	1C	219395427
avgbs_32564.1.25	6C	533348183
avgbs_32651.1.7	1A	409950585
avgbs_3273.1.9	1C	310317219
avgbs_32745.1.20	7A	393962456
avgbs_32775.1.64	7D	325254038
avgbs_32856.1.60	6C	536725522
avgbs_32898.1.33	7A	466812942
avgbs_32916.1.32	5A	228979741
avgbs_329270.1.6	1C	139616776
avgbs_329439.1.20	1C	47564743
avgbs_32993.1.34	1A	426405715
avgbs_330037.1.49	1C	253730876
avgbs_330117.1.33	1C	377910896
avgbs_330119.1.26	1C	375712434
avgbs_330351.1.57	1C	58850152
avgbs_33047.1.26	7D	353922904
avgbs_330617.1.57	1C	46633855
avgbs_330881.1.33	6D	229277761
avgbs_330960.1.63	7D	299145835
avgbs_331034.1.26	1C	413117755
avgbs_331176.1.58	3D	170283560
avgbs_3313.1.44	5D	494125493
avgbs_331691.1.44	1C	73846008
avgbs_332013.1.59	1C	16477656
avgbs_333375.1.19	6D	274658474
avgbs_33354.1.12	1D	355830271
avgbs_3343.1.44	7D	46192597
avgbs_33432.1.16	5A	158879292
avgbs_33447.1.59	1C	88860487
avgbs_334760.1.33	1C	156053502
avgbs_33562.1.17	1C	97884936
avgbs_33639.1.40	5A	125135674
avgbs_337090.1.14	1C	46644568
avgbs_33712.1.36	1A	427341429
avgbs_33744.1.14	7D	281628420
avgbs_337535.1.27	1C	130096987
avgbs_337834.1.56	1C	168067111
avgbs_338407.1.45	1C	194065532
avgbs_33848.1.55	1C	411302884
avgbs_33849.1.25	1D	413663316
avgbs_338806.1.64	1C	206822087
avgbs_338828.1.13	4C	543001859
avgbs_338901.1.61	2C	3589476
avgbs_3390.1.14	1A	438847755
avgbs_339001.1.61	1C	91796575
avgbs_33947.1.54	1C	267281446
avgbs_33950.1.39	7D	245831394
avgbs_33985.1.58	2C	558583148
avgbs_33994.1.7	6C	545590064
avgbs_340175.1.61	2D	81754275
avgbs_34048.1.25	1C	218472230
avgbs_340886.1.12	6C	584019976
avgbs_34137.1.11	1C	375675896
avgbs_3417.1.9	2C	559294842
avgbs_34212.1.47	5A	29645751
avgbs_34251.1.62	6C	540833639
avgbs_342784.1.8	1C	180034159
avgbs_342803.1.26	1C	153905782
avgbs_342815.1.49	1C	372520979
avgbs_343006.1.16	1C	147052739
avgbs_343246.1.7	1C	71525118
avgbs_343297.1.36	1C	21027805
avgbs_343669.1.54	1C	266941270
avgbs_343735.1.18	1C	104615245
avgbs_343798.1.25	1C	67920898
avgbs_343819.1.25	1C	150413377
avgbs_343858.1.17	5A	247900761
avgbs_343965.1.57	1C	280309422
avgbs_34412.1.45	6C	527689747
avgbs_34445.1.30	Unk	NA
avgbs_344456.1.62	1C	6144945
avgbs_3456.1.63	Unk	NA
avgbs_345709.1.62	1C	330954500
avgbs_345938.1.58	3D	181041996
avgbs_34604.1.29	5A	288167297
avgbs_34614.1.35	1A	307662050
avgbs_347146.1.13	1C	377905929
avgbs_34716.1.10	1C	9010054
avgbs_34756.1.26	1D	381899227
avgbs_34758.1.30	1D	358222242
avgbs_34814.1.36	1C	153926515
avgbs_348212.1.38	1C	173104653
avgbs_348249.1.56	1C	308348760
avgbs_348365.1.47	1C	348845154
avgbs_34852.1.16	Unk	NA
avgbs_34862.1.25	1A	344188264
avgbs_348648.1.50	1C	290424011
avgbs_349080.1.35	5A	184146542
avgbs_349178.1.45	1C	194731375
avgbs_34925.1.10	7D	4373046
avgbs_349799.1.11	1C	301062374
avgbs_349889.1.38	7C	394237755
avgbs_35008.1.51	5A	322646665
avgbs_350229.1.47	1C	294007887
avgbs_35049.1.46	7D	315805271
avgbs_350545.1.14	1C	370449191
avgbs_350798.1.16	1A	336570884
avgbs_35108.1.22	Unk	NA
avgbs_35109.1.22	Unk	NA
avgbs_35125.1.29	7A	378792442
avgbs_35126.1.32	7D	163295365
avgbs_351371.1.45	1C	102717255
avgbs_35177.1.21	1C	380496622
avgbs_35194.1.54	1C	274830069
avgbs_351997.1.38	7C	243470239
avgbs_352306.1.27	1A	438808496
avgbs_352409.1.41	7C	413097955
avgbs_352642.1.48	6C	66367741
avgbs_35268.1.36	6D	272380592
avgbs_35306.1.30	2D	8513243
avgbs_353113.1.21	1C	105116280
avgbs_353305.1.33	1C	324599490
avgbs_354080.1.14	1C	313254260
avgbs_35415.1.39	3A	121818073
avgbs_354364.1.58	3C	547211128
avgbs_354897.1.38	1C	121610034
avgbs_354907.1.24	1C	134840179
avgbs_355400.1.25	1C	111093825
avgbs_35556.1.58	7D	27063120
avgbs_355896.1.52	1C	373648743
avgbs_35598.1.19	1C	387008818
avgbs_356027.1.54	1C	160108300
avgbs_356028.1.29	1C	376330667
avgbs_3561.1.35	1C	109055385
avgbs_356599.1.64	Unk	NA
avgbs_356930.1.42	6D	236436144
avgbs_35870.1.58	1C	157779128
avgbs_358817.1.23	1C	307556127
avgbs_358892.1.37	6C	90466417
avgbs_35989.1.46	5A	244394970
avgbs_359942.1.9	1C	12464830
avgbs_360176.1.62	7D	318093037
avgbs_360535.1.48	1C	254792930
avgbs_361084.1.38	1D	356229150
avgbs_361142.1.20	1C	79548221
avgbs_361334.1.54	1A	463434716
avgbs_361448.1.51	7D	76872361
avgbs_361519.1.53	1C	200049049
avgbs_361868.1.17	1C	259920946
avgbs_362061.1.52	1C	109055274
avgbs_362182.1.33	7D	379714490
avgbs_362297.1.41	1A	359112768
avgbs_362493.1.59	7C	276562784
avgbs_362496.1.27	1C	53559882
avgbs_36274.1.13	1C	298065730
avgbs_36315.1.52	5A	301339432
avgbs_36323.1.9	5A	348279649
avgbs_36400.1.29	2C	558078671
avgbs_364133.1.23	1C	113996196
avgbs_365069.1.9	1C	351576806
avgbs_36519.1.13	1D	360674626
avgbs_36555.1.7	Unk	NA
avgbs_365588.1.9	7D	52580544
avgbs_365885.1.18	1C	135583590
avgbs_365889.1.33	1C	40274971
avgbs_36632.1.33	1C	307542940
avgbs_366647.1.30	1C	277537313
avgbs_36683.1.44	1C	220080677
avgbs_36729.1.21	1C	267289781
avgbs_36733.1.32	1C	198499785
avgbs_36748.1.50	6C	585023666
avgbs_368.1.24	1C	20040071
avgbs_368117.1.29	1C	317486769
avgbs_3684.1.6	1C	95829426
avgbs_36880.1.31	1C	302652634
avgbs_36881.1.31	Unk	NA
avgbs_36886.1.49	1C	206908455
avgbs_36887.1.49	Unk	NA
avgbs_369089.1.14	1C	6145016
avgbs_36929.1.26	5A	281961700
avgbs_36979.1.62	6C	130519077
avgbs_369885.1.11	1C	232183341
avgbs_370090.1.53	1C	412640487
avgbs_3704.1.10	5A	194287685
avgbs_370726.1.9	1C	386334895
avgbs_37124.1.61	5A	300656897
avgbs_371306.1.41	1C	241047424
avgbs_37147.1.25	1D	382852941
avgbs_37169.1.37	2D	278990010
avgbs_3718.1.17	7D	193026699
avgbs_372316.1.50	7D	352880218
avgbs_372340.1.31	Unk	NA
avgbs_37249.1.30	1C	386982051
avgbs_372698.1.62	1C	144313498
avgbs_372722.1.57	1C	34988866
avgbs_373008.1.23	1C	114000557
avgbs_37308.1.32	1A	405155360
avgbs_373191.1.54	1A	458596578
avgbs_373417.1.21	Unk	NA
avgbs_373419.1.46	1C	46296775
avgbs_37346.1.23	7D	363336315
avgbs_373734.1.47	1C	387378866
avgbs_373831.1.26	1C	178782593
avgbs_373848.1.11	1C	66438459
avgbs_373858.1.38	1C	171215492
avgbs_373910.1.52	1C	327549220
avgbs_373964.1.26	1C	127906091
avgbs_3740.1.48	5A	428231079
avgbs_374332.1.47	1C	404592185
avgbs_374371.1.47	1C	154643768
avgbs_37448.1.15	7D	411366042
avgbs_37453.1.56	6D	276523574
avgbs_374792.1.22	1C	66982304
avgbs_375809.1.26	2D	8379285
avgbs_37603.1.45	7D	256964366
avgbs_37607.1.37	Unk	NA
avgbs_37617.1.55	1D	378126649
avgbs_37643.1.62	1C	96404681
avgbs_37646.1.11	5A	237864579
avgbs_376467.1.44	1A	312158476
avgbs_376698.1.14	1C	336616463
avgbs_37670.1.41	1C	263283390
avgbs_37693.1.32	7A	459931028
avgbs_37754.1.50	7D	209313711
avgbs_37783.1.16	1C	175777689
avgbs_377840.1.64	1C	350630590
avgbs_377937.1.26	1A	426170260
avgbs_37823.1.51	7D	336223866
avgbs_37836.1.18	5A	266282031
avgbs_37841.1.14	5D	416576047
avgbs_378444.1.52	1C	141740303
avgbs_378575.1.35	1C	213177381
avgbs_37909.1.14	1C	145665160
avgbs_37910.1.14	Unk	NA
avgbs_37935.1.14	7D	184803384
avgbs_37947.1.11	1A	324175522
avgbs_3799.1.8	1A	349353626
avgbs_379957.1.22	Unk	NA
avgbs_38056.1.28	7D	363285894
avgbs_380729.1.29	1C	313773539
avgbs_380757.1.17	6C	578365101
avgbs_38116.1.53	5C	535908696
avgbs_38148.1.41	6A	405686396
avgbs_38180.1.16	1C	170954245
avgbs_381813.1.24	1C	221628775
avgbs_38184.1.21	7D	60147402
avgbs_381899.1.26	1C	282596831
avgbs_38196.1.16	Chr00	173841566
avgbs_38214.1.55	Unk	NA
avgbs_382199.1.60	1C	348846868
avgbs_38233.1.32	7D	263109293
avgbs_38234.1.60	3C	540476664
avgbs_382627.1.51	1C	170230355
avgbs_382954.1.42	2D	335303871
avgbs_382970.1.54	1C	317916520
avgbs_382972.1.38	1C	347306282
avgbs_38450.1.11	1C	117908233
avgbs_385020.1.20	5A	37414460
avgbs_38530.1.12	5A	248362428
avgbs_38551.1.40	7D	304122293
avgbs_385784.1.10	1D	371207666
avgbs_385972.1.49	1A	264289059
avgbs_38695.1.35	2C	540796937
avgbs_387095.1.6	7D	165919880
avgbs_38739.1.33	Unk	NA
avgbs_38759.1.53	5A	164361506
avgbs_38797.1.31	6A	321644644
avgbs_3883.1.8	1C	81730003
avgbs_38861.1.38	7D	66412682
avgbs_38909.1.26	2D	12216685
avgbs_38930.1.58	7D	132325116
avgbs_38937.1.58	7D	72605900
avgbs_38945.1.32	7D	159926194
avgbs_389476.1.17	7D	253311966
avgbs_389493.1.48	5A	288358342
avgbs_38993.1.14	1C	350457426
avgbs_39023.1.9	Unk	NA
avgbs_3906.1.6	5A	300973560
avgbs_39159.1.20	1A	327625221
avgbs_39194.1.33	Unk	NA
avgbs_39215.1.54	5A	231968545
avgbs_39335.1.32	1C	166292200
avgbs_393360.1.34	7D	55741679
avgbs_393512.1.15	2D	525041824
avgbs_39394.1.55	1C	220641780
avgbs_39504.1.55	7A	432332245
avgbs_3951.1.41	6C	81298424
avgbs_396445.1.10	7D	269151941
avgbs_397470.1.44	2D	327425945
avgbs_39799.1.29	7D	364910777
avgbs_398175.1.16	7D	321769336
avgbs_398808.1.9	7D	346760285
avgbs_399132.1.37	7D	262801454
avgbs_399512.1.14	5A	136962114
avgbs_39966.1.29	1C	179867040
avgbs_399856.1.39	7D	231650004
avgbs_40002.1.8	1A	438045821
avgbs_400546.1.39	7D	299507354
avgbs_40081.1.13	1D	389955479
avgbs_40103.1.33	1A	358966792
avgbs_401046.1.53	7D	240654899
avgbs_40111.1.16	1C	105897956
avgbs_40113.1.47	7D	426737324
avgbs_402039.1.10	1D	346743829
avgbs_402392.1.62	5A	176125171
avgbs_40252.1.48	5A	308118309
avgbs_40290.1.11	7D	386786145
avgbs_40328.1.32	2D	12111302
avgbs_40380.1.31	1C	289051287
avgbs_40381.1.40	6C	550309431
avgbs_40385.1.50	1C	121513793
avgbs_40436.1.23	Unk	NA
avgbs_40443.1.38	6D	290445120
avgbs_405303.1.57	7D	373033547
avgbs_40573.1.15	1C	348953528
avgbs_40582.1.51	1C	56179656
avgbs_40604.1.48	1C	290080033
avgbs_40693.1.54	1C	365725038
avgbs_407.1.45	1A	365157101
avgbs_40819.1.59	7D	421495293
avgbs_41084.1.31	2D	86623430
avgbs_4125.1.51	2D	266679130
avgbs_412656.1.25	7D	176023043
avgbs_41327.1.11	4A	110650484
avgbs_414551.1.14	Unk	NA
avgbs_41467.1.35	1C	88860576
avgbs_41480.1.17	1A	362131490
avgbs_41547.1.23	5A	235074778
avgbs_41632.1.59	7A	234845267
avgbs_41635.1.34	1C	112637781
avgbs_41718.1.32	6D	276810936
avgbs_41725.1.24	6A	175023927
avgbs_41758.1.18	5A	239700799
avgbs_41779.1.35	7D	354295603
avgbs_41830.1.21	5A	238184774
avgbs_41852.1.16	5A	247900733
avgbs_419.1.53	6A	413425953
avgbs_41937.1.34	6C	562516427
avgbs_41964.1.29	1C	6766033
avgbs_42198.1.53	5A	164665511
avgbs_42267.1.26	6A	330368348
avgbs_42352.1.49	7D	50734032
avgbs_42379.1.63	5A	312821716
avgbs_424305.1.63	1A	364111287
avgbs_424351.1.59	7A	447480772
avgbs_424842.1.20	6D	290871664
avgbs_424855.1.29	Unk	NA
avgbs_42552.1.42	Unk	NA
avgbs_42557.1.34	5A	311020506
avgbs_42615.1.56	2D	335778273
avgbs_42625.1.18	7D	170326968
avgbs_42741.1.15	Unk	NA
avgbs_42757.1.36	7D	176025993
avgbs_42780.1.32	1C	153641098
avgbs_427956.1.27	1C	322529645
avgbs_427992.1.41	Unk	NA
avgbs_428036.1.12	1C	334275077
avgbs_428040.1.48	1C	353971219
avgbs_428214.1.21	1C	160155284
avgbs_428249.1.30	5A	201713228
avgbs_428602.1.8	5A	275005093
avgbs_42882.1.31	1C	24501268
avgbs_42884.1.31	7D	334488199
avgbs_42905.1.61	5A	163418872
avgbs_42914.1.38	1C	203965081
avgbs_42974.1.17	Unk	NA
avgbs_429767.1.61	1C	286779585
avgbs_429843.1.16	5A	278198437
avgbs_429957.1.62	1A	323050227
avgbs_430011.1.48	7D	65150207
avgbs_43163.1.54	7D	50502249
avgbs_432248.1.46	5A	33131765
avgbs_43296.1.57	5C	536703167
avgbs_43321.1.30	1C	389145669
avgbs_43327.1.63	7D	121933101
avgbs_433275.1.12	5A	286734060
avgbs_4336.1.31	7D	413389769
avgbs_43367.1.46	1A	331733191
avgbs_434242.1.44	6D	276793621
avgbs_43456.1.32	1C	216804634
avgbs_43489.1.32	1C	224418006
avgbs_43513.1.35	1C	200932811
avgbs_43564.1.14	1C	219665567
avgbs_43608.1.47	6C	558961809
avgbs_43609.1.17	5A	58580230
avgbs_43631.1.14	5D	161554419
avgbs_43761.1.39	5D	226658153
avgbs_43780.1.47	1C	31573838
avgbs_4381.1.11	7A	394615122
avgbs_43857.1.42	7D	119563887
avgbs_439513.1.24	1C	409239619
avgbs_439578.1.63	5A	177747091
avgbs_43983.1.52	7D	222599090
avgbs_44019.1.32	1C	72827031
avgbs_4408.1.34	6C	555937162
avgbs_441837.1.52	6D	209716215
avgbs_44207.1.61	5A	163131787
avgbs_44217.1.27	5A	126523373
avgbs_44270.1.8	7D	215524315
avgbs_44279.1.27	7A	212757571
avgbs_44280.1.50	7D	169397945
avgbs_44286.1.40	2D	9977905
avgbs_44328.1.23	2D	335395064
avgbs_44447.1.15	7D	187235395
avgbs_44463.1.22	5A	310691087
avgbs_44537.1.21	7D	253506681
avgbs_44586.1.52	7D	472573458
avgbs_44638.1.36	1C	100989262
avgbs_44640.1.32	1C	149867752
avgbs_44660.1.40	5A	112303289
avgbs_44672.1.19	1C	385143547
avgbs_44678.1.39	7D	56647704
avgbs_44733.1.34	6A	317358522
avgbs_44781.1.6	1C	228232703
avgbs_44889.1.60	1C	252952998
avgbs_44901.1.51	7D	50727362
avgbs_44931.1.50	2D	189806261
avgbs_44961.1.12	6D	253744244
avgbs_449662.1.24	7D	136978020
avgbs_450424.1.6	1C	376300290
avgbs_450607.1.8	6C	529053802
avgbs_45086.1.43	Chr00	114620136
avgbs_451153.1.24	1C	274794860
avgbs_45170.1.32	1A	409484488
avgbs_45206.1.22	1C	229308246
avgbs_452071.1.26	1A	451575768
avgbs_45213.1.9	5A	189498850
avgbs_453601.1.28	1C	108253866
avgbs_453703.1.11	1C	300752264
avgbs_45395.1.47	1C	289002345
avgbs_45419.1.29	1C	397254799
avgbs_454497.1.57	1C	16941820
avgbs_455215.1.59	1C	270121709
avgbs_45576.1.38	Unk	NA
avgbs_45588.1.45	5A	439293577
avgbs_45589.1.48	6D	254667983
avgbs_4559.1.63	7D	59260891
avgbs_456259.1.25	1C	201990604
avgbs_45628.1.49	1C	154880013
avgbs_45651.1.10	Unk	NA
avgbs_456610.1.41	1C	398945630
avgbs_45663.1.21	Unk	NA
avgbs_45686.1.35	1C	122282105
avgbs_45736.1.36	Unk	NA
avgbs_457417.1.6	1A	323431778
avgbs_45747.1.15	5A	234662389
avgbs_45763.1.11	7D	319652401
avgbs_45775.1.20	2D	193001798
avgbs_457897.1.44	1A	453226911
avgbs_458102.1.27	6C	539850277
avgbs_458599.1.18	7A	387624901
avgbs_458844.1.22	1C	125756791
avgbs_45904.1.53	2D	36607876
avgbs_45939.1.9	7D	371799449
avgbs_459509.1.37	1A	437909884
avgbs_460.1.44	1A	439218416
avgbs_46008.1.54	6C	50432222
avgbs_46068.1.55	7D	320250794
avgbs_46134.1.55	7D	119080179
avgbs_461843.1.30	1A	357253934
avgbs_462127.1.28	1C	232586032
avgbs_46250.1.32	5A	248799430
avgbs_46253.1.48	5A	129016118
avgbs_46276.1.39	1C	121748471
avgbs_463344.1.45	1C	231041355
avgbs_463352.1.13	1C	283173515
avgbs_46373.1.52	5A	132273858
avgbs_46375.1.35	7D	172155725
avgbs_464141.1.41	1C	287877904
avgbs_46476.1.45	7D	65895514
avgbs_46541.1.13	1D	357030852
avgbs_465889.1.30	1A	358478907
avgbs_46617.1.38	7D	323568734
avgbs_46636.1.60	1C	108228248
avgbs_46675.1.37	7D	304482723
avgbs_466776.1.50	7A	114316077
avgbs_46683.1.28	6D	292233406
avgbs_467.1.64	5A	259258428
avgbs_467181.1.12	7D	301138836
avgbs_46721.1.31	5A	259616804
avgbs_46725.1.38	7A	155223314
avgbs_467514.1.21	1C	161851349
avgbs_467525.1.14	1C	319118981
avgbs_467772.1.38	1C	364660536
avgbs_468397.1.14	1C	194684659
avgbs_46872.1.29	5A	287575048
avgbs_4688.1.59	5A	226682352
avgbs_4691.1.15	6D	277680924
avgbs_469103.1.19	7D	198969930
avgbs_469249.1.60	7D	407265753
avgbs_469435.1.48	7D	196277744
avgbs_46950.1.50	6A	405816410
avgbs_469588.1.21	1C	345628500
avgbs_469595.1.40	Unk	NA
avgbs_47000.1.56	1C	156283782
avgbs_47008.1.16	7D	327714357
avgbs_470092.1.11	1C	260139661
avgbs_470703.1.28	7D	59921699
avgbs_471088.1.37	7D	23402871
avgbs_471106.1.57	6D	274895900
avgbs_47111.1.10	Unk	NA
avgbs_471619.1.26	1C	394429680
avgbs_47170.1.15	Unk	NA
avgbs_47172.1.59	6D	273343080
avgbs_471814.1.37	1C	206673676
avgbs_471873.1.22	5A	295261892
avgbs_471905.1.13	1C	378174722
avgbs_472050.1.9	4C	186537279
avgbs_47217.1.9	1D	361313363
avgbs_472404.1.43	7D	356800253
avgbs_47252.1.27	Unk	NA
avgbs_472789.1.10	1C	296171432
avgbs_47325.1.21	5D	493159908
avgbs_47360.1.59	2C	557961747
avgbs_4740.1.47	6C	572976007
avgbs_4743.1.52	1D	371283187
avgbs_47444.1.53	1C	114010524
avgbs_474855.1.62	1A	310525337
avgbs_474973.1.54	7D	224245087
avgbs_475211.1.25	1D	374819202
avgbs_47534.1.29	7D	264732752
avgbs_47540.1.19	7D	15387570
avgbs_47547.1.19	Unk	NA
avgbs_47670.1.23	7D	59031058
avgbs_47705.1.26	Unk	NA
avgbs_477437.1.25	7D	219045420
avgbs_47770.1.28	Unk	NA
avgbs_4784.1.15	1C	366372859
avgbs_478417.1.44	5A	201637735
avgbs_47842.1.55	1C	62849160
avgbs_478456.1.18	7A	179942657
avgbs_4785.1.25	6C	110580858
avgbs_47866.1.38	5A	135862683
avgbs_478697.1.31	1C	363802286
avgbs_478698.1.20	Unk	NA
avgbs_478783.1.63	1C	58252852
avgbs_478787.1.31	1C	391200865
avgbs_47879.1.64	5A	172493002
avgbs_479532.1.9	7D	499845829
avgbs_47981.1.6	7D	150988170
avgbs_47992.1.59	1C	403834215
avgbs_479987.1.26	1D	388390205
avgbs_48038.1.28	5A	168092261
avgbs_480766.1.7	1C	318562970
avgbs_48086.1.48	1C	152712791
avgbs_48102.1.36	7A	429052171
avgbs_48153.1.19	1A	342238457
avgbs_48183.1.30	6C	559636371
avgbs_482697.1.11	1C	141197418
avgbs_48279.1.48	6D	284198492
avgbs_48373.1.7	5A	228050286
avgbs_48429.1.46	7D	84210397
avgbs_48450.1.63	7D	273704960
avgbs_484845.1.61	1C	99981695
avgbs_485157.1.59	1C	294022467
avgbs_48529.1.7	1C	141678030
avgbs_485459.1.18	5D	496297021
avgbs_485806.1.27	5A	286734094
avgbs_485939.1.40	7D	339805405
avgbs_486060.1.32	1C	172543825
avgbs_48816.1.39	5D	494181644
avgbs_48826.1.28	5A	303036372
avgbs_488483.1.59	1C	125235269
avgbs_488847.1.9	1C	402157115
avgbs_489392.1.21	1C	388977590
avgbs_490288.1.49	6D	271569948
avgbs_49030.1.11	6D	263506949
avgbs_490470.1.8	5A	205006332
avgbs_490480.1.18	6C	555998979
avgbs_49079.1.19	6D	261545753
avgbs_49082.1.20	7D	172148652
avgbs_490914.1.22	1C	140692341
avgbs_491062.1.8	5A	139834481
avgbs_49158.1.17	1C	58436845
avgbs_491658.1.8	7D	97503475
avgbs_49171.1.27	1D	414847640
avgbs_4919.1.9	7D	13481249
avgbs_492175.1.55	1C	412382054
avgbs_492810.1.36	7D	202178876
avgbs_492885.1.41	Unk	NA
avgbs_49339.1.45	7D	152475276
[truncated: 6,907 more rows]

## Sheet: MarksForLipidKernel
Markers used to construct the biologically-informed kernel for lipid-enriched factors. These are markers that are in LD with markers associated with lipid-enriched factors.
Marker	Chromosome	Base Pairs
avgbs_100666.1.18	1A	326609845
avgbs_101057.1.56	1A	343995391
avgbs_101311.1.61	1A	323789269
avgbs_101357.1.28	1A	345979023
avgbs_101458.1.22	2C	514923117
avgbs_10262.1.20	1A	321723548
avgbs_104818.1.16	1A	343961287
avgbs_10485.1.55	1A	326426872
avgbs_10569.1.14	6A	409955674
avgbs_10582.1.41	1A	361302662
avgbs_107680.1.8	1A	264287612
avgbs_107990.1.34	1A	328810232
avgbs_108120.1.54	6A	403029420
avgbs_108936.1.10	1A	321973928
avgbs_109366.1.60	1A	326107791
avgbs_109872.1.31	1A	312548622
avgbs_110549.1.63	1A	321419798
avgbs_111286.1.36	1A	326602943
avgbs_112898.1.18	1A	335121794
avgbs_115244.1.38	1A	328156655
avgbs_115272.1.42	1A	330208285
avgbs_116334.1.46	7A	427829727
avgbs_117865.1.36	6A	402602568
avgbs_118009.1.54	6A	409638350
avgbs_118634.1.12	1A	342323882
avgbs_122367.1.28	NA	NA
avgbs_122437.1.44	1A	351821092
avgbs_124115.1.16	1A	364234751
avgbs_126101.1.38	NA	NA
avgbs_13640.1.10	1A	328889454
avgbs_15380.1.64	6A	409912499
avgbs_15494.1.63	1A	364015934
avgbs_1673.1.11	3D	369570422
avgbs_18341.1.13	NA	NA
avgbs_20064.1.55	1A	307820948
avgbs_201116.1.9	6A	412650893
avgbs_203980.1.58	1A	305444893
avgbs_207640.1.33	NA	NA
avgbs_20952.1.53	1A	347217385
avgbs_216923.1.33	1A	360798571
avgbs_218503.1.56	1A	331963312
avgbs_22392.1.64	6A	409312103
avgbs_22438.1.17	1D	341912528
avgbs_224639.1.45	1A	352202288
avgbs_23128.1.25	1A	324104016
avgbs_239667.1.20	7A	432234861
avgbs_23992.1.58	7A	439813854
avgbs_24461.1.6	7A	432044495
avgbs_245659.1.26	1A	349139566
avgbs_246584.1.41	1A	372442831
avgbs_247709.1.31	1A	354597303
avgbs_25128.1.40	1A	345637233
avgbs_25356.1.33	1A	314287324
avgbs_25897.1.9	6A	423020476
avgbs_27196.1.13	1A	372130699
avgbs_27461.1.9	6A	404715380
avgbs_27959.1.26	1A	324255207
avgbs_28217.1.33	6A	412190013
avgbs_28256.1.11	1A	335377149
avgbs_28289.1.20	1A	323335691
avgbs_283060.1.51	7C	685180061
avgbs_2849.1.49	1D	342163070
avgbs_28835.1.64	1A	325462834
avgbs_3033.1.30	1A	364388746
avgbs_310002.1.44	NA	NA
avgbs_310896.1.30	1A	323050190
avgbs_31428.1.56	6A	415002484
avgbs_32032.1.37	1A	372799064
avgbs_32164.1.42	1A	322599744
avgbs_32414.1.43	7A	433484244
avgbs_34445.1.30	NA	NA
avgbs_34614.1.35	1A	307662050
avgbs_34862.1.25	1A	344188264
avgbs_350798.1.16	1A	336570884
avgbs_362297.1.41	1A	359112768
avgbs_376467.1.44	1A	312158476
avgbs_37947.1.11	1A	324175522
avgbs_3799.1.8	1A	349353626
avgbs_38148.1.41	6A	405686396
avgbs_385972.1.49	1A	264289059
avgbs_39159.1.20	1A	327625221
avgbs_39504.1.55	7A	432332245
avgbs_40103.1.33	1A	358966792
avgbs_407.1.45	1A	365157101
avgbs_414551.1.14	NA	NA
avgbs_41480.1.17	1A	362131490
avgbs_419.1.53	6A	413425953
avgbs_424305.1.63	1A	364111287
avgbs_424855.1.29	NA	NA
avgbs_429957.1.62	1A	323050227
avgbs_43367.1.46	1A	331733191
avgbs_457417.1.6	1A	323431778
avgbs_461843.1.30	1A	357253934
avgbs_465889.1.30	1A	358478907
avgbs_46950.1.50	6A	405816410
avgbs_474855.1.62	1A	310525337
avgbs_48102.1.36	7A	429052171
avgbs_48153.1.19	1A	342238457
avgbs_49689.1.53	1A	320817143
avgbs_499931.1.21	1A	349890403
avgbs_524364.1.46	1A	325052959
avgbs_53044.1.60	1A	308061876
avgbs_5310.1.18	NA	NA
avgbs_53706.1.20	1A	324452441
avgbs_5384.1.15	1A	273556123
avgbs_58302.1.6	NA	NA
avgbs_58340.1.18	1A	321293252
avgbs_59017.1.23	1A	369606718
avgbs_60089.1.24	1A	350849633
avgbs_60192.1.44	6A	403299510
avgbs_6404.1.46	1A	348303155
avgbs_647984.1.48	7A	436058600
avgbs_66463.1.55	1A	365210734
avgbs_66627.1.36	1A	354302628
avgbs_68085.1.30	1A	358604520
avgbs_70290.1.47	1A	308477015
avgbs_70674.1.22	1D	342247626
avgbs_70707.1.11	1A	323977381
avgbs_70862.1.36	6A	414799167
avgbs_71831.1.22	1A	344236826
avgbs_74376.1.26	1A	310729283
avgbs_76353.1.18	1A	347411424
avgbs_78512.1.26	1A	329990761
avgbs_78577.1.25	1A	307881001
avgbs_78578.1.25	NA	NA
avgbs_79689.1.50	1A	325749978
avgbs_8063.1.49	7A	432098797
avgbs_8125.1.44	1A	332149200
avgbs_81975.1.51	2C	516368593
avgbs_83597.1.18	6A	401965906
avgbs_84667.1.42	2C	515212081
avgbs_84738.1.64	1A	354322084
avgbs_86754.1.56	1A	353273208
avgbs_87393.1.25	1A	355180790
avgbs_87518.1.56	6A	402715574
avgbs_87803.1.19	2C	515231969
avgbs_88074.1.9	1A	360683265
avgbs_88075.1.9	NA	NA
avgbs_8880.1.16	1A	323661209
avgbs_890.1.63	6A	418384234
avgbs_89117.1.55	1A	325062105
avgbs_8971.1.40	6A	403992393
avgbs_8987.1.29	7A	427829797
avgbs_90679.1.16	1A	312548580
avgbs_90713.1.38	1A	360552772
avgbs_90899.1.42	1A	372118000
avgbs_92503.1.44	1A	347481741
avgbs_94282.1.39	1A	353111702
avgbs_97451.1.11	6A	415886824
avgbs_98045.1.53	1A	323228008
avgbs_98763.1.40	1A	340859843
avgbs_99270.1.58	1A	332876078
avgbs_99974.1.32	NA	NA
avgbs_cluster_10038.1.25	NA	NA
avgbs_cluster_10388.1.18	1A	332781794
avgbs_cluster_10696.1.6	NA	NA
avgbs_cluster_10857.1.22	1A	339790666
avgbs_cluster_11400.1.20	NA	NA
avgbs_cluster_11438.1.52	1A	329559280
avgbs_cluster_11676.1.9	NA	NA
avgbs_cluster_11840.1.23	NA	NA
avgbs_cluster_12706.1.62	1A	347843041
avgbs_cluster_1310.1.38	NA	NA
avgbs_cluster_13348.1.19	1A	311452464
avgbs_cluster_13425.1.61	1A	297482533
avgbs_cluster_13847.1.57	1A	346974274
avgbs_cluster_13998.1.34	NA	NA
avgbs_cluster_14154.1.44	1A	315097689
avgbs_cluster_14495.1.12	NA	NA
avgbs_cluster_14495.1.52	NA	NA
avgbs_cluster_15150.1.40	NA	NA
avgbs_cluster_15802.1.60	NA	NA
avgbs_cluster_16049.1.26	NA	NA
avgbs_cluster_16363.1.21	NA	NA
avgbs_cluster_16649.1.40	6A	413517051
avgbs_cluster_17169.1.14	NA	NA
avgbs_cluster_17430.1.21	NA	NA
avgbs_cluster_1761.1.35	NA	NA
avgbs_cluster_17929.1.18	NA	NA
avgbs_cluster_17943.1.46	1A	344964566
avgbs_cluster_17953.1.15	1A	369655660
avgbs_cluster_18513.1.8	NA	NA
avgbs_cluster_1865.1.34	1A	353086453
avgbs_cluster_1903.1.22	NA	NA
avgbs_cluster_19063.1.6	NA	NA
avgbs_cluster_19206.1.6	6A	408736355
avgbs_cluster_19606.1.6	1A	314342814
avgbs_cluster_20104.1.13	1A	330049691
avgbs_cluster_20264.1.16	NA	NA
avgbs_cluster_20342.1.58	1A	349765713
avgbs_cluster_20691.1.39	1A	362591798
avgbs_cluster_21441.1.13	NA	NA
avgbs_cluster_21875.1.6	1A	371169622
avgbs_cluster_22033.1.53	1A	358243312
avgbs_cluster_22463.1.18	NA	NA
avgbs_cluster_22723.1.42	1A	365161413
avgbs_cluster_23198.1.41	1A	360129757
avgbs_cluster_23271.1.33	6A	411672266
avgbs_cluster_23557.1.20	NA	NA
avgbs_cluster_23568.1.40	NA	NA
avgbs_cluster_23573.1.10	NA	NA
avgbs_cluster_23930.1.47	6A	415116426
avgbs_cluster_24302.1.16	NA	NA
avgbs_cluster_25225.1.21	NA	NA
avgbs_cluster_25365.1.22	7A	429594682
avgbs_cluster_25370.1.17	7A	438560141
avgbs_cluster_25370.1.52	7A	438560176
avgbs_cluster_2576.1.34	NA	NA
avgbs_cluster_25783.1.16	1A	335529246
avgbs_cluster_25855.1.30	1A	335555440
avgbs_cluster_25855.1.38	1A	335555448
avgbs_cluster_26241.1.24	6A	409484253
avgbs_cluster_26879.1.25	1A	349895509
avgbs_cluster_26911.1.29	1A	364420197
avgbs_cluster_27006.1.21	7C	689877624
avgbs_cluster_2716.1.11	NA	NA
avgbs_cluster_2716.1.46	NA	NA
avgbs_cluster_27364.1.25	NA	NA
avgbs_cluster_2770.1.51	1A	333088132
avgbs_cluster_27711.1.49	NA	NA
avgbs_cluster_27787.1.18	6A	411919705
avgbs_cluster_27799.1.54	1A	321424829
avgbs_cluster_27932.1.23	NA	NA
avgbs_cluster_28375.1.13	7A	429556779
avgbs_cluster_28582.1.25	NA	NA
avgbs_cluster_29502.1.54	1A	362696850
avgbs_cluster_29921.1.12	NA	NA
avgbs_cluster_30221.1.10	1A	333452645
avgbs_cluster_30291.1.35	6A	402924759
avgbs_cluster_3048.1.44	1A	334522841
avgbs_cluster_30569.1.44	1A	370384427
avgbs_cluster_31236.1.44	1A	323018622
avgbs_cluster_31612.1.12	1A	339477364
avgbs_cluster_31908.1.57	6A	412272312
avgbs_cluster_31941.1.56	1A	362298534
avgbs_cluster_32004.1.13	NA	NA
avgbs_cluster_32903.1.35	1A	315293744
avgbs_cluster_33069.1.45	1A	309891940
avgbs_cluster_33385.1.19	6A	409201170
avgbs_cluster_33472.1.31	1A	328885280
avgbs_cluster_3360.1.11	NA	NA
avgbs_cluster_34279.1.34	1A	332863180
avgbs_cluster_34514.1.18	NA	NA
avgbs_cluster_34889.1.32	NA	NA
avgbs_cluster_34931.1.17	1A	323806028
avgbs_cluster_35105.1.45	NA	NA
avgbs_cluster_35206.1.20	1A	364184723
avgbs_cluster_355.1.16	NA	NA
avgbs_cluster_35870.1.20	1A	347030582
avgbs_cluster_35870.1.58	1A	347030620
avgbs_cluster_36118.1.26	1A	350420336
avgbs_cluster_36340.1.11	1A	347101482
avgbs_cluster_36399.1.52	1A	324101580
avgbs_cluster_36806.1.53	6A	415917060
avgbs_cluster_37033.1.30	1A	357572723
avgbs_cluster_37041.1.34	1A	362322733
avgbs_cluster_3714.1.57	6A	403198638
avgbs_cluster_37214.1.24	1A	326555493
avgbs_cluster_3728.1.21	7A	432338485
avgbs_cluster_37459.1.42	NA	NA
avgbs_cluster_37788.1.13	1A	311856998
avgbs_cluster_37788.1.45	1A	311856966
avgbs_cluster_38052.1.63	NA	NA
avgbs_cluster_38268.1.57	NA	NA
avgbs_cluster_38284.1.30	1A	323651160
avgbs_cluster_3844.1.14	1A	321293279
avgbs_cluster_38747.1.44	1A	307668388
avgbs_cluster_38795.1.15	NA	NA
avgbs_cluster_38868.1.12	1D	356672333
avgbs_cluster_38940.1.22	NA	NA
avgbs_cluster_39132.1.31	1A	347026801
avgbs_cluster_39392.1.21	6A	405886715
avgbs_cluster_3946.1.10	NA	NA
avgbs_cluster_39518.1.13	1A	340553402
avgbs_cluster_39888.1.38	NA	NA
avgbs_cluster_39969.1.53	6A	415100968
avgbs_cluster_40005.1.19	6A	415982824
avgbs_cluster_40351.1.24	NA	NA
avgbs_cluster_40351.1.27	NA	NA
avgbs_cluster_40498.1.10	1A	338077976
avgbs_cluster_40822.1.13	NA	NA
avgbs_cluster_41180.1.45	1D	342481780
avgbs_cluster_42393.1.38	NA	NA
avgbs_cluster_42543.1.23	6A	420920223
avgbs_cluster_42976.1.41	1A	357067556
avgbs_cluster_43160.1.36	6A	414799167
avgbs_cluster_43228.1.31	1A	336187709
avgbs_cluster_43472.1.35	1D	331910280
avgbs_cluster_4429.1.10	7A	439503807
avgbs_cluster_444.1.51	1A	371210829
avgbs_cluster_44741.1.13	NA	NA
avgbs_cluster_4557.1.25	1A	371159069
avgbs_cluster_4561.1.21	NA	NA
avgbs_cluster_46079.1.14	NA	NA
avgbs_cluster_47564.1.47	1A	327838992
avgbs_cluster_49757.1.27	NA	NA
avgbs_cluster_50875.1.17	NA	NA
avgbs_cluster_53198.1.61	1A	323071517
avgbs_cluster_53856.1.46	NA	NA
avgbs_cluster_54086.1.59	1A	321641166
avgbs_cluster_5422.1.23	1A	361188683
avgbs_cluster_5481.1.32	NA	NA
avgbs_cluster_550.1.52	NA	NA
avgbs_cluster_5897.1.28	NA	NA
avgbs_cluster_62.1.60	6A	409953989
avgbs_cluster_6283.1.37	1A	336581394
avgbs_cluster_6382.1.20	NA	NA
avgbs_cluster_6435.1.21	1A	336572051
avgbs_cluster_6482.1.11	NA	NA
avgbs_cluster_6633.1.34	1A	308059782
avgbs_cluster_69048.1.17	NA	NA
avgbs_cluster_69772.1.41	1A	357399323
avgbs_cluster_7488.1.23	6A	411746892
avgbs_cluster_8107.1.27	1A	314285458
avgbs_cluster_8455.1.30	7A	437980941
avgbs_cluster_9212.1.49	7A	438562152
avgbs_cluster_9764.1.54	1A	343209988
avgbs2_103005.1.24	1A	370404054
avgbs2_103005.1.52	1A	370404082
avgbs2_103006.1.24	NA	NA
avgbs2_108529.1.17	1A	371907864
avgbs2_108953.1.26	6A	421364290
avgbs2_109044.1.33	NA	NA
avgbs2_109581.1.12	NA	NA
avgbs2_110271.1.14	NA	NA
avgbs2_112750.1.30	6A	419812285
avgbs2_114274.2.42	1A	352539598
avgbs2_114484.1.20	1D	316598419
avgbs2_116151.1.25	NA	NA
avgbs2_118750.1.22	7A	429594682
avgbs2_121113.1.40	NA	NA
avgbs2_124411.1.35	NA	NA
avgbs2_131560.1.32	NA	NA
avgbs2_135653.1.33	6A	411672554
avgbs2_135750.1.27	NA	NA
avgbs2_136099.1.47	7C	686387915
avgbs2_140164.1.10	NA	NA
avgbs2_14356.1.23	NA	NA
avgbs2_145202.2.21	NA	NA
avgbs2_145202.2.38	NA	NA
avgbs2_145480.1.18	NA	NA
avgbs2_145480.1.21	NA	NA
avgbs2_146606.1.32	NA	NA
avgbs2_150519.1.18	NA	NA
avgbs2_153185.1.36	6A	411391261
avgbs2_154305.1.43	6A	413728469
avgbs2_155065.1.58	1A	352140866
avgbs2_155836.1.33	1A	361221599
avgbs2_158635.1.16	1A	313748895
avgbs2_160788.1.24	NA	NA
avgbs2_160788.1.39	NA	NA
avgbs2_161818.1.26	NA	NA
avgbs2_163173.1.35	NA	NA
avgbs2_166955.1.33	1A	325435230
avgbs2_168500.1.44	NA	NA
avgbs2_169971.1.30	1A	340284693
avgbs2_175708.1.20	1A	360732740
avgbs2_177987.1.24	1D	464627437
avgbs2_17847.1.28	1A	334716253
avgbs2_185553.1.61	1A	311754890
avgbs2_189433.1.18	6A	406354712
avgbs2_189433.1.42	6A	406354736
avgbs2_191288.1.22	NA	NA
avgbs2_192118.1.39	1A	333088455
avgbs2_195766.1.20	NA	NA
avgbs2_197908.1.16	1A	364234751
avgbs2_200696.1.17	NA	NA
avgbs2_24305.1.63	6A	409916745
avgbs2_25846.1.16	NA	NA
avgbs2_2591.1.25	1A	347560934
avgbs2_31250.1.23	1A	361188683
avgbs2_3142.1.34	1A	359633187
avgbs2_3142.1.57	1A	359633210
avgbs2_32300.3.11	6A	403186238
avgbs2_35724.1.20	1D	346269581
avgbs2_3759.1.26	1D	321615802
avgbs2_38975.1.50	NA	NA
avgbs2_38975.1.53	NA	NA
avgbs2_40011.2.62	1A	332408448
avgbs2_41285.1.14	NA	NA
avgbs2_41857.1.17	NA	NA
avgbs2_42597.1.55	NA	NA
avgbs2_44045.1.19	NA	NA
avgbs2_47340.1.26	6A	426347050
avgbs2_47666.1.10	NA	NA
avgbs2_48974.1.21	NA	NA
avgbs2_51234.1.45	NA	NA
avgbs2_51234.1.51	NA	NA
avgbs2_55462.2.43	NA	NA
avgbs2_5635.1.20	1A	515038042
avgbs2_57822.1.27	NA	NA
avgbs2_59385.1.26	1A	330774765
avgbs2_6019.1.10	1A	326685052
avgbs2_61517.2.30	NA	NA
avgbs2_62561.1.17	NA	NA
avgbs2_62561.1.26	NA	NA
avgbs2_64295.1.42	7A	421125125
avgbs2_64659.1.12	NA	NA
avgbs2_64764.1.27	NA	NA
avgbs2_67899.1.40	NA	NA
avgbs2_68215.1.47	1A	372655875
avgbs2_70018.1.24	6A	411577602
avgbs2_7185.1.23	NA	NA
avgbs2_7201.1.38	1D	298630931
avgbs2_74430.1.38	NA	NA
avgbs2_75392.1.38	1A	333950941
avgbs2_75467.2.30	1A	329580340
avgbs2_7695.1.10	NA	NA
avgbs2_80976.2.45	1D	320860712
avgbs2_83749.1.18	NA	NA
avgbs2_8497.1.16	NA	NA
avgbs2_89972.1.18	NA	NA
avgbs2_90581.1.23	NA	NA
avgbs2_90721.2.30	NA	NA
avgbs2_91898.1.22	NA	NA
avgbs2_94881.1.27	NA	NA
avgbs2_98021.2.33	NA	NA

## Sheet: MarkerMap
Information for markers used for genome-wide association mapping.
Marker	Linkage Group	Chromosome	Base pair
avgbs_100044.1.20	Mrg17	6C	571227744
avgbs_100078.1.20	Mrg20	4A	456815797
avgbs_100079.1.51	Mrg20	4A	301179074
avgbs_100098.1.35	Mrg12	NA	NA
avgbs_100099.1.34	Mrg17	NA	NA
avgbs_100100.1.64	Mrg06	5D	37396299
avgbs_100138.1.18	Mrg08	2D	482640410
avgbs_100143.1.15	Mrg28	1C	18817456
avgbs_100179.1.26	Mrg28	1C	98364629
avgbs_100305.1.38	Mrg12	7A	371651187
avgbs_100334.1.14	Mrg18	1A	464631469
avgbs_100354.1.57	Mrg01	1D	462566928
avgbs_100361.1.11	Mrg01	1A	21432938
avgbs_100381.1.10	Mrg20	NA	NA
avgbs_100385.1.23	Mrg02	NA	NA
avgbs_100406.1.29	Mrg28	1C	211510554
avgbs_100498.1.44	Mrg15	3C	79837966
avgbs_100503.1.22	Mrg28	NA	NA
avgbs_100518.1.10	Mrg15	3C	459814062
avgbs_10053.1.6	Mrg06	5D	468831188
avgbs_100543.1.9	Mrg08	2D	78801376
avgbs_100544.1.29	Mrg21	4D	136587608
avgbs_100573.1.40	Mrg06	5D	495431976
avgbs_100575.1.41	Mrg21	NA	NA
avgbs_100591.1.31	Mrg08	NA	NA
avgbs_100596.1.13	Mrg17	6C	523380999
avgbs_100603.1.24	Mrg20	4A	433327834
avgbs_100609.1.24	Mrg11	7C	441715506
avgbs_100622.1.9	Mrg04	6D	256183085
avgbs_100653.1.9	Mrg11	7C	651723981
avgbs_100660.1.50	Mrg21	4D	419814388
avgbs_100692.1.39	Mrg21	2A	423310764
avgbs_100771.1.33	Mrg12	7A	127675552
avgbs_100801.1.38	Mrg11	7C	328604398
avgbs_100830.1.37	Mrg17	6C	435793362
avgbs_100868.1.10	Mrg21	NA	NA
avgbs_100875.1.33	Mrg24	5D	304090441
avgbs_100880.1.14	Mrg15	NA	NA
avgbs_100893.1.18	Mrg01	1D	39013424
avgbs_100897.1.41	Mrg17	6C	326868163
avgbs_100901.1.44	Mrg28	1C	40236397
avgbs_100909.1.17	Mrg13	2C	550011160
avgbs_100912.1.48	Mrg24	5D	493781922
avgbs_100915.1.60	Mrg24	5A	380591656
avgbs_10092.1.57	Mrg20	4A	411530819
avgbs_100920.1.60	Mrg19	3D	413442286
avgbs_100922.1.13	Mrg17	6C	451579922
avgbs_100938.1.63	Mrg13	2C	9183450
avgbs_100940.1.41	Mrg20	NA	NA
avgbs_100952.1.12	Mrg06	5D	403973911
avgbs_100961.1.17	Mrg17	6C	484385424
avgbs_100974.1.45	Mrg03	5C	500100088
avgbs_100975.1.51	Mrg11	7C	159849227
avgbs_100987.1.9	Mrg04	6D	283888028
avgbs_10099.1.28	Mrg33	2A	396007765
avgbs_101057.1.56	Mrg01	1A	343995391
avgbs_10108.1.42	Mrg15	3C	552045399
avgbs_101094.1.54	Mrg15	3C	538547440
avgbs_101101.1.9	Mrg02	7D	35044737
avgbs_101121.1.53	Mrg08	2D	355018348
avgbs_101134.1.33	Mrg02	7D	502737047
avgbs_101153.1.33	Mrg03	5C	603923781
avgbs_101201.1.31	Mrg04	6D	274424592
avgbs_10121.1.24	Mrg19	3D	453642442
avgbs_101254.1.9	Mrg11	7C	418557211
avgbs_101255.1.36	Mrg06	5D	5697113
avgbs_101266.1.44	Mrg01	NA	NA
avgbs_101325.1.24	Mrg15	NA	NA
avgbs_101340.1.33	Mrg20	4A	373234409
avgbs_101364.1.10	Mrg08	NA	NA
avgbs_101383.1.46	Mrg08	2D	339141914
avgbs_101443.1.41	Mrg01	1D	275125441
avgbs_101450.1.16	Mrg12	7A	178120176
avgbs_10146.1.6	Mrg17	NA	NA
avgbs_101483.1.35	Mrg33	NA	NA
avgbs_10149.1.48	Mrg17	NA	NA
avgbs_1015.1.63	Mrg17	6C	79904386
avgbs_101573.1.48	Mrg28	1C	25976236
avgbs_101583.1.41	Mrg17	6C	565087317
avgbs_101603.1.28	Mrg01	1D	7803992
avgbs_101665.1.38	Mrg18	1A	524230980
avgbs_101695.1.10	Mrg02	7D	476643884
avgbs_101705.1.42	Mrg08	2D	458606575
avgbs_101709.1.25	Mrg09	4C	280586463
avgbs_101742.1.28	Mrg23	3A	119277392
avgbs_10179.1.63	Mrg09	4C	2769740
avgbs_101791.1.51	Mrg15	3C	50675505
avgbs_1018.1.47	Mrg18	1A	480101585
avgbs_101809.1.8	Mrg21	4D	245082546
avgbs_101819.1.44	Mrg19	3D	31922864
avgbs_101867.1.47	Mrg06	5D	368290887
avgbs_101888.1.14	Mrg11	7C	676462917
avgbs_101897.1.19	Mrg15	3C	209959854
avgbs_101943.1.31	Mrg03	5C	38409507
avgbs_10196.1.57	Mrg21	4D	225131137
avgbs_101982.1.56	Mrg13	2C	190135273
avgbs_102016.1.10	Mrg03	5C	537656275
avgbs_102038.1.37	Mrg03	5C	460646192
avgbs_102076.1.23	Mrg21	4D	221107771
avgbs_102077.1.47	Mrg06	5D	21544801
avgbs_102137.1.60	Mrg08	2D	473819379
avgbs_102221.1.53	Mrg17	6C	295517323
avgbs_102228.1.59	Mrg21	4D	294426244
avgbs_10224.1.48	Mrg11	7C	227638022
avgbs_102256.1.61	Mrg23	3A	384154281
avgbs_102323.1.12	Mrg03	5C	72683217
avgbs_102354.1.46	Mrg17	6C	483934128
avgbs_10236.1.56	Mrg02	NA	NA
avgbs_102378.1.45	Mrg13	NA	NA
avgbs_102380.1.60	Mrg11	7C	636464627
avgbs_10239.1.14	Mrg23	3A	37291286
avgbs_102393.1.60	Mrg18	1A	502100494
avgbs_102415.1.16	Mrg01	NA	NA
avgbs_102449.1.34	Mrg17	6C	620156097
avgbs_102465.1.41	Mrg09	4C	237912354
avgbs_102466.1.30	Mrg11	7C	32630140
avgbs_102469.1.46	Mrg08	NA	NA
avgbs_102489.1.16	Mrg18	1A	540224284
avgbs_102524.1.23	Mrg09	4C	545530230
avgbs_102612.1.40	Mrg28	1C	400228278
avgbs_102627.1.16	Mrg01	1D	130599723
avgbs_102632.1.64	Mrg20	4D	305763551
avgbs_102674.1.21	Mrg28	1C	40332920
avgbs_102716.1.56	Mrg13	2C	547320415
avgbs_102720.1.27	Mrg24	4C	551470546
avgbs_102738.1.50	Mrg23	3A	230009423
avgbs_102755.1.29	Mrg24	NA	NA
avgbs_102762.1.50	Mrg19	3D	442197334
avgbs_102807.1.21	Mrg01	1D	47363329
avgbs_102811.1.28	Mrg02	7D	397804642
avgbs_102831.1.36	Mrg15	3C	19396789
avgbs_102844.1.36	Mrg15	NA	NA
avgbs_102864.1.55	Mrg24	5A	187407845
avgbs_102885.1.31	Mrg05	6A	221856418
avgbs_102887.1.29	Mrg11	7C	254003668
avgbs_103101.1.27	Mrg18	1A	472190430
avgbs_103111.1.55	Mrg04	6D	242139557
avgbs_103135.1.9	Mrg03	5C	510345516
avgbs_103146.1.14	Mrg20	4A	418412899
avgbs_103202.1.60	Mrg12	7A	93593169
avgbs_103205.1.39	Mrg24	5D	135506560
avgbs_103211.1.58	Mrg02	7D	512918245
avgbs_10324.1.31	Mrg09	4C	495998318
avgbs_103265.1.24	Mrg01	1D	341460821
avgbs_10331.1.27	Mrg17	NA	NA
avgbs_103330.1.8	Mrg09	4C	37515426
avgbs_103420.1.27	Mrg17	6C	559849770
avgbs_103432.1.10	Mrg28	1C	455313396
avgbs_103461.1.42	Mrg11	7C	464699519
avgbs_103489.1.52	Mrg19	3D	421866148
avgbs_103509.1.36	Mrg11	7C	532153495
avgbs_10353.1.24	Mrg01	1D	455794129
avgbs_103570.1.42	Mrg11	7C	363875824
avgbs_103663.1.13	Mrg09	4C	31259594
avgbs_103678.1.19	Mrg28	NA	NA
avgbs_10368.1.47	Mrg18	1A	542744648
avgbs_10369.1.7	Mrg04	6D	259170267
avgbs_103695.1.23	Mrg01	1D	475037530
avgbs_103699.1.60	Mrg12	7A	469831683
avgbs_10371.1.9	Mrg08	2D	503792217
avgbs_103756.1.22	Mrg15	3C	480467289
avgbs_103787.1.18	Mrg18	1A	475327232
avgbs_103793.1.24	Mrg15	3C	28314110
avgbs_103796.1.32	Mrg17	6C	597460016
avgbs_103822.1.30	Mrg05	6A	202318483
avgbs_103829.1.61	Mrg21	4D	386127647
avgbs_103831.1.16	Mrg20	4A	296518412
avgbs_10388.1.35	Mrg18	1A	455804214
avgbs_103966.1.16	Mrg15	3C	531987624
avgbs_103988.1.24	Mrg05	6A	347755256
avgbs_104028.1.28	Mrg11	7C	682282259
avgbs_10408.1.61	Mrg17	5C	573899811
avgbs_104125.1.32	Mrg18	NA	NA
avgbs_10419.1.26	Mrg01	1D	333717808
avgbs_104218.1.35	Mrg09	4C	172730644
avgbs_10422.1.6	Mrg09	4C	398854424
avgbs_104276.1.27	Mrg09	4C	495836430
avgbs_104327.1.54	Mrg12	7A	308721559
avgbs_104350.1.27	Mrg05	6A	331540147
avgbs_104361.1.20	Mrg11	7C	25332311
avgbs_104366.1.22	Mrg19	3D	449109295
avgbs_10437.1.35	Mrg17	6C	600633062
avgbs_104397.1.51	Mrg17	6C	84229817
avgbs_104398.1.38	Mrg21	4D	420067512
avgbs_104400.1.23	Mrg08	2D	24098248
avgbs_104405.1.22	Mrg08	2D	514905488
avgbs_104420.1.52	Mrg21	4D	318974594
avgbs_104440.1.16	Mrg02	7D	249173997
avgbs_104486.1.35	Mrg13	2C	172852146
avgbs_104487.1.48	Mrg05	6A	271268773
avgbs_10449.1.7	Mrg12	7A	399706841
avgbs_1045.1.39	Mrg02	7D	432551409
avgbs_104579.1.10	Mrg12	7A	441975472
avgbs_104621.1.63	Mrg05	6A	13728044
avgbs_104628.1.46	Mrg24	5A	466408378
avgbs_10465.1.50	Mrg09	4D	264228510
avgbs_104664.1.14	Mrg17	NA	NA
avgbs_104667.1.47	Mrg13	2C	427122306
avgbs_104679.1.37	Mrg17	6C	529647107
avgbs_104684.1.41	Mrg11	7C	662228632
avgbs_104736.1.29	Mrg21	4D	249900880
avgbs_10474.1.38	Mrg08	2D	469662512
avgbs_104752.1.42	Mrg09	NA	NA
avgbs_104801.1.38	Mrg18	1A	490081882
avgbs_10481.1.35	Mrg20	4A	288173829
avgbs_104850.1.29	Mrg02	7D	126848612
avgbs_104861.1.22	Mrg24	5D	164241474
avgbs_104871.1.30	Mrg33	2A	413070663
avgbs_104888.1.38	Mrg33	2A	18687710
avgbs_104901.1.56	Mrg24	5A	370961190
avgbs_104920.1.27	Mrg06	5D	203731012
avgbs_104945.1.35	Mrg03	5C	31838820
avgbs_104950.1.61	Mrg21	4D	41870889
avgbs_10496.1.40	Mrg13	2C	454283726
avgbs_10497.1.7	Mrg11	7C	608608308
avgbs_104996.1.40	Mrg17	6C	482874939
avgbs_105006.1.39	Mrg23	3A	107782507
avgbs_105018.1.18	Mrg01	1D	46767851
avgbs_105036.1.63	Mrg02	7D	163231353
avgbs_105044.1.35	Mrg15	3C	1838934
avgbs_105102.1.39	Mrg17	6C	579684223
avgbs_105103.1.34	Mrg19	3D	406793668
avgbs_105110.1.43	Mrg11	3C	579196249
avgbs_105148.1.17	Mrg13	2C	282964503
avgbs_105159.1.18	Mrg23	3A	197172519
avgbs_105177.1.53	Mrg02	7D	148562336
avgbs_105180.1.43	Mrg08	2D	508021106
avgbs_105224.1.58	Mrg09	4C	112115559
avgbs_105227.1.34	Mrg17	6C	61241694
avgbs_105234.1.24	Mrg19	3D	8888733
avgbs_105353.1.33	Mrg28	1C	89301584
avgbs_105356.1.16	Mrg09	4C	107875408
avgbs_105363.1.28	Mrg03	5C	394344900
avgbs_105366.1.37	Mrg15	3C	418462861
avgbs_105368.1.38	Mrg02	5C	135117282
avgbs_105375.1.56	Mrg09	4C	374933476
avgbs_105377.1.56	Mrg28	1C	342205156
avgbs_10538.1.7	Mrg12	7A	120414590
avgbs_105387.1.18	Mrg24	NA	NA
avgbs_105420.1.36	Mrg20	NA	NA
avgbs_105454.1.20	Mrg08	NA	NA
avgbs_105463.1.20	Mrg17	6C	622584586
avgbs_105465.1.14	Mrg08	2D	469892655
avgbs_105545.1.14	Mrg13	2C	556625169
avgbs_105550.1.18	Mrg17	6C	503925153
avgbs_105580.1.58	Mrg11	7C	453654614
avgbs_105589.1.19	Mrg21	4D	248381533
avgbs_105597.1.60	Mrg01	1A	257778304
avgbs_105609.1.23	Mrg33	2A	404354111
avgbs_10565.1.54	Mrg17	NA	NA
avgbs_105659.1.40	Mrg09	4C	498085537
avgbs_105663.1.61	Mrg13	2C	338685126
avgbs_10567.1.64	Mrg06	5D	414911638
avgbs_105680.1.40	Mrg11	7C	146867933
avgbs_10569.1.14	Mrg05	6A	409955674
avgbs_105693.1.41	Mrg19	3D	426664537
avgbs_10571.1.51	Mrg11	7C	689745268
avgbs_10572.1.18	Mrg13	2C	367306963
avgbs_105738.1.53	Mrg12	7C	550237617
avgbs_105744.1.48	Mrg17	6C	513411997
avgbs_105753.1.11	Mrg09	4C	274096666
avgbs_105759.1.49	Mrg15	3C	618367066
avgbs_105760.1.27	Mrg21	4D	294503388
avgbs_105773.1.62	Mrg28	1C	11141375
avgbs_105778.1.44	Mrg18	1A	494528541
avgbs_105825.1.49	Mrg05	6A	304389079
avgbs_105828.1.63	Mrg01	1D	477807750
avgbs_105847.1.14	Mrg23	3A	321183507
avgbs_105848.1.51	Mrg13	2C	450924888
avgbs_105868.1.27	Mrg11	7C	458348638
avgbs_105876.1.33	Mrg09	4C	273794026
avgbs_105878.1.11	Mrg18	1A	457136940
avgbs_105916.1.58	Mrg05	6A	135004411
avgbs_105946.1.37	Mrg06	NA	NA
avgbs_105954.1.32	Mrg28	1C	38303594
avgbs_106002.1.28	Mrg08	2D	414919397
avgbs_106011.1.10	Mrg02	NA	NA
avgbs_106036.1.56	Mrg04	6D	242202677
avgbs_106037.1.40	Mrg17	6C	300905146
avgbs_106043.1.22	Mrg11	NA	NA
avgbs_106062.1.25	Mrg02	7D	289260472
avgbs_106084.1.31	Mrg17	6C	554039870
avgbs_10618.1.19	Mrg33	2A	397682993
avgbs_106196.1.30	Mrg03	5C	591671545
avgbs_106211.1.31	Mrg17	6C	175327753
avgbs_106242.1.10	Mrg01	1D	339889960
avgbs_106243.1.63	Mrg24	5D	96492483
avgbs_10626.1.54	Mrg09	4C	398565893
avgbs_106265.1.19	Mrg20	4A	289958013
avgbs_10627.1.18	Mrg04	6D	281571294
avgbs_106272.1.21	Mrg15	3C	621607401
avgbs_10630.1.41	Mrg20	4A	402675116
avgbs_106312.1.15	Mrg21	NA	NA
avgbs_106358.1.55	Mrg23	3A	286770272
avgbs_10637.1.30	Mrg09	4C	189125766
avgbs_106374.1.44	Mrg17	6C	471516732
avgbs_106376.1.44	Mrg05	6A	316134459
avgbs_10638.1.46	Mrg01	1D	290988252
avgbs_10644.1.60	Mrg15	3C	4985403
avgbs_106442.1.15	Mrg02	7D	232977889
avgbs_106450.1.54	Mrg11	7C	686491135
avgbs_106459.1.34	Mrg08	NA	NA
avgbs_106460.1.46	Mrg08	NA	NA
avgbs_106477.1.64	Mrg02	7D	329083168
avgbs_106499.1.26	Mrg11	NA	NA
avgbs_106506.1.42	Mrg08	2D	459711517
avgbs_106518.1.49	Mrg11	7C	35917269
avgbs_106529.1.15	Mrg13	2C	496153966
avgbs_106546.1.28	Mrg15	3C	537859103
avgbs_106558.1.27	Mrg01	1D	377904493
avgbs_106579.1.15	Mrg13	2C	496117522
avgbs_106584.1.7	Mrg21	4D	380361571
avgbs_106600.1.63	Mrg20	4A	207732152
avgbs_106651.1.23	Mrg23	3A	392748850
avgbs_106663.1.31	Mrg20	4A	415259891
avgbs_10668.1.63	Mrg15	3C	546628825
avgbs_106692.1.38	Mrg15	3C	620513876
avgbs_106717.1.59	Mrg11	7C	469738165
avgbs_106781.1.54	Mrg02	7D	74566406
avgbs_10679.1.48	Mrg06	5D	338266936
avgbs_106795.1.16	Mrg11	NA	NA
avgbs_106814.1.29	Mrg18	1A	527993535
avgbs_106815.1.53	Mrg24	5A	120426655
avgbs_10682.1.47	Mrg17	6C	15609029
avgbs_106828.1.54	Mrg02	7D	389922566
avgbs_10683.1.19	Mrg09	4C	398849519
avgbs_10686.1.16	Mrg06	5D	416571470
avgbs_106871.1.25	Mrg21	4D	14431724
avgbs_106875.1.61	Mrg23	3A	110526461
avgbs_106887.1.36	Mrg09	4C	506775226
avgbs_106904.1.29	Mrg09	4C	281088610
avgbs_106915.1.11	Mrg13	NA	NA
avgbs_106941.1.33	Mrg23	3A	75384099
avgbs_106955.1.8	Mrg03	5C	534211851
avgbs_106966.1.61	Mrg15	3C	556578787
avgbs_106995.1.56	Mrg02	7D	473979363
avgbs_107007.1.63	Mrg19	3D	430096704
avgbs_107029.1.15	Mrg06	5D	491059683
avgbs_107037.1.51	Mrg21	4D	8680857
avgbs_107043.1.38	Mrg01	4A	351319839
avgbs_107055.1.34	Mrg11	7C	325714490
avgbs_10711.1.35	Mrg01	1D	436117986
avgbs_107194.1.58	Mrg20	4A	1716169
avgbs_107197.1.9	Mrg23	3A	309546509
avgbs_107206.1.46	Mrg15	3C	634264172
avgbs_107217.1.30	Mrg20	4A	401154241
avgbs_107267.1.59	Mrg03	5C	571952816
avgbs_107296.1.39	Mrg01	NA	NA
avgbs_107301.1.38	Mrg21	4D	236631811
avgbs_107328.1.50	Mrg09	4C	529649454
avgbs_107357.1.48	Mrg15	3C	28161921
avgbs_107363.1.34	Mrg17	6C	404628689
avgbs_107368.1.35	Mrg09	4C	504808793
avgbs_107371.1.20	Mrg11	7C	10265256
avgbs_107386.1.22	Mrg15	3C	30322971
avgbs_107387.1.25	Mrg01	1D	167073378
avgbs_107394.1.14	Mrg03	5C	565837753
avgbs_107417.1.16	Mrg06	5D	94998198
avgbs_107421.1.33	Mrg11	7C	646244449
avgbs_107422.1.27	Mrg02	5C	134621646
avgbs_107424.1.17	Mrg09	4C	344817355
avgbs_107426.1.9	Mrg28	1C	451433825
avgbs_107429.1.20	Mrg13	2C	560040541
avgbs_107433.1.18	Mrg18	1A	458178237
avgbs_107447.1.14	Mrg13	2C	517134451
avgbs_107456.1.53	Mrg11	7C	42627851
avgbs_107460.1.48	Mrg13	2C	506529195
avgbs_107474.1.38	Mrg12	7A	220520005
avgbs_107483.1.52	Mrg06	5D	471217376
avgbs_107493.1.25	Mrg33	NA	NA
avgbs_107497.1.42	Mrg15	3C	486760457
avgbs_10753.1.63	Mrg15	3C	274274933
avgbs_107546.1.59	Mrg03	5C	592775651
avgbs_107561.1.38	Mrg02	7D	243705383
avgbs_107562.1.7	Mrg02	7D	10604059
avgbs_107568.1.22	Mrg23	3A	81706808
avgbs_107580.1.64	Mrg01	NA	NA
avgbs_107587.1.43	Mrg15	5D	431839634
avgbs_107597.1.31	Mrg03	5C	492038219
avgbs_107667.1.33	Mrg21	4D	377548784
avgbs_107668.1.21	Mrg17	6C	607970509
avgbs_107679.1.31	Mrg24	5D	101247501
avgbs_107685.1.31	Mrg05	6A	259625020
avgbs_107698.1.30	Mrg19	3D	402806869
avgbs_1077.1.26	Mrg17	6C	596620989
avgbs_107700.1.8	Mrg17	6C	595261850
avgbs_107729.1.22	Mrg06	5D	486538983
avgbs_107744.1.8	Mrg20	4A	378472768
avgbs_107766.1.8	Mrg02	7D	68501810
avgbs_107774.1.42	Mrg11	7C	389673613
avgbs_107777.1.15	Mrg11	7C	422752544
avgbs_107806.1.50	Mrg01	1D	421367102
avgbs_10782.1.12	Mrg11	NA	NA
avgbs_107845.1.43	Mrg17	NA	NA
avgbs_107847.1.31	Mrg03	5C	6571297
avgbs_107852.1.7	Mrg09	4C	138657417
avgbs_107855.1.25	Mrg12	7A	154530708
avgbs_107873.1.15	Mrg06	5A	449142102
avgbs_10789.1.59	Mrg21	4D	352443959
avgbs_107910.1.32	Mrg23	3A	393458648
avgbs_107948.1.12	Mrg24	5A	325201369
avgbs_107950.1.18	Mrg11	3C	562120965
avgbs_107969.1.28	Mrg09	4C	519200744
avgbs_107976.1.33	Mrg19	3D	435091098
avgbs_107984.1.38	Mrg05	6A	392997229
avgbs_108003.1.21	Mrg15	3C	209761887
avgbs_108013.1.42	Mrg24	NA	NA
avgbs_108022.1.35	Mrg03	NA	NA
avgbs_108024.1.46	Mrg05	6A	337261362
avgbs_108042.1.21	Mrg06	5D	357058428
avgbs_108043.1.20	Mrg01	1D	399157157
avgbs_108059.1.38	Mrg03	5C	587176350
avgbs_108120.1.54	Mrg05	6A	403029420
avgbs_108137.1.55	Mrg11	7C	568998398
avgbs_10814.1.8	Mrg04	NA	NA
avgbs_10816.1.12	Mrg28	1C	147531099
avgbs_108171.1.21	Mrg06	5A	446811211
avgbs_108172.1.27	Mrg01	1D	465029392
avgbs_108180.1.43	Mrg21	4D	172211151
avgbs_108181.1.11	Mrg01	1D	38955679
avgbs_10820.1.26	Mrg12	7A	228132239
avgbs_108242.1.14	Mrg20	4A	366024416
avgbs_108258.1.34	Mrg12	NA	NA
avgbs_10827.1.46	Mrg33	2A	385611349
avgbs_108293.1.62	Mrg06	NA	NA
avgbs_108294.1.45	Mrg06	5D	404565850
avgbs_108315.1.32	Mrg02	NA	NA
avgbs_108395.1.49	Mrg03	5C	601126306
avgbs_10841.1.44	Mrg08	2D	433199803
avgbs_108418.1.63	Mrg08	1A	499810096
avgbs_10849.1.39	Mrg21	4D	319781162
avgbs_10851.1.40	Mrg20	4A	412136149
avgbs_108532.1.26	Mrg24	5A	302996388
avgbs_108538.1.62	Mrg08	2D	506490662
avgbs_108542.1.20	Mrg08	NA	NA
avgbs_108557.1.8	Mrg02	7D	513587208
avgbs_108575.1.42	Mrg08	1A	499882969
avgbs_108617.1.28	Mrg04	NA	NA
avgbs_10862.1.14	Mrg15	3C	613479284
avgbs_10863.1.47	Mrg20	4A	396609512
avgbs_108645.1.42	Mrg03	5C	114732778
avgbs_108657.1.22	Mrg08	2D	506486110
avgbs_108663.1.20	Mrg11	7C	697605108
avgbs_108677.1.20	Mrg19	3D	437527129
avgbs_108681.1.60	Mrg01	1D	450059035
avgbs_108690.1.10	Mrg03	5C	413186063
avgbs_10873.1.28	Mrg12	7A	409684066
avgbs_108756.1.43	Mrg06	5D	422207546
avgbs_108794.1.8	Mrg11	7C	669885035
avgbs_10880.1.9	Mrg08	2D	493318654
avgbs_108809.1.55	Mrg21	NA	NA
avgbs_108818.1.34	Mrg18	1A	525020929
avgbs_10882.1.36	Mrg05	6A	271485670
avgbs_108876.1.35	Mrg23	3A	390110851
avgbs_108878.1.63	Mrg13	2C	503221243
avgbs_108883.1.57	Mrg18	1A	388126385
avgbs_108914.1.14	Mrg15	NA	NA
avgbs_108951.1.56	Mrg28	1C	449496850
avgbs_108975.1.35	Mrg02	7D	39334191
avgbs_108983.1.64	Mrg03	5C	477976352
avgbs_108984.1.26	Mrg06	5D	436842478
avgbs_10899.1.54	Mrg02	7D	475063691
avgbs_109.1.42	Mrg15	3C	554294557
avgbs_109004.1.7	Mrg13	2C	477693068
avgbs_109028.1.16	Mrg06	5D	430015934
avgbs_109031.1.52	Mrg20	4A	246577770
avgbs_10904.1.12	Mrg17	6C	543243738
avgbs_109056.1.32	Mrg04	6D	271615818
avgbs_109068.1.49	Mrg20	4A	355758217
avgbs_109074.1.53	Mrg01	1D	462143699
avgbs_109076.1.24	Mrg15	NA	NA
avgbs_109085.1.21	Mrg17	6C	551552217
avgbs_1091.1.30	Mrg19	3D	456115405
avgbs_109116.1.47	Mrg05	6A	350906464
avgbs_10912.1.16	Mrg17	6C	3866276
avgbs_109124.1.19	Mrg20	4A	427167669
avgbs_109131.1.33	Mrg21	4D	385274106
avgbs_109135.1.11	Mrg19	3D	418120522
avgbs_10916.1.53	Mrg13	2C	352191720
avgbs_109166.1.45	Mrg20	4A	457219391
avgbs_109185.1.18	Mrg01	1D	7887321
avgbs_109186.1.10	Mrg03	5C	549376194
avgbs_109193.1.21	Mrg02	7D	74025155
avgbs_109207.1.60	Mrg04	6D	288775803
avgbs_109237.1.63	Mrg02	NA	NA
avgbs_109263.1.32	Mrg21	4D	291834625
avgbs_109293.1.57	Mrg02	7D	35030168
avgbs_109303.1.40	Mrg11	NA	NA
avgbs_109306.1.44	Mrg12	7A	352799477
avgbs_109342.1.50	Mrg05	6A	300641040
avgbs_109415.1.58	Mrg20	4A	287954093
avgbs_10942.1.34	Mrg01	1D	449386787
avgbs_109422.1.53	Mrg24	5A	357600987
avgbs_109439.1.17	Mrg17	6C	580263406
avgbs_109449.1.17	Mrg13	NA	NA
avgbs_109455.1.38	Mrg03	5C	585412666
avgbs_109456.1.32	Mrg17	6C	553494025
avgbs_109473.1.7	Mrg06	5D	11428949
avgbs_109488.1.56	Mrg15	3C	49094190
avgbs_109489.1.26	Mrg15	NA	NA
avgbs_109532.1.25	Mrg17	6C	84618304
avgbs_109534.1.13	Mrg17	6C	88731706
avgbs_109553.1.40	Mrg24	5D	309106293
avgbs_109592.1.43	Mrg03	5C	9239793
avgbs_109611.1.16	Mrg33	2A	18606463
avgbs_109631.1.42	Mrg15	3C	20578914
avgbs_109633.1.53	Mrg15	3C	313582955
avgbs_109651.1.27	Mrg12	7A	425335946
avgbs_1097.1.24	Mrg20	4A	274648364
avgbs_109707.1.13	Mrg02	7D	51930560
avgbs_109753.1.59	Mrg08	2D	364439987
avgbs_109755.1.40	Mrg18	NA	NA
avgbs_109756.1.39	Mrg15	3C	475240537
avgbs_109795.1.64	Mrg18	1A	529392131
avgbs_109814.1.32	Mrg23	3A	16938654
avgbs_109828.1.24	Mrg09	4C	336633576
avgbs_109851.1.34	Mrg03	5C	460954732
avgbs_109852.1.30	Mrg17	6C	609849507
avgbs_10986.1.63	Mrg01	1D	357223250
avgbs_109875.1.15	Mrg02	7D	497682969
avgbs_109927.1.14	Mrg08	2D	509430387
avgbs_109934.1.15	Mrg01	1D	374776851
avgbs_109948.1.33	Mrg19	3D	445905864
avgbs_109986.1.23	Mrg05	6A	20676230
avgbs_11000.1.48	Mrg03	5C	568645871
avgbs_110013.1.57	Mrg24	5D	139299269
avgbs_110019.1.10	Mrg09	4C	124407096
avgbs_110039.1.37	Mrg08	2D	460739535
avgbs_110041.1.19	Mrg23	3A	180459797
avgbs_110054.1.50	Mrg09	4C	465058785
avgbs_110059.1.35	Mrg21	4D	98652039
avgbs_110071.1.23	Mrg24	5D	274984287
avgbs_110072.1.60	Mrg13	2C	485671021
avgbs_110082.1.35	Mrg23	3A	234228702
avgbs_110084.1.38	Mrg12	7A	52852678
avgbs_110125.1.33	Mrg11	7C	458018814
avgbs_110152.1.37	Mrg03	5C	325296052
avgbs_110173.1.13	Mrg28	NA	NA
avgbs_110239.1.36	Mrg21	4D	1945746
avgbs_110253.1.61	Mrg06	5D	444794073
avgbs_110262.1.14	Mrg02	7D	174963940
avgbs_110266.1.47	Mrg05	6A	31062832
avgbs_110267.1.39	Mrg02	7D	195207201
avgbs_110271.1.32	Mrg20	4A	323073153
avgbs_110306.1.10	Mrg02	7D	408094012
avgbs_110323.1.13	Mrg17	6C	130731691
avgbs_110325.1.62	Mrg18	1A	464430443
avgbs_110326.1.28	Mrg13	2C	338301510
avgbs_110371.1.30	Mrg21	4D	228208053
avgbs_110374.1.40	Mrg17	6C	503359997
avgbs_110380.1.64	Mrg03	5C	353922201
avgbs_11040.1.17	Mrg17	6C	35206816
avgbs_110403.1.12	Mrg13	2C	560470215
avgbs_110404.1.12	Mrg13	NA	NA
avgbs_110419.1.25	Mrg02	7D	346222163
avgbs_11042.1.33	Mrg17	6C	525417443
avgbs_110447.1.59	Mrg24	5A	33970600
avgbs_110454.1.10	Mrg06	5A	429988939
avgbs_110464.1.30	Mrg15	3C	496819279
avgbs_110493.1.15	Mrg01	1D	337838540
avgbs_110529.1.18	Mrg09	4C	96316327
avgbs_110533.1.41	Mrg28	1C	117373500
avgbs_110539.1.42	Mrg17	6C	526543320
avgbs_110556.1.59	Mrg06	5D	491226086
avgbs_110558.1.7	Mrg11	7C	43138208
avgbs_110564.1.25	Mrg09	4C	380323464
avgbs_110567.1.56	Mrg21	4D	73936861
avgbs_110569.1.33	Mrg03	NA	NA
avgbs_110601.1.60	Mrg17	6C	590781085
avgbs_110603.1.46	Mrg21	4D	391086984
avgbs_110628.1.62	Mrg15	3C	584979397
avgbs_110633.1.44	Mrg23	3A	320400548
avgbs_110647.1.50	Mrg03	5C	592863857
avgbs_110648.1.36	Mrg17	6C	57725831
avgbs_110656.1.13	Mrg01	1D	222998582
avgbs_110666.1.37	Mrg02	7C	463549892
avgbs_110675.1.54	Mrg19	3D	28148489
avgbs_110710.1.36	Mrg15	3C	485377059
avgbs_110713.1.44	Mrg01	1D	477797489
avgbs_110738.1.58	Mrg11	7C	665189199
avgbs_110739.1.49	Mrg05	6A	31508581
avgbs_11074.1.43	Mrg03	5C	589699239
avgbs_110740.1.24	Mrg09	4C	529426441
avgbs_11077.1.9	Mrg03	5C	338182457
avgbs_110779.1.57	Mrg03	5C	583940913
avgbs_110783.1.25	Mrg01	1A	364543359
avgbs_110804.1.56	Mrg05	6A	244648572
avgbs_110806.1.43	Mrg08	2D	347676953
avgbs_110813.1.41	Mrg21	4D	54503635
avgbs_110814.1.51	Mrg21	7A	178907332
avgbs_110827.1.14	Mrg15	3C	235993589
avgbs_110837.1.12	Mrg33	2A	360837360
avgbs_110867.1.49	Mrg09	4C	342942573
avgbs_110874.1.53	Mrg12	7A	421599800
avgbs_110876.1.43	Mrg20	4A	262795745
avgbs_110890.1.62	Mrg05	6A	176182
avgbs_110930.1.58	Mrg24	5A	424172388
avgbs_110939.1.48	Mrg03	5C	558454493
avgbs_110941.1.49	Mrg28	1C	438575857
avgbs_110942.1.25	Mrg02	7D	341392719
avgbs_110953.1.16	Mrg11	7C	480470093
avgbs_110980.1.52	Mrg24	5D	254616022
avgbs_110991.1.23	Mrg15	3C	44873075
avgbs_111026.1.17	Mrg20	4A	179673883
avgbs_111031.1.20	Mrg01	1A	250872926
avgbs_111053.1.44	Mrg24	5A	365249380
avgbs_11106.1.6	Mrg17	6C	358313124
avgbs_111066.1.7	Mrg05	6A	75218100
avgbs_111077.1.45	Mrg04	6D	81704092
avgbs_111090.1.49	Mrg01	1D	174765806
avgbs_111110.1.43	Mrg12	7A	243499204
avgbs_111122.1.33	Mrg13	2C	548838959
avgbs_111149.1.50	Mrg01	1D	163503434
avgbs_111150.1.22	Mrg28	1C	382629176
avgbs_111156.1.20	Mrg20	4A	315117523
avgbs_111162.1.13	Mrg03	5C	34454067
avgbs_11117.1.18	Mrg02	7D	55071697
avgbs_111199.1.14	Mrg02	7D	403142751
avgbs_111248.1.53	Mrg15	3C	482142891
avgbs_111251.1.25	Mrg24	NA	NA
avgbs_111254.1.38	Mrg21	4D	264080128
avgbs_111277.1.37	Mrg19	3D	436823309
avgbs_111282.1.21	Mrg06	5D	390737261
avgbs_111352.1.7	Mrg09	NA	NA
avgbs_11137.1.28	Mrg23	3A	11068997
avgbs_111376.1.37	Mrg08	2D	492813977
avgbs_111417.1.38	Mrg21	4D	338243552
avgbs_111428.1.50	Mrg20	4A	378163409
avgbs_111450.1.50	Mrg13	2C	46064784
avgbs_111455.1.48	Mrg03	5C	92356984
avgbs_111461.1.54	Mrg15	3C	39991734
avgbs_111469.1.8	Mrg15	3C	502271673
avgbs_111486.1.11	Mrg08	2D	518280718
avgbs_111491.1.62	Mrg19	3D	334463154
avgbs_111522.1.58	Mrg03	5C	12425636
avgbs_111540.1.9	Mrg03	5C	572473880
avgbs_111543.1.40	Mrg28	1C	143872134
avgbs_111545.1.55	Mrg03	5C	538355759
avgbs_111560.1.11	Mrg05	6A	328733117
avgbs_111562.1.63	Mrg06	5D	471645629
avgbs_111577.1.21	Mrg28	1C	70311573
avgbs_111605.1.39	Mrg24	5A	423770199
avgbs_111622.1.29	Mrg06	5D	451917231
avgbs_111624.1.22	Mrg20	4A	232655693
avgbs_111635.1.8	Mrg01	1D	160285358
avgbs_111647.1.46	Mrg11	7C	690260148
avgbs_111663.1.36	Mrg24	4C	550114187
avgbs_111668.1.35	Mrg24	2A	400389533
avgbs_111687.1.16	Mrg02	NA	NA
avgbs_11169.1.43	Mrg05	6A	383645699
avgbs_111695.1.18	Mrg23	3A	412129264
avgbs_111696.1.54	Mrg03	5C	568325788
avgbs_111717.1.24	Mrg17	6C	385337004
avgbs_111735.1.51	Mrg12	5C	580483806
avgbs_111743.1.21	Mrg17	6C	549089790
avgbs_111768.1.11	Mrg20	4A	187429365
avgbs_111778.1.34	Mrg13	2C	161203810
avgbs_111816.1.43	Mrg11	3C	591294196
avgbs_111821.1.17	Mrg03	5C	184513120
avgbs_111840.1.41	Mrg12	7A	40912757
avgbs_111870.1.38	Mrg01	1D	317740029
avgbs_111881.1.58	Mrg24	5D	303657854
avgbs_111921.1.24	Mrg02	7D	64170464
avgbs_11193.1.11	Mrg20	4A	230677847
avgbs_111950.1.7	Mrg23	3A	44701914
avgbs_112003.1.26	Mrg09	4C	542835303
avgbs_11205.1.29	Mrg03	5C	347736704
avgbs_1121.1.58	Mrg28	1A	279787852
avgbs_112129.1.44	Mrg11	7C	541686607
avgbs_112158.1.62	Mrg24	5A	121629993
avgbs_112174.1.43	Mrg33	2A	397729026
avgbs_112178.1.33	Mrg15	3C	38785797
avgbs_112213.1.63	Mrg23	3A	280427277
avgbs_112218.1.10	Mrg21	NA	NA
avgbs_112227.1.23	Mrg28	1C	424879309
avgbs_112241.1.29	Mrg15	3C	78454574
avgbs_112249.1.57	Mrg04	6D	16499194
avgbs_112262.1.20	Mrg12	7A	477168256
avgbs_112268.1.46	Mrg01	1D	395326260
avgbs_112293.1.10	Mrg06	5D	490430893
avgbs_112310.1.32	Mrg02	7D	57127817
avgbs_112355.1.13	Mrg05	6A	364418039
avgbs_112365.1.22	Mrg23	3A	378971004
avgbs_112369.1.30	Mrg19	3D	412782103
avgbs_112377.1.50	Mrg01	1D	380338279
avgbs_112378.1.32	Mrg19	3D	447120272
avgbs_11239.1.52	Mrg04	6D	199737857
avgbs_112390.1.46	Mrg01	1D	253273883
avgbs_112393.1.8	Mrg09	4C	221529393
avgbs_112401.1.40	Mrg01	1D	163593694
avgbs_112456.1.62	Mrg03	5C	428452101
avgbs_112514.1.36	Mrg15	3C	599099368
avgbs_112523.1.30	Mrg03	5C	93244280
avgbs_112581.1.23	Mrg17	NA	NA
avgbs_112598.1.48	Mrg23	NA	NA
avgbs_112600.1.33	Mrg09	4C	157455732
avgbs_112603.1.61	Mrg06	5D	438850795
avgbs_11263.1.21	Mrg04	6D	16908568
avgbs_112631.1.35	Mrg06	5D	442156399
avgbs_112632.1.57	Mrg17	6C	529819533
avgbs_112697.1.38	Mrg24	1D	443913741
avgbs_112704.1.50	Mrg28	1C	332933187
avgbs_112725.1.11	Mrg04	6D	25270536
avgbs_112728.1.15	Mrg17	7D	466958932
avgbs_112738.1.56	Mrg08	2D	145520987
avgbs_112775.1.8	Mrg03	5C	561824220
avgbs_112777.1.38	Mrg03	5C	556873586
avgbs_112799.1.22	Mrg21	4D	142790430
avgbs_112823.1.26	Mrg24	5A	46325798
avgbs_112834.1.34	Mrg33	2D	346928709
avgbs_112898.1.18	Mrg28	1A	335121794
avgbs_11290.1.58	Mrg05	6A	213049859
avgbs_112919.1.50	Mrg01	1D	120702530
avgbs_112929.1.8	Mrg20	4A	347118695
avgbs_112934.1.52	Mrg12	7A	192645854
avgbs_112938.1.46	Mrg01	1D	67948914
avgbs_112940.1.56	Mrg17	6C	43917081
avgbs_112947.1.31	Mrg15	3C	548078742
avgbs_112957.1.21	Mrg03	5C	595379718
avgbs_112972.1.28	Mrg03	5C	534119061
avgbs_112977.1.62	Mrg06	5D	33808004
avgbs_113021.1.48	Mrg21	NA	NA
avgbs_113023.1.58	Mrg03	5C	5446588
avgbs_11303.1.32	Mrg01	4A	342853402
avgbs_113038.1.30	Mrg09	4C	324602946
avgbs_113050.1.12	Mrg02	7D	347050115
avgbs_113063.1.56	Mrg09	4C	281587360
avgbs_113087.1.64	Mrg21	4D	28826875
avgbs_113088.1.39	Mrg09	NA	NA
avgbs_113171.1.37	Mrg28	NA	NA
avgbs_113215.1.14	Mrg13	2C	166753903
avgbs_113235.1.18	Mrg15	3C	191255302
avgbs_113250.1.31	Mrg21	4D	112617487
avgbs_11326.1.18	Mrg05	6A	53990261
avgbs_113260.1.59	Mrg21	4D	410517530
avgbs_113285.1.39	Mrg13	2C	526772849
avgbs_11329.1.18	Mrg21	4D	301980303
avgbs_113314.1.28	Mrg01	1A	3069646
avgbs_113325.1.8	Mrg18	1A	432912833
avgbs_113329.1.7	Mrg15	3C	18427691
avgbs_113334.1.15	Mrg08	2D	437122901
avgbs_113353.1.8	Mrg33	2A	432711226
avgbs_113360.1.13	Mrg03	5C	85967588
avgbs_113363.1.44	Mrg01	1A	299484524
avgbs_113379.1.32	Mrg09	Chr00	70806302
avgbs_11341.1.62	Mrg09	4C	203609116
avgbs_113460.1.14	Mrg17	NA	NA
avgbs_113493.1.8	Mrg02	7D	513234208
avgbs_113548.1.52	Mrg02	7D	362813995
avgbs_113579.1.26	Mrg18	NA	NA
avgbs_113589.1.64	Mrg23	3A	90631141
avgbs_113590.1.16	Mrg20	4D	375897330
avgbs_113664.1.45	Mrg13	2C	10229746
avgbs_113675.1.24	Mrg24	5A	407141908
avgbs_113724.1.8	Mrg17	6C	499347206
avgbs_113741.1.46	Mrg23	3A	137969324
avgbs_113760.1.28	Mrg17	6C	402501143
avgbs_113770.1.24	Mrg33	NA	NA
avgbs_113780.1.58	Mrg11	7C	222858618
avgbs_113786.1.26	Mrg04	6D	221314211
avgbs_113805.1.53	Mrg02	5C	163348488
avgbs_113824.1.61	Mrg02	7D	371931898
avgbs_113835.1.10	Mrg15	3C	47942604
avgbs_113838.1.48	Mrg04	6D	8291066
avgbs_113841.1.36	Mrg08	2D	350507828
avgbs_113857.1.62	Mrg06	5D	476099885
avgbs_113864.1.45	Mrg01	1D	439376163
avgbs_113906.1.7	Mrg17	NA	NA
avgbs_113928.1.45	Mrg06	5A	438781845
avgbs_113978.1.62	Mrg06	NA	NA
avgbs_114044.1.42	Mrg03	5C	115686748
avgbs_114046.1.25	Mrg28	1C	347971955
avgbs_114084.1.15	Mrg17	6C	10902814
avgbs_11409.1.17	Mrg13	2C	4801098
avgbs_114096.1.50	Mrg06	5D	84959963
avgbs_114122.1.54	Mrg06	5D	464352745
avgbs_114124.1.7	Mrg03	5C	109951447
avgbs_114145.1.9	Mrg03	5C	380363976
avgbs_11416.1.38	Mrg12	7A	64369204
avgbs_114170.1.11	Mrg03	5C	73539228
avgbs_114187.1.21	Mrg15	3C	489520857
avgbs_114195.1.19	Mrg02	NA	NA
avgbs_1142.1.31	Mrg19	3D	14760799
avgbs_114206.1.59	Mrg17	6C	455386748
avgbs_11422.1.36	Mrg09	4C	14749745
avgbs_114277.1.43	Mrg01	1D	370784250
avgbs_114292.1.10	Mrg20	NA	NA
avgbs_114294.1.13	Mrg03	5C	502993465
avgbs_114322.1.54	Mrg19	3D	465786239
avgbs_11434.1.36	Mrg02	7D	5733261
avgbs_114368.1.53	Mrg06	5D	85251446
avgbs_114373.1.36	Mrg09	4C	508665892
avgbs_114398.1.53	Mrg03	5C	543183457
avgbs_114402.1.64	Mrg17	6C	130058475
avgbs_114429.1.46	Mrg18	1A	532110762
avgbs_114440.1.61	Mrg28	1C	257146696
avgbs_114448.1.11	Mrg13	2C	516022985
avgbs_114489.1.33	Mrg28	1C	364559147
avgbs_114491.1.40	Mrg15	3C	487621560
avgbs_114493.1.37	Mrg11	NA	NA
avgbs_114502.1.7	Mrg15	3C	31299909
avgbs_114503.1.61	Mrg06	5D	260512553
avgbs_114531.1.16	Mrg01	7A	464276706
avgbs_114532.1.62	Mrg23	3C	19122933
avgbs_114541.1.39	Mrg04	6D	257674456
avgbs_114564.1.7	Mrg23	3A	209374691
avgbs_114569.1.59	Mrg06	NA	NA
avgbs_114596.1.36	Mrg06	5D	437141254
avgbs_114597.1.37	Mrg23	3A	15490051
avgbs_114611.1.20	Mrg15	3C	467662909
avgbs_114613.1.46	Mrg06	5D	37395343
avgbs_114619.1.20	Mrg17	6C	65678730
avgbs_114648.1.63	Mrg08	2D	515064675
avgbs_114653.1.19	Mrg17	6C	144048382
avgbs_114676.1.49	Mrg13	2C	519889395
avgbs_114691.1.64	Mrg17	6C	530356549
avgbs_114722.1.49	Mrg15	3C	555006325
avgbs_114773.1.47	Mrg01	1D	322213118
avgbs_11478.1.57	Mrg13	2C	44217526
avgbs_114784.1.9	Mrg20	4A	411193386
avgbs_11479.1.43	Mrg11	7C	39668086
avgbs_114794.1.33	Mrg21	NA	NA
avgbs_11480.1.62	Mrg21	4D	293319154
avgbs_114858.1.17	Mrg15	NA	NA
avgbs_114866.1.13	Mrg12	7A	195142758
avgbs_114867.1.13	Mrg12	NA	NA
avgbs_114921.1.13	Mrg11	7C	603962601
avgbs_114925.1.46	Mrg01	1D	340410600
avgbs_114952.1.16	Mrg11	7C	452156978
avgbs_114976.1.16	Mrg02	7D	138382229
avgbs_114982.1.64	Mrg23	3A	49273647
avgbs_114987.1.47	Mrg08	2D	440748806
avgbs_115003.1.16	Mrg01	1D	75325224
avgbs_115010.1.20	Mrg01	1D	394114941
avgbs_11502.1.49	Mrg08	2D	338506893
avgbs_115028.1.23	Mrg13	2C	390973026
avgbs_11503.1.40	Mrg02	7D	414164356
avgbs_115035.1.50	Mrg12	7A	90002569
avgbs_115083.1.39	Mrg09	4C	396813625
avgbs_115090.1.63	Mrg28	1C	29074128
avgbs_115091.1.62	Mrg09	4C	524290440
avgbs_115099.1.64	Mrg33	2A	403509277
avgbs_115108.1.40	Mrg21	4D	146625232
avgbs_115111.1.18	Mrg03	5C	40578900
avgbs_115117.1.34	Mrg09	4C	466769218
avgbs_115118.1.43	Mrg17	6C	217419468
avgbs_115131.1.7	Mrg18	1A	464810923
avgbs_115135.1.9	Mrg03	5C	538184142
avgbs_115137.1.54	Mrg06	5D	393219536
avgbs_115147.1.60	Mrg33	2A	433675405
avgbs_115148.1.27	Mrg08	2D	381787252
avgbs_115175.1.15	Mrg08	NA	NA
avgbs_115190.1.40	Mrg08	4D	6593933
avgbs_115192.1.51	Mrg24	NA	NA
avgbs_115193.1.42	Mrg15	3C	594112275
avgbs_115199.1.21	Mrg24	1D	446907928
avgbs_115202.1.60	Mrg13	2C	383793967
avgbs_115243.1.56	Mrg08	2D	507765225
avgbs_115244.1.38	Mrg01	1A	328156655
avgbs_115254.1.60	Mrg01	1D	434053000
avgbs_115256.1.32	Mrg01	1A	6772090
avgbs_1153.1.63	Mrg13	2C	361402290
avgbs_115302.1.12	Mrg17	6C	564184393
avgbs_115309.1.43	Mrg02	7A	286210711
avgbs_115316.1.24	Mrg23	3A	301320511
avgbs_115349.1.11	Mrg11	7C	558405946
avgbs_115353.1.10	Mrg17	6C	37120853
avgbs_115355.1.52	Mrg03	5C	541654934
avgbs_115359.1.18	Mrg21	4D	321220249
avgbs_115387.1.10	Mrg03	5C	2587948
avgbs_115422.1.36	Mrg09	4C	173905835
avgbs_11543.1.43	Mrg01	NA	NA
avgbs_115433.1.29	Mrg17	NA	NA
avgbs_115450.1.39	Mrg03	5C	498434677
avgbs_115453.1.20	Mrg01	1D	415456969
avgbs_115457.1.24	Mrg03	5C	398266181
avgbs_115484.1.63	Mrg13	2C	350609225
avgbs_115490.1.43	Mrg12	7A	408066785
avgbs_11552.1.29	Mrg09	4C	38344434
avgbs_115533.1.46	Mrg09	4C	111715115
avgbs_115570.1.19	Mrg28	NA	NA
avgbs_115578.1.34	Mrg06	5D	399608763
avgbs_11559.1.55	Mrg08	2D	379424483
avgbs_115604.1.44	Mrg21	4A	461062829
avgbs_115612.1.13	Mrg15	3C	492711800
avgbs_115614.1.52	Mrg18	1A	472330200
avgbs_115640.1.18	Mrg11	7C	470330465
avgbs_115656.1.11	Mrg20	4A	445160491
avgbs_115678.1.37	Mrg23	3A	208278310
avgbs_115679.1.27	Mrg24	NA	NA
avgbs_115721.1.46	Mrg24	2A	400390591
avgbs_11575.1.25	Mrg13	2C	104764425
avgbs_115756.1.11	Mrg01	1D	276012609
avgbs_115757.1.19	Mrg11	7C	686885430
avgbs_115789.1.23	Mrg03	5C	12948449
avgbs_115842.1.29	Mrg12	NA	NA
avgbs_115854.1.53	Mrg18	Chr00	93288435
avgbs_115857.1.52	Mrg21	4D	420045333
avgbs_115858.1.29	Mrg03	5C	605770665
avgbs_115950.1.42	Mrg15	3C	23116893
avgbs_115954.1.31	Mrg24	NA	NA
avgbs_115956.1.42	Mrg21	4D	384069446
avgbs_116000.1.18	Mrg06	5D	92582553
avgbs_116014.1.61	Mrg01	5A	461883172
avgbs_116015.1.41	Mrg03	5C	582479574
avgbs_116017.1.27	Mrg20	4A	179497853
avgbs_116018.1.27	Mrg20	NA	NA
avgbs_116044.1.30	Mrg17	6C	563299646
avgbs_116057.1.41	Mrg15	3C	253411967
avgbs_116079.1.21	Mrg05	6A	198155737
avgbs_116088.1.13	Mrg09	4C	491427277
avgbs_116117.1.29	Mrg11	7C	198577651
avgbs_116123.1.8	Mrg28	1C	443115589
avgbs_116141.1.36	Mrg02	NA	NA
avgbs_116152.1.53	Mrg18	1A	517455320
avgbs_116162.1.53	Mrg15	3C	32776001
avgbs_116164.1.52	Mrg17	6C	550209448
avgbs_116165.1.55	Mrg15	3C	257761961
avgbs_116185.1.18	Mrg20	4A	439430888
avgbs_116246.1.23	Mrg13	2C	504826149
avgbs_116254.1.62	Mrg03	5C	531743326
avgbs_116290.1.26	Mrg02	7D	433378445
avgbs_116301.1.11	Mrg09	4C	171963470
avgbs_116329.1.39	Mrg13	2C	490238039
avgbs_116335.1.28	Mrg13	2C	426993370
avgbs_116358.1.35	Mrg23	3A	161248215
avgbs_116363.1.48	Mrg08	2D	475726884
avgbs_116370.1.54	Mrg08	2D	348361982
avgbs_116373.1.35	Mrg09	4C	8134433
avgbs_116380.1.32	Mrg24	4D	241190627
avgbs_11639.1.17	Mrg08	NA	NA
avgbs_116447.1.8	Mrg01	1D	238019106
avgbs_116473.1.27	Mrg19	NA	NA
avgbs_116484.1.50	Mrg08	NA	NA
avgbs_116510.1.34	Mrg03	5C	495584377
avgbs_11655.1.50	Mrg02	7D	417914804
avgbs_116601.1.32	Mrg12	NA	NA
avgbs_116602.1.59	Mrg21	4D	216621218
avgbs_116613.1.10	Mrg05	6A	776776
avgbs_116635.1.17	Mrg08	NA	NA
avgbs_116673.1.20	Mrg01	1D	337911882
avgbs_116683.1.36	Mrg03	5C	379812194
avgbs_116690.1.35	Mrg13	2C	498668530
avgbs_116709.1.59	Mrg20	4A	292919893
avgbs_116741.1.12	Mrg24	5D	268200742
avgbs_116742.1.45	Mrg23	3A	151298499
avgbs_116759.1.38	Mrg02	7D	168290285
avgbs_116788.1.8	Mrg24	4A	65871487
avgbs_116791.1.33	Mrg17	6C	408332945
avgbs_116795.1.25	Mrg09	4C	543826764
avgbs_116822.1.11	Mrg06	5D	479623149
avgbs_116834.1.53	Mrg03	5C	543545684
avgbs_116879.1.18	Mrg05	NA	NA
avgbs_116891.1.44	Mrg15	3C	19138251
avgbs_116906.1.55	Mrg05	6A	265239026
avgbs_116951.1.14	Mrg24	5A	291646554
avgbs_117009.1.56	Mrg03	5C	510735240
avgbs_117021.1.57	Mrg23	3A	313908589
avgbs_11705.1.39	Mrg17	6C	549719369
avgbs_117090.1.10	Mrg11	7C	52222133
avgbs_117095.1.9	Mrg18	1A	524664400
avgbs_117101.1.43	Mrg15	3C	580272243
avgbs_117108.1.64	Mrg11	7C	391198134
avgbs_117142.1.28	Mrg06	5D	358818453
avgbs_117148.1.29	Mrg12	7A	9310774
avgbs_117159.1.25	Mrg01	1D	321991446
avgbs_117163.1.53	Mrg15	3C	574748243
avgbs_117177.1.53	Mrg18	1A	414265078
avgbs_117192.1.16	Mrg17	NA	NA
avgbs_117215.1.62	Mrg21	4D	17951809
avgbs_117226.1.11	Mrg03	NA	NA
avgbs_11723.1.59	Mrg21	4D	287962310
avgbs_117230.1.9	Mrg09	NA	NA
avgbs_117232.1.46	Mrg24	7A	412820781
avgbs_117250.1.27	Mrg13	2C	412401001
avgbs_117254.1.22	Mrg03	5C	559996655
avgbs_11726.1.18	Mrg33	2D	346257308
avgbs_117291.1.40	Mrg21	4D	416909210
avgbs_11733.1.18	Mrg01	1D	290929132
avgbs_117341.1.53	Mrg33	2A	374612218
avgbs_117343.1.13	Mrg09	4C	340057396
avgbs_117382.1.30	Mrg03	5C	405422631
avgbs_117384.1.38	Mrg09	4C	466540515
avgbs_117417.1.8	Mrg04	6D	50814417
avgbs_117418.1.9	Mrg08	2D	511682596
avgbs_117439.1.29	Mrg04	6D	288403227
avgbs_117484.1.34	Mrg21	4A	337503207
avgbs_117551.1.58	Mrg13	2C	555630705
avgbs_117562.1.32	Mrg11	7C	6475666
avgbs_117567.1.25	Mrg08	NA	NA
avgbs_117626.1.63	Mrg24	5A	5078844
avgbs_117646.1.55	Mrg21	4D	295800286
avgbs_117650.1.49	Mrg04	6D	17064659
avgbs_117651.1.12	Mrg11	7C	10191831
avgbs_117661.1.17	Mrg18	1A	504651578
avgbs_117667.1.18	Mrg01	1D	470760959
avgbs_117693.1.31	Mrg12	7A	2565731
avgbs_117800.1.59	Mrg03	5C	534605777
avgbs_117841.1.50	Mrg06	5D	365267705
avgbs_117855.1.24	Mrg03	5C	541058254
avgbs_117870.1.55	Mrg01	1D	267666990
avgbs_117885.1.61	Mrg33	2A	404091645
avgbs_117900.1.16	Mrg21	NA	NA
avgbs_117904.1.19	Mrg01	NA	NA
avgbs_117922.1.30	Mrg08	2D	461488884
avgbs_117947.1.54	Mrg20	4A	402605184
avgbs_117948.1.11	Mrg04	6D	13818710
avgbs_11797.1.13	Mrg15	3C	569878734
avgbs_118009.1.54	Mrg05	6A	409638350
avgbs_118045.1.14	Mrg19	NA	NA
avgbs_118051.1.17	Mrg09	4C	520155590
avgbs_118072.1.19	Mrg13	2C	48095426
avgbs_118082.1.26	Mrg03	5C	545095177
avgbs_118117.1.64	Mrg05	6A	168254861
avgbs_11814.1.14	Mrg15	NA	NA
avgbs_118149.1.52	Mrg02	7D	399191261
avgbs_118168.1.38	Mrg08	2D	10685092
avgbs_118180.1.62	Mrg09	4C	137208383
avgbs_118186.1.53	Mrg33	2A	388453405
avgbs_118195.1.14	Mrg21	NA	NA
avgbs_118197.1.50	Mrg01	1D	450059758
avgbs_11820.1.23	Mrg05	NA	NA
avgbs_118202.1.52	Mrg17	6C	577099451
avgbs_118220.1.23	Mrg11	7C	219946728
avgbs_11823.1.6	Mrg09	4C	467518047
avgbs_118266.1.14	Mrg13	NA	NA
avgbs_118279.1.38	Mrg21	4D	106081846
avgbs_118285.1.52	Mrg08	2D	209357481
avgbs_118289.1.44	Mrg19	3D	323489014
avgbs_118291.1.41	Mrg11	3C	593296214
avgbs_118300.1.40	Mrg02	5C	130057503
avgbs_118369.1.23	Mrg18	1A	440453739
avgbs_118390.1.35	Mrg20	4A	209915803
avgbs_118413.1.53	Mrg17	6C	497915478
avgbs_118437.1.45	Mrg19	3D	407393767
avgbs_118448.1.22	Mrg15	3C	567650854
avgbs_11845.1.62	Mrg18	1A	499047661
avgbs_118450.1.30	Mrg06	5D	329737244
avgbs_118451.1.23	Mrg21	4D	329642019
avgbs_118456.1.19	Mrg17	6C	502135592
avgbs_118461.1.53	Mrg05	6A	43324490
avgbs_118483.1.54	Mrg13	2C	482111126
avgbs_11849.1.40	Mrg08	2D	380281916
avgbs_11851.1.34	Mrg15	3C	35807683
avgbs_118511.1.48	Mrg24	5A	477647659
avgbs_118512.1.14	Mrg11	7C	57430729
avgbs_118526.1.40	Mrg15	3C	101627374
avgbs_118527.1.55	Mrg08	2D	350005691
avgbs_118540.1.10	Mrg15	3C	579194764
avgbs_118565.1.38	Mrg20	4A	353204456
avgbs_118589.1.26	Mrg03	5C	407895672
avgbs_11860.1.52	Mrg24	5A	472585926
avgbs_118616.1.17	Mrg06	5D	476784690
avgbs_11862.1.18	Mrg06	5D	498938821
avgbs_118627.1.9	Mrg08	2D	495214518
avgbs_118634.1.12	Mrg01	1A	342323882
avgbs_118666.1.41	Mrg12	7A	2386452
avgbs_118707.1.33	Mrg15	3C	605229225
avgbs_118853.1.47	Mrg21	4D	316944239
avgbs_118871.1.47	Mrg15	3A	44476979
avgbs_118899.1.38	Mrg08	2D	376772665
avgbs_118916.1.11	Mrg09	4C	411407582
avgbs_11893.1.53	Mrg24	2A	400360279
avgbs_118930.1.54	Mrg08	NA	NA
avgbs_118941.1.63	Mrg13	2C	476500367
avgbs_119002.1.56	Mrg15	3C	628024962
avgbs_119007.1.31	Mrg11	7C	568023230
avgbs_119013.1.22	Mrg06	5D	414147565
avgbs_11902.1.38	Mrg02	7D	22485879
avgbs_119048.1.27	Mrg01	1D	466717791
avgbs_119069.1.35	Mrg03	NA	NA
avgbs_11908.1.59	Mrg18	1A	519967676
avgbs_11909.1.14	Mrg18	1A	471472472
avgbs_119096.1.54	Mrg33	2A	333239202
avgbs_119107.1.13	Mrg18	1A	493110184
avgbs_119157.1.24	Mrg02	7D	4830073
avgbs_119168.1.40	Mrg17	6C	558324829
avgbs_119176.1.18	Mrg21	4D	20116255
avgbs_119189.1.11	Mrg21	4D	365070840
avgbs_11920.1.8	Mrg01	1D	7453809
avgbs_119238.1.41	Mrg11	3C	592602008
avgbs_11924.1.28	Mrg08	2D	524178972
avgbs_119244.1.45	Mrg15	3C	506380732
avgbs_119246.1.14	Mrg01	1D	363015834
avgbs_119247.1.39	Mrg18	1A	379676065
avgbs_119248.1.39	Mrg15	3C	5435539
avgbs_119258.1.20	Mrg13	2C	384052195
avgbs_119264.1.37	Mrg06	5D	478695782
avgbs_119304.1.27	Mrg21	4D	283165984
avgbs_119312.1.32	Mrg12	7A	361947613
avgbs_119323.1.43	Mrg01	1D	360092638
avgbs_119356.1.61	Mrg08	2D	6923726
avgbs_119392.1.50	Mrg24	5A	409253127
avgbs_119398.1.7	Mrg02	5C	24968603
avgbs_119403.1.57	Mrg03	5C	400758137
avgbs_119411.1.28	Mrg28	1C	407785348
avgbs_11942.1.42	Mrg06	5D	447593771
avgbs_119433.1.42	Mrg12	7A	402815249
avgbs_119436.1.31	Mrg17	6C	505700723
avgbs_119438.1.15	Mrg11	7C	55694563
avgbs_119452.1.10	Mrg11	7C	577323121
avgbs_119453.1.58	Mrg04	6D	256035659
avgbs_119456.1.43	Mrg12	7A	353094444
avgbs_119457.1.60	Mrg02	7D	315444035
avgbs_119467.1.15	Mrg11	7C	337530699
avgbs_119473.1.62	Mrg20	4A	276531603
avgbs_119474.1.59	Mrg18	1A	519437067
avgbs_119484.1.20	Mrg08	2D	378034023
avgbs_119526.1.45	Mrg20	4A	281681743
avgbs_119576.1.9	Mrg13	2C	2283493
avgbs_119586.1.24	Mrg21	4D	3052983
avgbs_119595.1.23	Mrg17	6C	385559406
avgbs_1196.1.51	Mrg12	7A	168793974
avgbs_119649.1.52	Mrg15	3C	580625362
avgbs_119660.1.37	Mrg21	4A	338099237
avgbs_11968.1.15	Mrg06	5D	410008298
avgbs_119712.1.45	Mrg20	4A	209365466
avgbs_119718.1.43	Mrg12	7A	456943547
avgbs_11973.1.39	Mrg18	1A	530729700
avgbs_119731.1.50	Mrg04	6D	240639297
avgbs_119732.1.52	Mrg28	1C	23566286
avgbs_119733.1.20	Mrg20	4A	447021888
avgbs_11974.1.22	Mrg04	6D	253932361
avgbs_119768.1.33	Mrg06	5D	366970063
avgbs_119774.1.39	Mrg05	6A	324945386
avgbs_119824.1.12	Mrg05	6A	12005532
avgbs_119840.1.37	Mrg13	2C	551151487
avgbs_119891.1.13	Mrg17	6C	608807941
avgbs_119897.1.26	Mrg20	4A	432368505
avgbs_119941.1.12	Mrg02	7D	175816237
avgbs_119966.1.32	Mrg04	6D	217728672
avgbs_119971.1.16	Mrg03	5C	562633815
avgbs_119997.1.64	Mrg01	1D	287530250
avgbs_120017.1.28	Mrg01	1D	253617407
avgbs_120041.1.27	Mrg03	5C	598755596
avgbs_120049.1.47	Mrg08	2D	455303236
avgbs_120051.1.19	Mrg21	NA	NA
avgbs_120053.1.42	Mrg13	2C	526321611
avgbs_120076.1.53	Mrg21	NA	NA
avgbs_120080.1.42	Mrg03	5C	595390665
avgbs_12010.1.17	Mrg28	1C	191689374
avgbs_120104.1.17	Mrg23	3A	248532569
avgbs_120124.1.51	Mrg03	5C	537680590
avgbs_120130.1.47	Mrg09	4C	379634693
avgbs_120138.1.63	Mrg20	4A	280702783
avgbs_120167.1.29	Mrg21	NA	NA
avgbs_120170.1.11	Mrg02	3A	55742782
avgbs_120188.1.11	Mrg09	4C	443647276
avgbs_120189.1.15	Mrg03	NA	NA
avgbs_120222.1.64	Mrg24	5A	127326311
avgbs_12023.1.51	Mrg03	5C	584561471
avgbs_120241.1.21	Mrg01	1A	128396040
avgbs_120252.1.51	Mrg15	3C	282225358
avgbs_120256.1.52	Mrg12	7A	454723860
avgbs_120259.1.33	Mrg01	3A	181826700
avgbs_120260.1.37	Mrg33	2A	9678392
avgbs_120263.1.57	Mrg01	1A	12328762
avgbs_120270.1.50	Mrg24	5A	292942036
avgbs_120271.1.57	Mrg21	3A	84528446
avgbs_120275.1.25	Mrg23	3A	144500250
avgbs_120279.1.52	Mrg01	1D	194829101
avgbs_120287.1.22	Mrg23	3A	12673792
avgbs_120322.1.60	Mrg33	2A	379457431
avgbs_120334.1.18	Mrg21	4D	242881523
avgbs_120342.1.13	Mrg24	5A	114080193
avgbs_120358.1.42	Mrg11	7C	211711604
avgbs_120362.1.37	Mrg06	5D	463084276
avgbs_120370.1.49	Mrg24	5D	138683906
avgbs_120371.1.16	Mrg24	5A	132112211
avgbs_120378.1.14	Mrg04	6D	279180330
avgbs_120387.1.29	Mrg06	5A	448344801
avgbs_120401.1.32	Mrg12	7A	10223632
avgbs_120404.1.21	Mrg03	5C	605032401
avgbs_12041.1.17	Mrg23	3A	404685931
avgbs_120412.1.33	Mrg21	4D	394408697
avgbs_12044.1.35	Mrg01	NA	NA
avgbs_120446.1.64	Mrg13	2C	525742665
avgbs_120480.1.30	Mrg12	7A	102179423
avgbs_120491.1.21	Mrg09	4C	406754454
avgbs_120496.1.38	Mrg04	6D	284467812
avgbs_120526.1.11	Mrg09	4C	549881468
avgbs_120532.1.11	Mrg11	7C	315054215
avgbs_120533.1.16	Mrg24	5D	86957088
avgbs_120549.1.11	Mrg28	1C	422245425
avgbs_120556.1.28	Mrg33	NA	NA
avgbs_120563.1.44	Mrg11	7C	297785877
avgbs_120585.1.47	Mrg09	4C	528290405
avgbs_120621.1.9	Mrg19	3D	334396363
avgbs_120629.1.47	Mrg20	4A	410518053
avgbs_120630.1.26	Mrg17	6C	482695267
avgbs_120631.1.44	Mrg02	7D	398647473
avgbs_120648.1.62	Mrg24	5A	462130221
avgbs_12068.1.8	Mrg03	5C	531486752
avgbs_120693.1.45	Mrg12	7A	50863335
avgbs_120698.1.15	Mrg05	6A	4281011
avgbs_120706.1.24	Mrg05	6A	328442958
avgbs_120739.1.46	Mrg24	5D	154499597
avgbs_120751.1.50	Mrg20	4A	406808071
avgbs_120768.1.12	Mrg08	NA	NA
avgbs_120780.1.38	Mrg05	6A	353844892
avgbs_120807.1.29	Mrg17	6C	564866889
avgbs_120826.1.31	Mrg09	4C	67814413
avgbs_120830.1.50	Mrg04	6D	23793131
avgbs_120835.1.54	Mrg02	7D	403815362
avgbs_120849.1.8	Mrg21	2A	427795504
avgbs_120864.1.42	Mrg01	1D	93000952
avgbs_120891.1.28	Mrg11	7C	634499529
avgbs_12091.1.49	Mrg13	2C	557679346
avgbs_120926.1.15	Mrg17	6C	541470158
avgbs_120941.1.43	Mrg11	7C	529614774
avgbs_120947.1.55	Mrg03	5C	550108177
avgbs_120980.1.53	Mrg15	3C	37809189
avgbs_120996.1.37	Mrg03	5C	565047890
avgbs_121000.1.29	Mrg02	7D	88138858
avgbs_121001.1.32	Mrg01	1D	311332097
avgbs_121014.1.61	Mrg20	4A	190309289
avgbs_121043.1.61	Mrg12	7A	194754612
avgbs_121048.1.28	Mrg24	5D	97263195
avgbs_121057.1.33	Mrg12	7A	113530242
avgbs_121073.1.10	Mrg03	5C	398590771
avgbs_121088.1.44	Mrg09	4C	492643218
avgbs_12109.1.61	Mrg01	1D	271748252
avgbs_121090.1.61	Mrg12	7A	339455149
avgbs_12115.1.17	Mrg09	NA	NA
avgbs_121169.1.24	Mrg01	1D	466642279
avgbs_121192.1.45	Mrg08	NA	NA
avgbs_12123.1.47	Mrg28	1C	152680134
avgbs_121271.1.39	Mrg17	6C	605692359
avgbs_121281.1.9	Mrg03	5C	173536147
avgbs_121315.1.47	Mrg05	6A	376662037
avgbs_121326.1.15	Mrg03	5C	561545246
avgbs_121340.1.44	Mrg09	4C	76130988
avgbs_121374.1.18	Mrg19	3D	443346805
avgbs_121392.1.53	Mrg24	5A	473990282
avgbs_121395.1.18	Mrg21	4D	18135826
avgbs_121439.1.49	Mrg17	6C	401625398
avgbs_121444.1.11	Mrg02	Chr00	148507846
avgbs_121475.1.18	Mrg01	1D	38621042
avgbs_121492.1.63	Mrg13	2C	416907241
avgbs_121497.1.16	Mrg06	5D	404329531
avgbs_121499.1.23	Mrg21	NA	NA
avgbs_121508.1.23	Mrg12	7A	402666466
avgbs_121516.1.30	Mrg11	7C	465458760
avgbs_121542.1.26	Mrg21	4D	206788089
avgbs_121552.1.41	Mrg01	1D	389194332
avgbs_12156.1.47	Mrg12	7A	368747086
avgbs_121575.1.24	Mrg01	1D	140802795
avgbs_121577.1.40	Mrg15	3C	12688184
avgbs_121589.1.63	Mrg15	3C	527523157
avgbs_12159.1.52	Mrg24	5A	340899673
avgbs_121598.1.14	Mrg01	1D	312406086
avgbs_121607.1.61	Mrg23	3A	113818211
avgbs_121608.1.25	Mrg33	2A	396072047
avgbs_121609.1.19	Mrg15	3C	526170354
avgbs_121629.1.14	Mrg11	7C	39722756
avgbs_121649.1.43	Mrg01	NA	NA
avgbs_121695.1.29	Mrg20	4A	325062841
avgbs_121699.1.12	Mrg23	NA	NA
avgbs_1217.1.11	Mrg09	4C	514999182
avgbs_121703.1.64	Mrg02	5C	159937978
avgbs_121737.1.40	Mrg02	7D	337507874
avgbs_121757.1.58	Mrg33	2A	8016681
avgbs_121802.1.9	Mrg20	4A	280206735
avgbs_121809.1.61	Mrg23	3A	233155285
avgbs_121838.1.17	Mrg18	NA	NA
avgbs_121839.1.44	Mrg17	6C	345051169
avgbs_121869.1.11	Mrg01	1D	395791320
avgbs_121883.1.30	Mrg09	4C	196683175
avgbs_121957.1.34	Mrg20	4A	405750048
avgbs_121971.1.45	Mrg04	6C	35968621
avgbs_121976.1.61	Mrg11	7C	454280470
avgbs_121984.1.9	Mrg11	7C	668047438
avgbs_12199.1.8	Mrg17	6C	507108196
avgbs_121994.1.27	Mrg12	7A	343359002
avgbs_122027.1.30	Mrg11	3C	589308590
avgbs_122056.1.8	Mrg02	7D	93994056
avgbs_122137.1.29	Mrg08	NA	NA
avgbs_122145.1.45	Mrg09	4C	183276353
avgbs_122179.1.41	Mrg03	5C	561668489
avgbs_122203.1.18	Mrg01	1A	136483830
avgbs_122207.1.52	Mrg28	1C	428732971
avgbs_122213.1.48	Mrg21	4D	312134685
avgbs_122240.1.44	Mrg09	4C	299608144
avgbs_122245.1.45	Mrg09	4C	106749975
avgbs_122256.1.43	Mrg05	NA	NA
avgbs_122292.1.52	Mrg09	4C	548591772
avgbs_122346.1.16	Mrg02	NA	NA
avgbs_122366.1.43	Mrg15	3C	468781306
avgbs_122367.1.28	Mrg05	NA	NA
avgbs_122392.1.10	Mrg13	2C	297178261
avgbs_122396.1.41	Mrg09	4C	13819140
avgbs_122400.1.30	Mrg02	7D	9526873
avgbs_122437.1.44	Mrg01	1A	351821092
avgbs_122447.1.41	Mrg15	3C	115697284
avgbs_122488.1.8	Mrg03	5C	578877607
avgbs_122499.1.62	Mrg11	7C	294625361
avgbs_122505.1.34	Mrg01	1D	65281892
avgbs_122525.1.18	Mrg05	6A	49191074
avgbs_122528.1.17	Mrg24	5A	18560801
avgbs_122542.1.10	Mrg13	2C	480963480
avgbs_122617.1.28	Mrg09	4C	379273789
avgbs_122634.1.12	Mrg19	3D	20733666
avgbs_122665.1.18	Mrg23	3A	387337834
avgbs_122694.1.13	Mrg17	6C	558450245
avgbs_12272.1.9	Mrg12	7A	132959833
avgbs_122739.1.33	Mrg20	4A	453451361
avgbs_122746.1.19	Mrg15	3C	439040950
avgbs_122759.1.39	Mrg21	4D	403753255
avgbs_122760.1.18	Mrg03	5C	512342418
avgbs_122782.1.34	Mrg21	7D	464443732
avgbs_122791.1.47	Mrg01	1D	223497178
avgbs_122833.1.50	Mrg28	1C	300885972
avgbs_122845.1.63	Mrg01	1A	215613677
avgbs_122856.1.21	Mrg09	4C	197643719
avgbs_122880.1.45	Mrg02	7D	505434254
avgbs_122898.1.28	Mrg11	7C	615089715
avgbs_122900.1.33	Mrg11	7C	603998280
avgbs_122908.1.31	Mrg24	1D	436190354
avgbs_122911.1.17	Mrg03	5C	585418049
avgbs_122931.1.60	Mrg11	7C	250246043
avgbs_122942.1.35	Mrg17	6C	514972425
avgbs_122952.1.51	Mrg03	5C	603995306
avgbs_122956.1.19	Mrg15	3C	21480916
avgbs_122977.1.55	Mrg09	4C	501943534
avgbs_122978.1.63	Mrg21	4D	123964095
avgbs_122997.1.31	Mrg24	5D	109033648
avgbs_1230.1.32	Mrg21	4D	408998022
avgbs_123016.1.40	Mrg17	6C	10915373
avgbs_123026.1.40	Mrg24	5D	221729700
avgbs_123051.1.16	Mrg08	2D	389714699
avgbs_123075.1.41	Mrg17	NA	NA
avgbs_123116.1.38	Mrg04	6D	231445913
avgbs_123117.1.44	Mrg17	6C	494798553
avgbs_123123.1.28	Mrg03	5C	6840242
avgbs_123135.1.15	Mrg02	7D	525931095
avgbs_123140.1.48	Mrg15	3C	160059972
avgbs_123146.1.15	Mrg19	3D	413625987
avgbs_123152.1.11	Mrg09	4C	431547396
avgbs_123178.1.29	Mrg28	1C	442306116
avgbs_123184.1.10	Mrg12	7A	23931451
avgbs_123215.1.38	Mrg17	6C	105804052
avgbs_123224.1.12	Mrg17	6C	132288505
avgbs_123238.1.57	Mrg02	7D	418764305
avgbs_123274.1.26	Mrg21	4D	400578504
avgbs_123294.1.24	Mrg15	3C	17428830
avgbs_123299.1.24	Mrg04	6D	280426519
avgbs_1233.1.45	Mrg01	1A	242809274
avgbs_123320.1.54	Mrg04	6D	23477940
avgbs_123327.1.40	Mrg18	1A	472619048
avgbs_123345.1.53	Mrg06	5D	399718616
avgbs_123352.1.56	Mrg23	3A	421328199
avgbs_123375.1.9	Mrg08	2D	423406316
avgbs_12340.1.32	Mrg15	3C	23812489
avgbs_123426.1.39	Mrg13	2C	547342421
avgbs_12343.1.18	Mrg15	3C	15742283
avgbs_123469.1.22	Mrg17	6C	558021867
avgbs_123470.1.25	Mrg02	7D	57131752
avgbs_123506.1.45	Mrg11	7C	24858725
avgbs_123548.1.54	Mrg15	NA	NA
avgbs_123579.1.33	Mrg03	5C	557602772
avgbs_123604.1.20	Mrg09	4C	302977110
avgbs_123610.1.58	Mrg03	5C	390050068
avgbs_123667.1.22	Mrg03	NA	NA
avgbs_123691.1.20	Mrg15	3C	227328198
avgbs_123740.1.16	Mrg09	4C	508147662
avgbs_123763.1.24	Mrg17	6C	176254503
avgbs_123809.1.28	Mrg03	5C	506942424
avgbs_12383.1.19	Mrg02	7D	65194241
avgbs_123839.1.36	Mrg09	4C	25646692
avgbs_123845.1.40	Mrg03	5C	550280407
avgbs_123847.1.31	Mrg13	2C	93461624
avgbs_123856.1.42	Mrg03	NA	NA
avgbs_123877.1.45	Mrg01	4A	342760758
avgbs_123891.1.10	Mrg02	7D	11664991
avgbs_123918.1.14	Mrg04	NA	NA
avgbs_123933.1.12	Mrg05	6A	294081162
avgbs_123968.1.36	Mrg02	NA	NA
avgbs_123989.1.16	Mrg03	5C	602380942
avgbs_124046.1.22	Mrg18	1A	524683189
avgbs_124047.1.25	Mrg03	5C	425901178
avgbs_124068.1.58	Mrg20	4A	181927303
avgbs_124086.1.53	Mrg03	5C	496044731
avgbs_124099.1.29	Mrg09	4C	244097926
avgbs_124115.1.16	Mrg18	1A	364234751
avgbs_124116.1.32	Mrg13	2C	459040767
avgbs_124131.1.29	Mrg05	6A	212904692
avgbs_124135.1.54	Mrg03	5C	172030706
avgbs_124137.1.46	Mrg20	4A	178046612
avgbs_124149.1.24	Mrg09	4C	522538323
avgbs_124157.1.45	Mrg13	2C	348405818
avgbs_124165.1.48	Mrg20	4A	455949477
avgbs_124187.1.46	Mrg06	5D	329280228
avgbs_124191.1.40	Mrg08	2D	444777118
avgbs_124205.1.15	Mrg03	5C	90185920
avgbs_124206.1.35	Mrg03	5C	3702173
avgbs_124208.1.35	Mrg05	6A	54373664
avgbs_124222.1.39	Mrg11	7C	174881962
avgbs_124224.1.16	Mrg13	2C	495645362
avgbs_124241.1.19	Mrg08	2D	24769111
avgbs_124245.1.28	Mrg06	5D	472700174
avgbs_124273.1.43	Mrg01	1D	292793081
avgbs_124274.1.57	Mrg01	1A	300299312
avgbs_124278.1.53	Mrg33	2A	20102549
avgbs_124283.1.62	Mrg15	3C	635786337
avgbs_124299.1.42	Mrg15	3C	625838726
avgbs_124330.1.14	Mrg24	5A	101794034
avgbs_124347.1.51	Mrg17	6C	419149374
avgbs_124366.1.40	Mrg03	5C	116142218
avgbs_124388.1.63	Mrg03	5C	579014349
avgbs_124397.1.55	Mrg18	1A	472221689
avgbs_12440.1.41	Mrg15	3C	527280639
avgbs_124406.1.37	Mrg28	1C	46025340
avgbs_124422.1.9	Mrg12	7A	421963169
avgbs_124455.1.9	Mrg08	2D	391188327
avgbs_124468.1.13	Mrg18	1A	530318074
avgbs_124480.1.39	Mrg28	1C	441672551
avgbs_124488.1.45	Mrg24	5A	26868681
avgbs_12450.1.29	Mrg15	3C	373204812
avgbs_124511.1.11	Mrg18	1A	479452042
avgbs_124561.1.59	Mrg15	3C	28150957
avgbs_124566.1.16	Mrg17	6C	600884073
avgbs_124567.1.12	Mrg17	6C	600889302
avgbs_124571.1.23	Mrg03	5C	608585427
avgbs_12458.1.21	Mrg09	4C	11333602
avgbs_124656.1.9	Mrg09	4C	33950183
avgbs_124659.1.49	Mrg24	5D	105992696
avgbs_124661.1.23	Mrg18	NA	NA
avgbs_124663.1.28	Mrg09	4C	274115053
avgbs_124664.1.60	Mrg03	5C	230411629
avgbs_124669.1.43	Mrg28	1C	441991776
avgbs_124684.1.51	Mrg06	NA	NA
avgbs_124694.1.9	Mrg13	2C	431990610
avgbs_124720.1.43	Mrg17	6C	621531430
avgbs_124732.1.14	Mrg08	2D	42662094
avgbs_124796.1.60	Mrg06	5D	453805379
avgbs_124817.1.38	Mrg21	2A	420944040
avgbs_124840.1.29	Mrg12	7A	243071050
avgbs_124847.1.49	Mrg08	2D	395761317
avgbs_124853.1.29	Mrg28	1C	5963149
avgbs_124871.1.41	Mrg11	7C	112741475
avgbs_124896.1.44	Mrg09	4C	30052623
avgbs_124905.1.54	Mrg02	7D	398987910
avgbs_124930.1.47	Mrg23	3A	238467257
avgbs_124945.1.43	Mrg06	5D	476139436
avgbs_124961.1.47	Mrg11	7C	391005855
avgbs_124966.1.16	Mrg13	NA	NA
avgbs_124979.1.36	Mrg24	5A	66016252
avgbs_124991.1.19	Mrg15	3C	572721072
avgbs_125002.1.14	Mrg18	1A	509983262
avgbs_125015.1.63	Mrg23	3A	274868155
avgbs_125034.1.43	Mrg20	NA	NA
avgbs_125039.1.44	Mrg28	1C	268586089
avgbs_125044.1.15	Mrg05	6A	172671679
avgbs_125050.1.36	Mrg13	2C	555590778
avgbs_125058.1.59	Mrg03	5C	542884379
avgbs_125066.1.19	Mrg17	6C	441411725
avgbs_125072.1.39	Mrg13	2C	34545466
avgbs_125095.1.58	Mrg19	3D	386673826
avgbs_125103.1.25	Mrg11	7C	16298270
avgbs_125120.1.12	Mrg23	3A	170643817
avgbs_125121.1.14	Mrg09	4C	222760391
avgbs_125141.1.14	Mrg09	4C	203598913
avgbs_125149.1.40	Mrg06	5D	360455389
avgbs_125179.1.32	Mrg12	7A	14670341
avgbs_125180.1.35	Mrg15	3C	45174973
avgbs_125219.1.39	Mrg17	6C	544865594
avgbs_125225.1.10	Mrg20	NA	NA
avgbs_125290.1.49	Mrg21	4D	248849602
avgbs_125292.1.17	Mrg09	4C	523450854
avgbs_125306.1.54	Mrg19	3D	26390082
avgbs_125321.1.49	Mrg21	4D	237879092
avgbs_125322.1.56	Mrg20	4A	218811870
avgbs_125332.1.13	Mrg17	6C	545299129
avgbs_125333.1.37	Mrg04	6C	33976795
avgbs_125361.1.43	Mrg17	6C	499890647
avgbs_125378.1.24	Mrg20	4A	439921227
avgbs_125418.1.39	Mrg28	1C	37717921
avgbs_125423.1.19	Mrg03	5C	476327326
avgbs_125424.1.40	Mrg33	2A	391809138
avgbs_125426.1.49	Mrg15	3C	601732352
avgbs_125443.1.35	Mrg06	5D	475951175
avgbs_125449.1.28	Mrg23	3A	382972215
avgbs_125450.1.29	Mrg02	7D	355829849
avgbs_125487.1.43	Mrg06	5D	444159195
avgbs_12549.1.10	Mrg01	Chr00	203185101
avgbs_125505.1.61	Mrg05	6A	372477928
avgbs_12552.1.22	Mrg11	7C	641911869
avgbs_125553.1.48	Mrg17	6C	183903192
avgbs_125555.1.46	Mrg13	2C	359954390
avgbs_125574.1.19	Mrg06	5A	217876978
avgbs_125592.1.44	Mrg03	5C	135972399
avgbs_125646.1.33	Mrg13	2C	110236363
avgbs_125668.1.18	Mrg17	6C	501004242
avgbs_125678.1.45	Mrg03	5C	352418091
avgbs_125679.1.37	Mrg17	6C	545129260
avgbs_125682.1.54	Mrg28	1C	301356342
avgbs_12570.1.57	Mrg21	4D	191865775
avgbs_125701.1.46	Mrg13	2C	347937936
avgbs_125730.1.32	Mrg23	3A	198920048
avgbs_125750.1.52	Mrg02	7D	502739115
avgbs_125761.1.27	Mrg12	7A	215146253
avgbs_125762.1.27	Mrg12	NA	NA
avgbs_125774.1.18	Mrg08	2D	439764841
avgbs_125802.1.44	Mrg15	3C	572079521
avgbs_125809.1.54	Mrg23	3A	323826993
avgbs_125821.1.38	Mrg09	4C	361855465
avgbs_125823.1.34	Mrg01	1D	19063283
avgbs_125826.1.19	Mrg12	7A	190856059
avgbs_125851.1.51	Mrg13	2C	46478024
avgbs_125854.1.32	Mrg15	3C	13429084
avgbs_125865.1.35	Mrg23	3A	108833750
avgbs_125866.1.58	Mrg08	2D	158655258
avgbs_125874.1.10	Mrg06	5D	339918570
avgbs_125892.1.34	Mrg18	1A	524726747
avgbs_1259.1.31	Mrg01	1A	29510928
avgbs_125912.1.30	Mrg23	3A	132982592
avgbs_125929.1.27	Mrg18	1A	496263545
avgbs_125931.1.55	Mrg21	4D	95651257
avgbs_125943.1.15	Mrg09	4D	258897738
avgbs_125961.1.50	Mrg24	5D	256632028
avgbs_125968.1.14	Mrg11	7C	199041935
avgbs_12597.1.61	Mrg20	4A	411328743
avgbs_125970.1.51	Mrg11	7C	531747338
avgbs_125973.1.51	Mrg02	NA	NA
avgbs_125981.1.33	Mrg13	2C	162293589
avgbs_125991.1.55	Mrg15	3C	499855197
avgbs_126005.1.24	Mrg03	5C	497433923
avgbs_126020.1.16	Mrg04	6C	27919413
avgbs_126055.1.58	Mrg04	NA	NA
avgbs_12606.1.64	Mrg09	4C	223620049
avgbs_12607.1.28	Mrg02	7D	428766954
avgbs_126070.1.12	Mrg17	6C	584793007
avgbs_126076.1.25	Mrg01	1D	108190555
avgbs_126079.1.50	Mrg24	5D	329279247
avgbs_126105.1.15	Mrg03	5C	579013844
avgbs_126111.1.49	Mrg17	6C	3871514
avgbs_126133.1.36	Mrg03	5C	602217334
avgbs_12616.1.64	Mrg28	1C	446673808
avgbs_126160.1.30	Mrg20	4A	122793537
avgbs_126174.1.22	Mrg24	5A	466117885
avgbs_126197.1.44	Mrg02	7D	103765140
avgbs_126220.1.30	Mrg24	5D	152052314
avgbs_126262.1.20	Mrg01	1D	351570461
avgbs_126264.1.62	Mrg01	1D	350376323
avgbs_126285.1.14	Mrg13	2C	550454141
avgbs_126286.1.31	Mrg20	4A	432133313
avgbs_126295.1.37	Mrg21	4D	299702690
avgbs_126302.1.17	Mrg08	2D	439706452
avgbs_126304.1.15	Mrg20	4A	230659205
avgbs_126322.1.26	Mrg13	2C	378670733
avgbs_126328.1.51	Mrg20	4A	242282811
avgbs_126333.1.20	Mrg09	4C	518832418
avgbs_126335.1.20	Mrg21	NA	NA
avgbs_12647.1.31	Mrg06	5D	122742020
avgbs_12668.1.18	Mrg08	2D	474009637
avgbs_12681.1.23	Mrg24	NA	NA
avgbs_12692.1.20	Mrg17	6C	604026903
avgbs_12701.1.7	Mrg28	NA	NA
avgbs_1271.1.17	Mrg05	6A	176549318
avgbs_12718.1.12	Mrg18	1A	331894522
avgbs_12729.1.54	Mrg15	3C	633636824
avgbs_1274.1.48	Mrg04	6D	217730317
avgbs_12770.1.20	Mrg09	4C	483084012
avgbs_12791.1.48	Mrg15	3C	622857222
avgbs_12792.1.31	Mrg02	7D	51868260
avgbs_12813.1.14	Mrg15	3C	81825377
avgbs_12852.1.18	Mrg06	5D	67073627
avgbs_12865.1.26	Mrg02	7D	41261759
avgbs_12900.1.64	Mrg20	4A	345122351
avgbs_12927.1.25	Mrg11	7C	555198512
avgbs_12931.1.33	Mrg11	NA	NA
avgbs_1294.1.11	Mrg08	2D	284665323
avgbs_1295.1.48	Mrg33	2A	310383980
avgbs_13.1.41	Mrg02	7D	473139364
avgbs_13009.1.64	Mrg03	5C	419948573
avgbs_1302.1.44	Mrg21	4D	209951193
avgbs_13025.1.9	Mrg08	2D	366092146
avgbs_13044.1.40	Mrg15	3C	256481306
avgbs_1307.1.49	Mrg05	6A	197102500
avgbs_13090.1.45	Mrg09	4A	287503788
avgbs_1311.1.20	Mrg12	7A	312085855
avgbs_13128.1.12	Mrg09	4C	526400158
avgbs_13142.1.54	Mrg05	6A	415993723
avgbs_13155.1.32	Mrg17	6C	263357098
avgbs_1317.1.7	Mrg21	NA	NA
avgbs_13180.1.9	Mrg01	NA	NA
avgbs_13187.1.39	Mrg17	6C	334601342
avgbs_1319.1.37	Mrg13	2C	528536150
avgbs_13232.1.27	Mrg17	6C	501971839
avgbs_13252.1.34	Mrg18	1A	408128326
avgbs_13264.1.10	Mrg11	7C	681498334
avgbs_1328.1.18	Mrg05	6A	164085007
avgbs_13284.1.37	Mrg18	1A	464716927
avgbs_1329.1.18	Mrg12	7A	259130601
avgbs_13373.1.15	Mrg20	4D	372090439
avgbs_13380.1.31	Mrg33	2A	402713066
avgbs_13383.1.29	Mrg03	NA	NA
avgbs_13394.1.17	Mrg24	5A	164871963
avgbs_13395.1.17	Mrg11	NA	NA
avgbs_13421.1.6	Mrg01	1C	453119545
avgbs_1345.1.61	Mrg01	1D	286635396
avgbs_1346.1.42	Mrg05	2A	239705997
avgbs_13466.1.53	Mrg15	3C	577256638
avgbs_1347.1.61	Mrg01	1A	74143852
avgbs_13481.1.31	Mrg01	1D	455629417
avgbs_1352.1.57	Mrg05	NA	NA
avgbs_1355.1.55	Mrg02	7D	178079404
avgbs_13556.1.15	Mrg05	6A	328439427
avgbs_13616.1.38	Mrg06	5D	402353444
avgbs_13620.1.32	Mrg24	5A	474821253
avgbs_13639.1.13	Mrg11	NA	NA
avgbs_13657.1.28	Mrg05	6A	299623417
avgbs_13658.1.46	Mrg18	1A	489719210
avgbs_13692.1.59	Mrg02	7D	16710426
avgbs_13724.1.23	Mrg20	NA	NA
avgbs_13795.1.35	Mrg18	1A	374595406
avgbs_13835.1.20	Mrg03	5C	429309112
avgbs_13844.1.8	Mrg06	5D	340009056
avgbs_13897.1.7	Mrg12	7A	487414304
avgbs_13935.1.30	Mrg01	NA	NA
avgbs_13947.1.45	Mrg17	6C	455113848
avgbs_13956.1.59	Mrg13	2C	360010354
avgbs_1397.1.35	Mrg01	1A	10103619
avgbs_13970.1.37	Mrg20	4A	312063967
avgbs_14004.1.51	Mrg17	6C	457264563
avgbs_1403.1.10	Mrg21	4D	335339976
avgbs_1404.1.44	Mrg03	5C	517077403
avgbs_14059.1.34	Mrg03	5C	364047269
avgbs_1406.1.21	Mrg11	7C	619589919
avgbs_1408.1.12	Mrg06	5D	126279731
avgbs_14083.1.29	Mrg17	NA	NA
avgbs_1410.1.39	Mrg17	6C	533365851
avgbs_14102.1.21	Mrg24	5A	161378945
avgbs_14123.1.36	Mrg01	NA	NA
avgbs_14134.1.22	Mrg13	2C	506938890
avgbs_14179.1.20	Mrg13	NA	NA
avgbs_14188.1.28	Mrg23	3A	382925431
avgbs_14190.1.32	Mrg17	6C	474933792
avgbs_1420.1.18	Mrg02	7D	397805756
avgbs_14208.1.45	Mrg17	6C	69345434
avgbs_1421.1.6	Mrg11	7C	564931219
avgbs_14220.1.22	Mrg21	4D	401370134
avgbs_14278.1.17	Mrg08	2D	368016490
avgbs_14286.1.29	Mrg11	3C	147665703
avgbs_14309.1.28	Mrg17	NA	NA
avgbs_1432.1.19	Mrg20	4A	409291465
avgbs_14330.1.19	Mrg11	7C	608565932
avgbs_14332.1.18	Mrg11	7C	402867420
avgbs_14383.1.63	Mrg13	2C	405013621
avgbs_14388.1.41	Mrg28	3A	409227715
avgbs_14389.1.64	Mrg12	7A	477953285
avgbs_14397.1.46	Mrg08	2D	403007933
avgbs_1442.1.27	Mrg03	5C	554585280
avgbs_14426.1.60	Mrg15	3C	535789220
avgbs_1443.1.28	Mrg01	1D	375482379
avgbs_14438.1.40	Mrg04	6D	257738165
avgbs_14440.1.10	Mrg21	NA	NA
avgbs_14459.1.6	Mrg09	4C	45216043
avgbs_14475.1.30	Mrg03	5C	558592314
avgbs_14525.1.24	Mrg28	1C	212279663
avgbs_14529.1.54	Mrg03	5C	538789051
avgbs_14541.1.50	Mrg21	NA	NA
avgbs_14546.1.6	Mrg02	7D	315474580
avgbs_14556.1.32	Mrg21	4D	394215273
avgbs_14566.1.6	Mrg23	3A	373267880
avgbs_14567.1.55	Mrg12	7A	6403628
avgbs_14660.1.27	Mrg13	2C	46379619
avgbs_14665.1.22	Mrg28	1C	61737740
avgbs_14669.1.60	Mrg01	1D	423080548
avgbs_14672.1.30	Mrg02	7D	207958677
avgbs_14673.1.8	Mrg21	4D	228222239
avgbs_14697.1.33	Mrg23	NA	NA
avgbs_14699.1.56	Mrg09	4C	446042881
avgbs_14708.1.48	Mrg08	2D	464876863
avgbs_14729.1.43	Mrg24	5A	80896528
avgbs_14740.1.12	Mrg28	1C	30169454
avgbs_14761.1.47	Mrg21	4D	422531268
avgbs_14837.1.34	Mrg28	1C	352112298
avgbs_14850.1.27	Mrg09	4C	25734882
avgbs_14866.1.43	Mrg15	3C	492809754
avgbs_14872.1.57	Mrg28	1C	144461612
avgbs_14885.1.34	Mrg03	5C	68475708
avgbs_14886.1.51	Mrg11	7C	571926196
avgbs_14887.1.24	Mrg23	3A	82487965
avgbs_14913.1.9	Mrg03	5C	364783747
avgbs_14920.1.25	Mrg05	6A	211140813
avgbs_14933.1.43	Mrg12	7A	9317590
avgbs_14934.1.10	Mrg28	1C	92202042
avgbs_14960.1.17	Mrg02	7D	506578593
avgbs_14966.1.51	Mrg02	7D	3112774
avgbs_14968.1.8	Mrg02	5C	141571224
avgbs_14969.1.14	Mrg06	5A	437018077
avgbs_14975.1.40	Mrg19	3D	444522230
avgbs_14991.1.29	Mrg20	4A	192391832
avgbs_15000.1.22	Mrg09	4C	525398622
avgbs_15042.1.33	Mrg21	4D	154344990
avgbs_15058.1.34	Mrg13	2C	138024119
avgbs_1507.1.64	Mrg06	5D	64370317
avgbs_15073.1.12	Mrg06	5D	393904446
avgbs_15086.1.53	Mrg03	5C	608415580
avgbs_15089.1.9	Mrg19	3D	402786219
avgbs_151.1.56	Mrg04	NA	NA
avgbs_15110.1.33	Mrg02	7D	305976340
avgbs_15136.1.14	Mrg23	3A	26047083
avgbs_15140.1.49	Mrg03	5C	360433764
avgbs_15249.1.17	Mrg15	3C	7996936
avgbs_15271.1.29	Mrg11	3C	595384921
avgbs_15288.1.54	Mrg03	5C	510943876
avgbs_15294.1.8	Mrg20	NA	NA
avgbs_15301.1.35	Mrg11	NA	NA
avgbs_15314.1.16	Mrg24	5D	198498806
avgbs_15320.1.37	Mrg21	4D	250326673
avgbs_15323.1.31	Mrg06	5D	59585885
avgbs_1533.1.38	Mrg09	4C	388257171
avgbs_15332.1.53	Mrg17	6C	588883259
avgbs_15336.1.25	Mrg03	Chr00	186307748
avgbs_15348.1.10	Mrg02	NA	NA
avgbs_15355.1.11	Mrg21	4D	255980453
avgbs_15359.1.47	Mrg08	2D	490468684
avgbs_15361.1.50	Mrg05	6A	376249714
avgbs_15362.1.34	Mrg13	NA	NA
avgbs_15363.1.40	Mrg01	1D	350013281
avgbs_15383.1.62	Mrg09	4C	461373708
avgbs_15388.1.33	Mrg03	5C	548591053
avgbs_15395.1.37	Mrg15	3C	454518234
avgbs_15416.1.22	Mrg06	5D	16251250
avgbs_1547.1.6	Mrg04	6D	272997076
avgbs_15480.1.35	Mrg03	5C	582968361
avgbs_15498.1.61	Mrg01	1D	338338902
avgbs_15519.1.48	Mrg01	1D	129337287
avgbs_15527.1.6	Mrg03	5C	42749843
avgbs_15539.1.22	Mrg11	7C	46184241
avgbs_1555.1.39	Mrg21	4D	386816313
avgbs_15552.1.29	Mrg21	4D	396820090
avgbs_15553.1.36	Mrg13	2C	167233623
avgbs_1556.1.26	Mrg12	7A	51209669
avgbs_15582.1.12	Mrg13	2C	549181703
avgbs_15602.1.29	Mrg03	NA	NA
avgbs_15607.1.11	Mrg33	NA	NA
avgbs_15611.1.23	Mrg21	2A	427981535
avgbs_15613.1.25	Mrg24	5A	5093812
avgbs_15623.1.62	Mrg21	4D	178352150
avgbs_15630.1.19	Mrg24	5A	62925610
avgbs_15657.1.35	Mrg02	7D	31824545
avgbs_15660.1.49	Mrg23	3A	318669163
avgbs_1567.1.42	Mrg28	1C	203438412
avgbs_15768.1.39	Mrg17	6C	597158545
avgbs_15772.1.27	Mrg17	6C	439967859
avgbs_15781.1.45	Mrg06	5D	360168799
avgbs_15784.1.41	Mrg23	3A	388599593
avgbs_15811.1.25	Mrg11	7C	559282251
avgbs_15834.1.48	Mrg28	NA	NA
avgbs_15871.1.25	Mrg11	7C	145684232
avgbs_15874.1.55	Mrg23	3A	35722308
avgbs_15886.1.59	Mrg09	4C	155872490
avgbs_15913.1.64	Mrg17	6C	57057899
avgbs_15924.1.45	Mrg08	2D	481231182
avgbs_15933.1.37	Mrg04	NA	NA
avgbs_15951.1.34	Mrg01	1D	465607129
avgbs_16004.1.59	Mrg24	5A	105823099
avgbs_16012.1.27	Mrg11	7C	522810588
avgbs_16036.1.38	Mrg05	6A	8476611
avgbs_16037.1.27	Mrg02	7D	413761645
avgbs_16038.1.55	Mrg13	2C	511192045
avgbs_16078.1.15	Mrg01	NA	NA
avgbs_16098.1.15	Mrg15	3C	293876862
avgbs_161.1.18	Mrg17	6C	560680569
avgbs_16106.1.36	Mrg17	6C	57089055
avgbs_16148.1.12	Mrg09	4C	9334114
avgbs_16156.1.17	Mrg20	4A	438828885
avgbs_16157.1.13	Mrg13	2C	540944306
avgbs_16162.1.21	Mrg06	5D	19801001
avgbs_16186.1.56	Mrg24	5A	407907879
avgbs_16190.1.40	Mrg02	7D	300461111
avgbs_16201.1.59	Mrg20	4A	236561880
avgbs_16218.1.59	Mrg21	4D	424110632
avgbs_16306.1.47	Mrg17	6C	551170341
avgbs_16317.1.28	Mrg01	NA	NA
avgbs_16325.1.17	Mrg28	1C	310674972
avgbs_16344.1.62	Mrg08	2D	388243185
avgbs_16416.1.30	Mrg11	7C	483745995
avgbs_16432.1.22	Mrg03	5C	411218956
avgbs_16469.1.12	Mrg28	1C	87608233
avgbs_16490.1.16	Mrg12	7A	155966192
avgbs_16493.1.19	Mrg09	4C	346041350
avgbs_16517.1.52	Mrg03	5C	68733100
avgbs_16529.1.42	Mrg13	2C	219295849
avgbs_16554.1.30	Mrg13	2C	32545360
avgbs_16594.1.29	Mrg02	7D	242937974
avgbs_16597.1.29	Mrg12	7A	227151083
avgbs_16619.1.40	Mrg09	1A	78989472
avgbs_16625.1.41	Mrg02	7D	78581088
avgbs_16626.1.53	Mrg12	7A	75519791
avgbs_1664.1.32	Mrg17	6C	572586232
avgbs_16664.1.62	Mrg24	5D	334923271
avgbs_16668.1.22	Mrg12	7A	229667349
avgbs_16701.1.18	Mrg24	5A	425555652
avgbs_16714.1.44	Mrg09	4C	320688896
avgbs_16715.1.9	Mrg28	1C	354756795
avgbs_16720.1.23	Mrg15	3C	342275427
avgbs_1676.1.8	Mrg02	7D	37582358
avgbs_16774.1.64	Mrg04	6C	30865102
avgbs_16804.1.20	Mrg09	4C	64891443
avgbs_16820.1.44	Mrg04	6D	224440831
avgbs_16827.1.57	Mrg13	2C	11346829
avgbs_1688.1.53	Mrg15	3C	469060117
avgbs_1689.1.47	Mrg11	7C	543391910
avgbs_16946.1.36	Mrg05	6A	311075208
avgbs_16965.1.52	Mrg33	2A	405447173
avgbs_16987.1.28	Mrg12	7A	25093329
avgbs_16988.1.46	Mrg09	4C	534211809
avgbs_16996.1.54	Mrg15	3C	2669509
avgbs_17003.1.30	Mrg13	2C	442594491
avgbs_17018.1.35	Mrg15	3C	446787085
avgbs_17033.1.12	Mrg08	2D	492109474
avgbs_17039.1.20	Mrg24	5A	108729477
avgbs_17053.1.50	Mrg06	5D	404554052
avgbs_17067.1.8	Mrg21	4D	411400807
avgbs_17081.1.25	Mrg33	NA	NA
avgbs_17087.1.24	Mrg21	4D	356325597
avgbs_17088.1.15	Mrg23	3A	385237550
avgbs_17126.1.14	Mrg17	NA	NA
avgbs_17152.1.36	Mrg28	NA	NA
avgbs_17174.1.16	Mrg06	5D	411346240
avgbs_1722.1.32	Mrg19	3D	455102508
avgbs_17230.1.64	Mrg13	2C	496677539
avgbs_17253.1.63	Mrg09	4C	451395324
avgbs_17275.1.21	Mrg23	3A	349309541
avgbs_17276.1.59	Mrg12	7A	96400219
avgbs_17299.1.34	Mrg11	7C	251642876
avgbs_17331.1.27	Mrg03	5C	93058625
avgbs_17368.1.43	Mrg12	7A	71640158
avgbs_17403.1.36	Mrg11	7C	696121237
avgbs_17456.1.10	Mrg21	4D	301970427
avgbs_17457.1.10	Mrg05	6A	202312411
avgbs_17463.1.64	Mrg23	3A	284693650
avgbs_17464.1.61	Mrg06	5D	463901618
avgbs_1748.1.59	Mrg04	6D	62838549
avgbs_17485.1.21	Mrg21	NA	NA
avgbs_17486.1.20	Mrg23	NA	NA
avgbs_17487.1.20	Mrg05	6A	396140344
avgbs_17503.1.62	Mrg03	5C	401137202
avgbs_17532.1.36	Mrg05	6A	17137425
avgbs_17556.1.41	Mrg06	NA	NA
avgbs_17580.1.44	Mrg21	4A	338075533
avgbs_17582.1.24	Mrg33	2A	20935659
avgbs_17588.1.6	Mrg12	7A	372084247
avgbs_17593.1.63	Mrg12	7A	436449377
avgbs_17662.1.44	Mrg17	6C	44890840
avgbs_17665.1.32	Mrg06	5D	35461117
avgbs_17689.1.52	Mrg01	1D	354510761
avgbs_17691.1.10	Mrg24	5A	456470870
avgbs_17698.1.14	Mrg03	5C	492038259
avgbs_17732.1.32	Mrg21	4D	101463930
avgbs_17741.1.21	Mrg02	7D	509504641
avgbs_17745.1.6	Mrg11	7C	485180585
avgbs_17765.1.39	Mrg12	7A	446609656
avgbs_17797.1.54	Mrg08	2D	393674446
avgbs_17824.1.12	Mrg01	1D	15720084
avgbs_17826.1.39	Mrg20	4A	27403289
avgbs_17834.1.11	Mrg17	6C	415372966
avgbs_17854.1.11	Mrg21	4D	62413631
avgbs_17895.1.50	Mrg23	3C	534963019
avgbs_17897.1.47	Mrg03	5C	20348184
avgbs_17902.1.50	Mrg17	6C	504097434
avgbs_17929.1.58	Mrg24	5A	257173457
avgbs_17934.1.57	Mrg21	2A	423716883
avgbs_17941.1.57	Mrg02	7D	143772821
avgbs_17948.1.27	Mrg21	4D	170694871
avgbs_17968.1.51	Mrg06	5D	497941544
avgbs_17970.1.38	Mrg06	5D	369008237
avgbs_17994.1.14	Mrg18	1A	506432525
avgbs_17996.1.6	Mrg03	5C	63052732
avgbs_17997.1.61	Mrg02	7D	484874954
avgbs_18009.1.57	Mrg04	6C	34624209
avgbs_18016.1.55	Mrg17	6C	479898717
avgbs_18019.1.22	Mrg13	2C	547880712
avgbs_18109.1.35	Mrg06	5D	196395160
avgbs_1812.1.6	Mrg21	4A	265837611
avgbs_18166.1.14	Mrg11	7C	680798584
avgbs_18177.1.34	Mrg23	3A	96927984
avgbs_1822.1.25	Mrg02	7D	497387381
avgbs_18267.1.44	Mrg11	7C	212966308
avgbs_18284.1.40	Mrg24	5A	475164124
avgbs_1829.1.55	Mrg20	4A	290528891
avgbs_18306.1.53	Mrg23	3A	287336439
avgbs_18311.1.58	Mrg21	4D	85970873
avgbs_18335.1.41	Mrg12	7A	106607751
avgbs_18367.1.42	Mrg12	7A	314047251
avgbs_18371.1.23	Mrg02	7D	288944653
avgbs_18375.1.57	Mrg02	7D	361334887
avgbs_18376.1.48	Mrg23	3A	159296184
avgbs_18383.1.31	Mrg05	6A	44819462
avgbs_18403.1.64	Mrg12	7A	152426475
avgbs_18411.1.13	Mrg01	1D	102370908
avgbs_18415.1.53	Mrg12	7A	303048598
avgbs_18419.1.49	Mrg23	3A	57812787
avgbs_18454.1.16	Mrg09	4C	53379877
avgbs_18471.1.38	Mrg12	7A	339235314
avgbs_1850.1.28	Mrg12	7A	467798046
avgbs_18502.1.60	Mrg33	2A	385609934
avgbs_18503.1.37	Mrg17	6C	536603775
avgbs_18526.1.22	Mrg19	3D	432775584
avgbs_18536.1.28	Mrg09	4C	403600137
avgbs_18585.1.48	Mrg20	4A	243419073
avgbs_18591.1.52	Mrg01	1A	7358247
avgbs_18592.1.6	Mrg13	2C	555000613
avgbs_18601.1.26	Mrg13	2C	540154344
avgbs_18626.1.10	Mrg17	6C	610603367
avgbs_18656.1.16	Mrg02	7D	474105040
avgbs_18673.1.9	Mrg11	7C	522580466
avgbs_18689.1.29	Mrg11	7C	695750122
avgbs_18695.1.25	Mrg12	7A	322799721
avgbs_187.1.18	Mrg06	5D	473059079
avgbs_18725.1.20	Mrg20	4A	167885612
avgbs_18732.1.26	Mrg01	1D	380904869
avgbs_1874.1.57	Mrg01	1D	446427115
avgbs_18744.1.57	Mrg08	2D	427001213
avgbs_18758.1.64	Mrg11	7C	521908041
avgbs_188.1.42	Mrg15	3C	16494503
avgbs_18811.1.59	Mrg17	6C	543103967
avgbs_18812.1.60	Mrg15	3C	586295887
avgbs_18871.1.11	Mrg11	7C	451645093
avgbs_18881.1.24	Mrg23	3C	520849106
avgbs_18882.1.12	Mrg01	1D	337904444
avgbs_1891.1.28	Mrg21	4D	266095186
avgbs_18944.1.40	Mrg24	5D	318898497
avgbs_18989.1.12	Mrg05	6A	229325556
avgbs_18990.1.58	Mrg28	1C	18791807
avgbs_18994.1.64	Mrg18	1A	484050653
avgbs_18995.1.10	Mrg13	2C	429501176
avgbs_19022.1.45	Mrg04	6D	264011378
avgbs_19038.1.63	Mrg23	3A	22426108
avgbs_19045.1.12	Mrg01	1D	400076767
avgbs_19077.1.55	Mrg04	6D	15609969
avgbs_19097.1.39	Mrg02	7D	318459276
avgbs_19122.1.57	Mrg19	3D	442825833
avgbs_19157.1.55	Mrg13	2C	528398949
avgbs_1920.1.36	Mrg17	6C	101544515
avgbs_19207.1.58	Mrg11	7C	699477858
avgbs_19209.1.30	Mrg28	1C	207097169
avgbs_19223.1.22	Mrg06	5D	339108137
avgbs_19224.1.26	Mrg03	5C	431765831
avgbs_19281.1.16	Mrg15	3C	128424314
avgbs_19288.1.46	Mrg11	7C	78205686
avgbs_19291.1.20	Mrg24	5A	142211009
avgbs_19300.1.13	Mrg15	3C	546452639
avgbs_19302.1.32	Mrg19	3D	28290301
avgbs_19308.1.13	Mrg24	5A	475536460
avgbs_1934.1.32	Mrg03	5C	128523208
avgbs_19475.1.35	Mrg06	5D	411187691
avgbs_19491.1.63	Mrg03	5C	18451920
avgbs_19492.1.37	Mrg12	Chr00	73578807
avgbs_19493.1.13	Mrg33	2A	388910416
avgbs_19524.1.40	Mrg15	3C	534312430
avgbs_1953.1.50	Mrg08	2D	395465262
avgbs_19556.1.28	Mrg23	3A	399183843
avgbs_19579.1.58	Mrg21	4D	382393980
avgbs_19589.1.19	Mrg04	6D	142098850
avgbs_19593.1.15	Mrg20	NA	NA
avgbs_19594.1.34	Mrg09	4C	483084549
avgbs_19604.1.51	Mrg08	2D	391882802
avgbs_19636.1.44	Mrg11	7C	678580154
avgbs_19638.1.29	Mrg15	NA	NA
avgbs_19661.1.60	Mrg19	3D	425334396
avgbs_19684.1.60	Mrg24	5A	43051252
avgbs_19695.1.55	Mrg01	1D	345645500
avgbs_19699.1.42	Mrg28	1C	27086531
avgbs_19704.1.35	Mrg20	4A	436155998
avgbs_19742.1.14	Mrg13	2C	9265186
avgbs_19758.1.41	Mrg17	6C	521461167
avgbs_19771.1.11	Mrg33	2A	334683444
avgbs_19783.1.35	Mrg19	3D	406244967
avgbs_19801.1.19	Mrg09	NA	NA
avgbs_19805.1.14	Mrg01	1D	370852437
avgbs_19824.1.18	Mrg21	4D	370849050
avgbs_19836.1.36	Mrg18	1A	383224439
avgbs_19846.1.13	Mrg13	2C	542138385
avgbs_19850.1.16	Mrg17	6C	594058301
avgbs_1987.1.49	Mrg28	1C	446790089
avgbs_19876.1.34	Mrg11	7C	636643352
avgbs_200000.1.55	Mrg19	3D	368875606
avgbs_200002.1.12	Mrg08	2D	419053132
avgbs_200007.1.34	Mrg21	4D	424015632
avgbs_200009.1.47	Mrg02	7D	408200555
avgbs_200016.1.44	Mrg03	5C	91227126
avgbs_200022.1.39	Mrg19	3D	455193425
avgbs_200025.1.30	Mrg20	NA	NA
avgbs_200035.1.32	Mrg17	6C	326533870
avgbs_200040.1.48	Mrg08	2D	507493922
avgbs_200044.1.23	Mrg03	5C	531612866
avgbs_200045.1.64	Mrg03	5C	546722904
avgbs_200049.1.27	Mrg20	4A	341716639
avgbs_200053.1.47	Mrg03	5C	475445030
avgbs_200054.1.50	Mrg03	5C	486076685
avgbs_200055.1.40	Mrg08	2D	476927144
avgbs_200059.1.42	Mrg03	NA	NA
avgbs_200063.1.60	Mrg08	2D	394129276
[truncated: 60,051 more rows]
